# Supplementary material for: Population health and regional variations of disease burden in Japan, 1990–2015: a systematic subnational analysis for the Global Burden of Disease Study 2015
Source: PubMed Central journal article supplement — Lancet. 2017 Sep 23;390(10101):1521–38. doi: 10.1016/S0140-6736(17)31544-1 (PMC5613077; doi:10.1016/s0140-6736(17)31544-1), 2017-09-23
Supplement: mmc1.pdf [file mmc1.pdf]

# THE LANCET

## Supplementary appendix

This appendix formed part of the original submission and has been peer reviewed.  
We post it as supplied by the authors.

Supplement to: Nomura S, Sakamoto H, Glenn S, et al. Population health and regional variations of disease burden in Japan, 1990–2015: a systematic subnational analysis for the Global Burden of Disease Study 2015. *Lancet* 2017; published online July 19. [http://dx.doi.org/10.1016/S0140-6736\(17\)31544-1](http://dx.doi.org/10.1016/S0140-6736(17)31544-1).

Web Figure 1: GBD level 3 causes of years of life lost (YLLs) in Japan in 1990, 2005, and 2015 for both sexes combined, with age-standardised rate change.

| Leading causes 1990        | Leading causes 2005        | Percent change number of YLLs 1990-2005 | Percent change all-age YLL rate 1990-2005 | Percent change age-standardized YLL rate 1990-2005 | Leading causes 2015        | Percent change number of YLLs 2005-2015 | Percent change all-age YLL rate 2005-2015 | Percent change age-standardized YLL rate 2005-2015 |
|----------------------------|----------------------------|-----------------------------------------|-------------------------------------------|----------------------------------------------------|----------------------------|-----------------------------------------|-------------------------------------------|----------------------------------------------------|
| 1 Cerebrovascular disease  | 1 Cerebrovascular disease  | -8.6 (-9.8 to -7.3)                     | -11.2 (-12.3 to -9.9)                     | -39.9 (-40.7 to -39.1)                             | 1 Ischemic heart disease   | 6.4 (3.8 to 8.9)                        | 6.8 (4.2 to 9.3)                          | -15.2 (-17.4 to -13.1)                             |
| 2 Ischemic heart disease   | 2 Ischemic heart disease   | -3.2 (-4.6 to -2.0)                     | -6.0 (-7.3 to -4.7)                       | -35.1 (-36.2 to -34.3)                             | 2 Cerebrovascular disease  | -1.5 (-4.2 to 1.6)                      | -1.0 (-3.8 to 2.0)                        | -22.8 (-24.9 to -20.5)                             |
| 3 Stomach cancer           | 3 Self-harm                | 37.9 (33.7 to 41.5)                     | 33.9 (29.9 to 37.5)                       | 34.2 (30.3 to 37.5)                                | 3 Lower respiratory infect | 22.5 (17.0 to 28.2)                     | 22.9 (17.5 to 28.6)                       | -10.7 (-14.8 to -6.6)                              |
| 4 Lower respiratory infect | 4 Lower respiratory infect | 27.2 (24.0 to 30.2)                     | 23.6 (20.5 to 26.5)                       | -23.9 (-25.6 to -22.3)                             | 4 Lung cancer              | 6.9 (3.5 to 10.4)                       | 7.3 (3.9 to 10.7)                         | -11.9 (-14.5 to -9.0)                              |
| 5 Self-harm                | 5 Lung cancer              | 44.2 (41.5 to 46.8)                     | 40.1 (37.5 to 42.6)                       | -1.4 (-3.2 to 0.3)                                 | 5 Self-harm                | -9.0 (-12.0 to -5.8)                    | -8.7 (-11.7 to -5.5)                      | -5.3 (-8.1 to -2.5)                                |
| 6 Lung cancer              | 6 Stomach cancer           | -13.2 (-14.5 to -12.0)                  | -15.7 (-16.9 to -14.5)                    | -38.5 (-39.4 to -37.6)                             | 6 Alzheimer disease        | 47.2 (44.2 to 49.6)                     | 47.7 (44.8 to 50.2)                       | 2.3 (0.9 to 3.6)                                   |
| 7 Road injuries            | 7 Colorectal cancer        | 37.1 (34.6 to 39.8)                     | 33.2 (30.8 to 35.8)                       | -2.3 (-4.1 to -0.5)                                | 7 Stomach cancer           | -6.3 (-9.3 to -3.7)                     | -6.0 (-9.0 to -3.3)                       | -21.8 (-24.4 to -19.5)                             |
| 8 Liver cancer             | 8 Alzheimer disease        | 78.4 (76.4 to 80.6)                     | 73.4 (71.4 to 75.5)                       | -6.3 (-7.5 to -5.0)                                | 8 Colorectal cancer        | 8.4 (5.2 to 11.6)                       | 8.8 (5.6 to 12.0)                         | -8.5 (-11.0 to -5.9)                               |
| 9 Colorectal cancer        | 9 Liver cancer             | 11.1 (8.8 to 13.9)                      | 8.3 (5.8 to 10.6)                         | -21.7 (-23.2 to -19.8)                             | 9 Liver cancer             | -3.5 (-7.9 to 0.8)                      | -3.0 (-7.4 to 1.1)                        | -19.0 (-22.9 to -15.5)                             |
| 10 Alzheimer disease       | 10 Pancreatic cancer       | 49.7 (45.7 to 54.0)                     | 45.4 (41.6 to 49.6)                       | 4.8 (2.2 to 7.7)                                   | 10 Pancreatic cancer       | 20.1 (16.4 to 24.6)                     | 20.6 (16.8 to 25.1)                       | 1.1 (-2.1 to 4.9)                                  |
| 11 Chronic kidney disease  | 11 Chronic kidney disease  | 11.4 (8.5 to 14.2)                      | 8.2 (5.4 to 11.0)                         | -29.0 (-30.6 to -27.2)                             | 11 Chronic kidney disease  | 14.9 (10.6 to 19.4)                     | 15.4 (11.1 to 19.8)                       | -11.5 (-14.8 to -8.1)                              |
| 12 Congenital defects      | 12 Road injuries           | -47.8 (-49.2 to -46.4)                  | -49.3 (-50.6 to -48.0)                    | -48.4 (-49.9 to -46.9)                             | 12 COPD                    | 13.2 (8.6 to 18.1)                      | 13.7 (9.1 to 18.5)                        | -16.0 (-19.5 to -12.2)                             |
| 13 COPD                    | 13 COPD                    | -3.4 (-6.0 to 7.7)                      | -4.5 (-8.7 to 4.5)                        | -42.1 (-43.6 to -35.7)                             | 13 Breast cancer           | 5.6 (0.8 to 9.9)                        | 6.1 (1.2 to 10.3)                         | -1.7 (-6.0 to 2.3)                                 |
| 14 Pancreatic cancer       | 14 Breast cancer           | 43.3 (17.6 to 47.2)                     | 37.7 (14.4 to 43.0)                       | 21.8 (1.2 to 25.1)                                 | 14 Gallbladder cancer      | 0.8 (-4.0 to 6.4)                       | 1.4 (-3.6 to 6.8)                         | -18.8 (-22.6 to -14.3)                             |
| 15 Cirrhosis hepatitis C   | 15 Gallbladder cancer      | 10.4 (8.2 to 12.2)                      | 7.2 (5.1 to 9.0)                          | -27.1 (-28.6 to -26.0)                             | 15 Esophageal cancer       | 3.2 (-1.9 to 9.3)                       | 3.6 (-1.5 to 9.7)                         | -11.5 (-15.8 to -6.4)                              |
| 16 Gallbladder cancer      | 16 Esophageal cancer       | 40.2 (36.1 to 44.6)                     | 36.2 (32.2 to 40.5)                       | 0.2 (-2.6 to 3.3)                                  | 16 Road injuries           | -32.0 (-34.6 to -29.2)                  | -31.7 (-34.3 to -29.0)                    | -31.2 (-33.8 to -28.5)                             |
| 17 Leukemia                | 17 Cirrhosis hepatitis C   | -11.9 (-14.7 to 1.6)                    | -13.7 (-17.1 to -1.3)                     | -30.0 (-32.3 to -19.2)                             | 17 Cirrhosis hepatitis C   | 1.8 (-3.0 to 8.4)                       | 2.5 (-2.7 to 8.7)                         | -9.0 (-13.3 to -2.5)                               |
| 18 Breast cancer           | 18 Other neoplasms         | 5.4 (3.7 to 10.7)                       | 2.7 (0.7 to 7.5)                          | -13.3 (-14.6 to -7.3)                              | 18 Other neoplasms         | 8.1 (4.9 to 11.2)                       | 8.6 (5.3 to 11.6)                         | -4.1 (-7.1 to -1.4)                                |
| 19 Other neoplasms         | 19 Leukemia                | -5.7 (-7.2 to -4.0)                     | -8.4 (-9.8 to -6.7)                       | -23.7 (-25.1 to -22.4)                             | 19 Aortic aneurysm         | 28.5 (23.6 to 34.0)                     | 29.1 (24.1 to 34.5)                       | 3.3 (0.8 to 7.9)                                   |
| 20 Diabetes                | 20 Congenital defects      | -44.1 (-45.9 to -26.1)                  | -44.4 (-47.5 to -28.2)                    | -37.9 (-40.0 to -16.9)                             | 20 Leukemia                | 1.7 (-1.9 to 5.1)                       | 2.0 (-1.5 to 5.5)                         | -10.7 (-14.3 to -7.4)                              |
| 21 Esophageal cancer       | 22 Aortic aneurysm         |                                         |                                           |                                                    | 26 Congenital defects      |                                         |                                           |                                                    |
| 33 Aortic aneurysm         | 29 Diabetes                |                                         |                                           |                                                    | 29 Diabetes                |                                         |                                           |                                                    |

Legend:  
● Communicable, maternal, neonatal and nutritional  
● Non-communicable  
● Injuries

Alzheimer's disease=Alzheimer's disease and other dementias. Cirrhosis hepatitis C=cirrhosis of the liver due to hepatitis C. COPD=chronic obstructive pulmonary disease.

**Web Figure 2: Age-standardised rates (per 100 000) of years of life lost (YLLs) by GBD level 4 cause group for Japan and the 47 prefectures in 2015 for both sexes combined.**

|           | Self-harm | Ischaemic heart disease | Lower respiratory infect | Lung cancer | Haemorrhagic stroke | Stomach cancer | Colorectal cancer | Alzheimer disease | Ischaemic stroke | Pancreatic cancer | Breast cancer | Liver cancer hepatitis C | Other neoplasms | Cirrhosis hepatitis C | COVID | Esophageal cancer | Congenital heart | Diabetes CKD | Gallbladder cancer | Lymphoma |
|-----------|-----------|-------------------------|--------------------------|-------------|---------------------|----------------|-------------------|-------------------|------------------|-------------------|---------------|--------------------------|-----------------|-----------------------|-------|-------------------|------------------|--------------|--------------------|----------|
| Japan     | 781.0     | 622.1                   | 419.5                    | 402.4       | 362.6               | 322.7          | 308.1             | 247.3             | 226.7            | 183.4             | 153.0         | 138.3                    | 120.4           | 102.9                 | 100.2 | 91.7              | 90.8             | 88.2         | 86.0               | 81.9     |
| Hokkaido  | 865.4     | 619.4                   | 415.0                    | 459.4       | 361.6               | 307.0          | 317.3             | 238.8             | 205.6            | 219.2             | 173.2         | 123.6                    | 127.3           | 80.8                  | 96.6  | 93.7              | 81.9             | 110.9        | 93.6               | 83.5     |
| Aomori    | 984.0     | 734.9                   | 517.9                    | 463.8       | 495.0               | 398.4          | 400.0             | 249.2             | 313.4            | 224.1             | 181.2         | 140.2                    | 145.4           | 110.4                 | 102.1 | 101.9             | 93.1             | 133.7        | 121.5              | 86.8     |
| Iwate     | 1004.3    | 589.2                   | 445.7                    | 404.1       | 532.6               | 328.3          | 361.2             | 245.9             | 305.2            | 199.5             | 143.9         | 110.0                    | 137.1           | 88.7                  | 103.1 | 103.1             | 111.7            | 105.2        | 112.3              | 81.4     |
| Miyagi    | 773.3     | 521.8                   | 365.3                    | 377.3       | 409.0               | 303.6          | 291.9             | 239.0             | 250.5            | 189.8             | 153.0         | 103.3                    | 123.6           | 79.1                  | 82.1  | 98.4              | 97.0             | 78.3         | 86.5               | 78.8     |
| Akita     | 1020.9    | 584.3                   | 448.1                    | 389.1       | 470.5               | 461.8          | 364.8             | 246.1             | 290.1            | 212.9             | 150.9         | 97.8                     | 132.4           | 83.1                  | 97.5  | 131.8             | 80.5             | 98.0         | 117.8              | 80.6     |
| Yamagata  | 844.8     | 604.8                   | 401.5                    | 373.7       | 380.8               | 393.4          | 307.2             | 242.6             | 270.1            | 186.5             | 136.9         | 100.9                    | 119.7           | 72.9                  | 96.2  | 100.5             | 100.8            | 76.2         | 103.0              | 76.9     |
| Fukushima | 809.5     | 742.8                   | 406.7                    | 377.9       | 411.1               | 349.0          | 316.4             | 242.4             | 277.1            | 188.2             | 139.0         | 113.6                    | 117.4           | 89.7                  | 105.2 | 95.0              | 83.3             | 101.5        | 100.5              | 76.2     |
| Ibaraki   | 812.9     | 686.8                   | 452.9                    | 383.5       | 444.8               | 363.7          | 317.5             | 244.1             | 271.6            | 183.8             | 151.7         | 127.1                    | 124.9           | 103.8                 | 101.0 | 88.6              | 106.0            | 102.9        | 93.6               | 82.9     |
| Tochigi   | 828.8     | 749.8                   | 447.9                    | 382.3       | 457.1               | 366.6          | 319.2             | 242.5             | 277.6            | 168.8             | 147.5         | 131.7                    | 120.5           | 102.1                 | 96.6  | 85.7              | 99.9             | 96.4         | 89.9               | 82.5     |
| Gunma     | 842.0     | 634.3                   | 458.4                    | 362.9       | 400.7               | 324.1          | 306.0             | 215.0             | 249.6            | 163.8             | 151.7         | 125.5                    | 117.7           | 97.4                  | 103.1 | 82.9              | 99.6             | 85.2         | 91.9               | 77.3     |
| Saitama   | 786.9     | 793.9                   | 458.5                    | 407.1       | 384.8               | 346.0          | 328.9             | 245.7             | 246.5            | 177.3             | 164.6         | 118.7                    | 125.7           | 93.7                  | 97.7  | 99.4              | 87.5             | 92.7         | 87.4               | 81.2     |
| Chiba     | 769.6     | 656.6                   | 422.8                    | 398.2       | 372.5               | 337.7          | 317.4             | 242.0             | 236.1            | 182.1             | 158.5         | 123.6                    | 126.9           | 88.0                  | 101.3 | 94.6              | 89.3             | 91.7         | 84.0               | 78.2     |
| Tokyo     | 759.1     | 634.5                   | 408.2                    | 397.8       | 364.4               | 302.0          | 323.9             | 240.2             | 206.8            | 185.9             | 169.9         | 141.4                    | 116.5           | 141.9                 | 87.9  | 114.0             | 92.5             | 86.8         | 78.3               | 81.0     |
| Kanagawa  | 731.0     | 601.0                   | 393.4                    | 386.7       | 365.7               | 302.2          | 318.4             | 241.4             | 212.4            | 178.7             | 163.2         | 116.4                    | 113.6           | 112.0                 | 104.6 | 104.5             | 81.3             | 73.8         | 77.0               | 80.9     |
| Niigata   | 870.9     | 519.3                   | 349.5                    | 386.3       | 379.4               | 385.1          | 307.7             | 314.8             | 249.7            | 193.7             | 146.5         | 85.3                     | 113.3           | 69.2                  | 89.6  | 115.8             | 81.5             | 66.3         | 96.3               | 77.8     |
| Toyama    | 797.5     | 513.9                   | 419.9                    | 361.4       | 344.1               | 366.3          | 292.9             | 240.4             | 239.5            | 193.4             | 144.0         | 110.2                    | 116.0           | 78.3                  | 89.5  | 81.0              | 103.0            | 79.3         | 88.1               | 83.3     |
| Ishikawa  | 708.7     | 522.5                   | 392.3                    | 389.6       | 312.7               | 332.2          | 286.0             | 239.4             | 221.5            | 182.2             | 150.1         | 119.7                    | 110.6           | 78.5                  | 89.9  | 67.2              | 92.6             | 70.7         | 93.2               | 82.1     |
| Fukui     | 682.1     | 558.9                   | 378.0                    | 363.1       | 282.7               | 299.6          | 256.7             | 237.6             | 200.2            | 172.8             | 122.1         | 120.8                    | 109.9           | 76.4                  | 88.5  | 50.2              | 94.6             | 74.2         | 93.1               | 79.1     |
| Yamanashi | 797.4     | 564.5                   | 381.3                    | 343.3       | 342.1               | 306.1          | 288.4             | 243.3             | 238.4            | 183.5             | 139.4         | 170.1                    | 125.1           | 105.9                 | 103.5 | 85.9              | 91.3             | 88.1         | 95.7               | 83.6     |
| Nagano    | 729.0     | 514.9                   | 312.6                    | 301.8       | 374.3               | 271.3          | 278.4             | 239.1             | 259.1            | 179.0             | 137.3         | 97.4                     | 112.1           | 75.1                  | 90.2  | 74.2              | 85.8             | 66.3         | 85.4               | 76.4     |
| Gifu      | 728.6     | 600.4                   | 386.2                    | 378.5       | 345.9               | 350.4          | 305.3             | 242.9             | 222.8            | 178.5             | 143.5         | 122.2                    | 121.3           | 81.1                  | 105.7 | 63.7              | 95.5             | 81.7         | 77.8               | 81.6     |
| Shizuoka  | 743.3     | 569.5                   | 375.1                    | 369.4       | 417.7               | 288.7          | 293.6             | 242.9             | 242.4            | 184.3             | 156.9         | 132.0                    | 118.3           | 85.4                  | 100.4 | 78.6              | 76.6             | 96.2         | 84.8               | 82.2     |
| Aichi     | 725.9     | 605.5                   | 413.7                    | 428.7       | 368.9               | 337.7          | 317.7             | 316.4             | 220.3            | 184.3             | 145.7         | 118.0                    | 113.2           | 80.8                  | 94.7  | 80.0              | 96.5             | 80.1         | 80.8               | 81.3     |
| Mie       | 699.1     | 616.4                   | 391.7                    | 401.5       | 323.8               | 313.9          | 280.9             | 239.7             | 229.8            | 173.9             | 132.7         | 108.3                    | 117.9           | 81.0                  | 98.7  | 66.5              | 110.6            | 89.3         | 77.0               | 80.5     |
| Shiga     | 658.6     | 498.1                   | 336.5                    | 358.6       | 283.0               | 290.9          | 244.4             | 234.0             | 173.7            | 163.9             | 126.4         | 100.3                    | 109.8           | 66.7                  | 95.7  | 57.0              | 104.3            | 63.6         | 80.7               | 76.6     |
| Kyoto     | 732.6     | 631.8                   | 381.3                    | 410.9       | 305.0               | 307.9          | 297.9             | 212.5             | 180.4            | 175.4             | 144.4         | 131.9                    | 116.3           | 83.4                  | 97.3  | 79.6              | 96.9             | 82.2         | 77.6               | 80.3     |
| Osaka     | 820.3     | 764.9                   | 499.4                    | 462.3       | 306.8               | 352.5          | 318.7             | 244.4             | 214.5            | 188.4             | 160.4         | 184.8                    | 119.6           | 135.1                 | 106.3 | 102.9             | 81.2             | 98.4         | 82.1               | 84.9     |
| Hyogo     | 775.7     | 606.8                   | 404.5                    | 417.2       | 313.1               | 327.7          | 297.7             | 241.1             | 203.6            | 179.3             | 141.3         | 160.0                    | 119.2           | 110.5                 | 99.6  | 92.9              | 72.4             | 85.7         | 79.6               | 81.9     |
| Nara      | 665.8     | 467.8                   | 373.3                    | 414.3       | 259.9               | 355.2          | 268.9             | 237.2             | 199.3            | 173.4             | 147.3         | 139.3                    | 120.6           | 86.2                  | 97.1  | 80.4              | 101.1            | 69.1         | 75.6               | 81.5     |
| Wakayama  | 813.3     | 714.6                   | 418.5                    | 435.8       | 303.2               | 356.5          | 299.1             | 219.3             | 225.2            | 190.8             | 145.2         | 165.3                    | 125.5           | 105.4                 | 115.8 | 84.5              | 97.6             | 81.8         | 76.7               | 84.5     |
| Totomi    | 831.4     | 602.7                   | 389.4                    | 430.3       | 382.8               | 377.7          | 319.1             | 244.6             | 254.0            | 200.5             | 139.8         | 166.1                    | 128.2           | 95.8                  | 106.4 | 88.9              | 109.9            | 82.1         | 90.6               | 90.5     |
| Shimane   | 911.6     | 466.3                   | 395.2                    | 377.4       | 323.6               | 344.6          | 308.3             | 252.1             | 217.1            | 203.3             | 125.9         | 157.8                    | 124.9           | 95.2                  | 110.4 | 95.2              | 81.6             | 78.0         | 90.4               | 88.3     |
| Okayama   | 693.4     | 579.4                   | 436.7                    | 377.7       | 355.7               | 299.6          | 256.8             | 239.0             | 214.0            | 171.5             | 141.3         | 143.3                    | 114.9           | 97.2                  | 109.0 | 73.5              | 98.3             | 83.8         | 77.8               | 82.9     |
| Hiroshima | 735.6     | 634.6                   | 403.7                    | 387.7       | 331.8               | 302.8          | 278.3             | 239.2             | 199.2            | 172.7             | 137.4         | 196.5                    | 123.8           | 121.3                 | 105.2 | 79.8              | 101.6            | 87.1         | 74.4               | 84.6     |
| Yamaguchi | 813.5     | 634.6                   | 472.2                    | 395.5       | 332.4               | 327.7          | 299.3             | 240.4             | 235.0            | 165.9             | 149.8         | 153.3                    | 119.3           | 101.3                 | 99.1  | 92.8              | 97.9             | 87.4         | 75.4               | 82.4     |
| Tokushima | 747.0     | 555.7                   | 470.7                    | 408.8       | 347.1               | 338.3          | 290.9             | 243.8             | 232.0            | 168.8             | 135.7         | 168.4                    | 133.5           | 127.9                 | 121.9 | 65.2              | 130.1            | 116.0        | 90.5               | 91.3     |
| Kagawa    | 729.6     | 571.8                   | 416.1                    | 424.4       | 336.6               | 367.7          | 274.5             | 220.2             | 239.0            | 188.8             | 135.1         | 148.5                    | 116.1           | 103.7                 | 113.0 | 67.5              | 109.2            | 98.8         | 88.2               | 91.2     |
| Ehime     | 827.6     | 661.3                   | 434.3                    | 407.4       | 358.2               | 362.2          | 285.2             | 244.7             | 247.0            | 191.8             | 154.4         | 185.5                    | 131.8           | 112.9                 | 125.9 | 68.2              | 77.4             | 97.2         | 89.6               | 89.7     |
| Kochi     | 842.6     | 660.7                   | 475.2                    | 393.3       | 400.3               | 330.9          | 293.2             | 244.1             | 246.9            | 189.1             | 145.0         | 158.8                    | 131.7           | 121.5                 | 114.4 | 91.2              | 123.8            | 103.6        | 88.6               | 84.0     |
| Fukuoka   | 786.0     | 476.5                   | 439.9                    | 407.2       | 306.6               | 296.7          | 300.3             | 223.3             | 190.7            | 179.6             | 160.6         | 192.0                    | 120.9           | 105.8                 | 94.2  | 86.7              | 86.1             | 82.4         | 86.6               | 80.1     |
| Saga      | 760.4     | 467.2                   | 443.0                    | 398.6       | 306.3               | 336.4          | 301.5             | 242.8             | 202.2            | 184.2             | 153.5         | 210.9                    | 122.3           | 107.3                 | 102.0 | 75.4              | 81.5             | 71.2         | 93.8               | 84.2     |
| Nagasaki  | 789.5     | 565.2                   | 462.8                    | 433.0       | 331.7               | 314.8          | 318.0             | 242.7             | 214.4            | 179.2             | 160.1         | 218.1                    | 130.3           | 129.5                 | 110.7 | 81.6              | 120.5            | 83.2         | 97.9               | 90.5     |
| Kumamoto  | 765.1     | 458.4                   | 399.1                    | 374.4       | 350.4               | 236.3          | 268.9             | 240.3             | 186.4            | 175.6             | 148.3         | 162.2                    | 126.8           | 100.3                 | 101.3 | 69.1              | 82.2             | 82.5         | 89.8               | 85.0     |
| Oita      | 750.1     | 545.7                   | 380.0                    | 368.0       | 328.8               | 263.3          | 253.4             | 310.6             | 207.4            | 169.3             | 138.6         | 152.7                    | 113.3           | 94.1                  | 104.2 | 72.3              | 84.1             | 83.1         | 86.1               | 82.0     |
| Miyazaki  | 869.9     | 552.3                   | 426.2                    | 378.5       | 368.2               | 291.6          | 271.9             | 242.9             | 237.9            | 181.9             | 133.3         | 148.3                    | 126.5           | 101.7                 | 114.6 | 89.1              | 101.6            | 82.8         | 101.7              | 84.6     |
| Kagoshima | 819.1     | 609.5                   | 488.0                    | 398.0       | 442.8               | 256.4          | 298.4             | 243.2             | 256.1            | 173.9             | 140.4         | 148.1                    | 134.2           | 108.9                 | 122.3 | 109.1             | 102.9            | 103.1        | 101.8              | 90.2     |
| Okinawa   | 917.5     | 694.4                   | 520.7                    | 456.8       | 419.3               | 221.4          | 373.5             | 236.6             | 188.0            | 144.6             | 144.0         | 103.6                    | 144.1           | 149.3                 | 167.0 | 95.2              | 97.0             | 114.7        | 102.6              | 95.0     |

■ Significantly lower than national mean  
■ Indistinguishable from national mean  
■ Significantly higher than national mean

Japan and prefectures are ordered from north (Hokkaido) to south (Okinawa). The causes shown are the top 20 age-standardised YLLs rates in Japan. Rates are colour-coded to denote statistically significant differences from Japan's national mean. Green indicates significantly lower age-standardised YLLs rates than Japan, red indicates significantly higher age-standardised YLLs than Japan. Alzheimer's disease=Alzheimer's disease and other dementias. Liver cancer hepatitis C=liver cancer due to due to hepatitis C. Cirrhosis hepatitis C=cirrhosis of the liver due to hepatitis C.

**Web Figure 3: Proportion of age-standardised disability-adjusted life years (DALYs) attributed to GBD level 2 risk factors for Japan and the 47 prefectures in 2015 for both sexes combined (A), men (B), and women (C).**

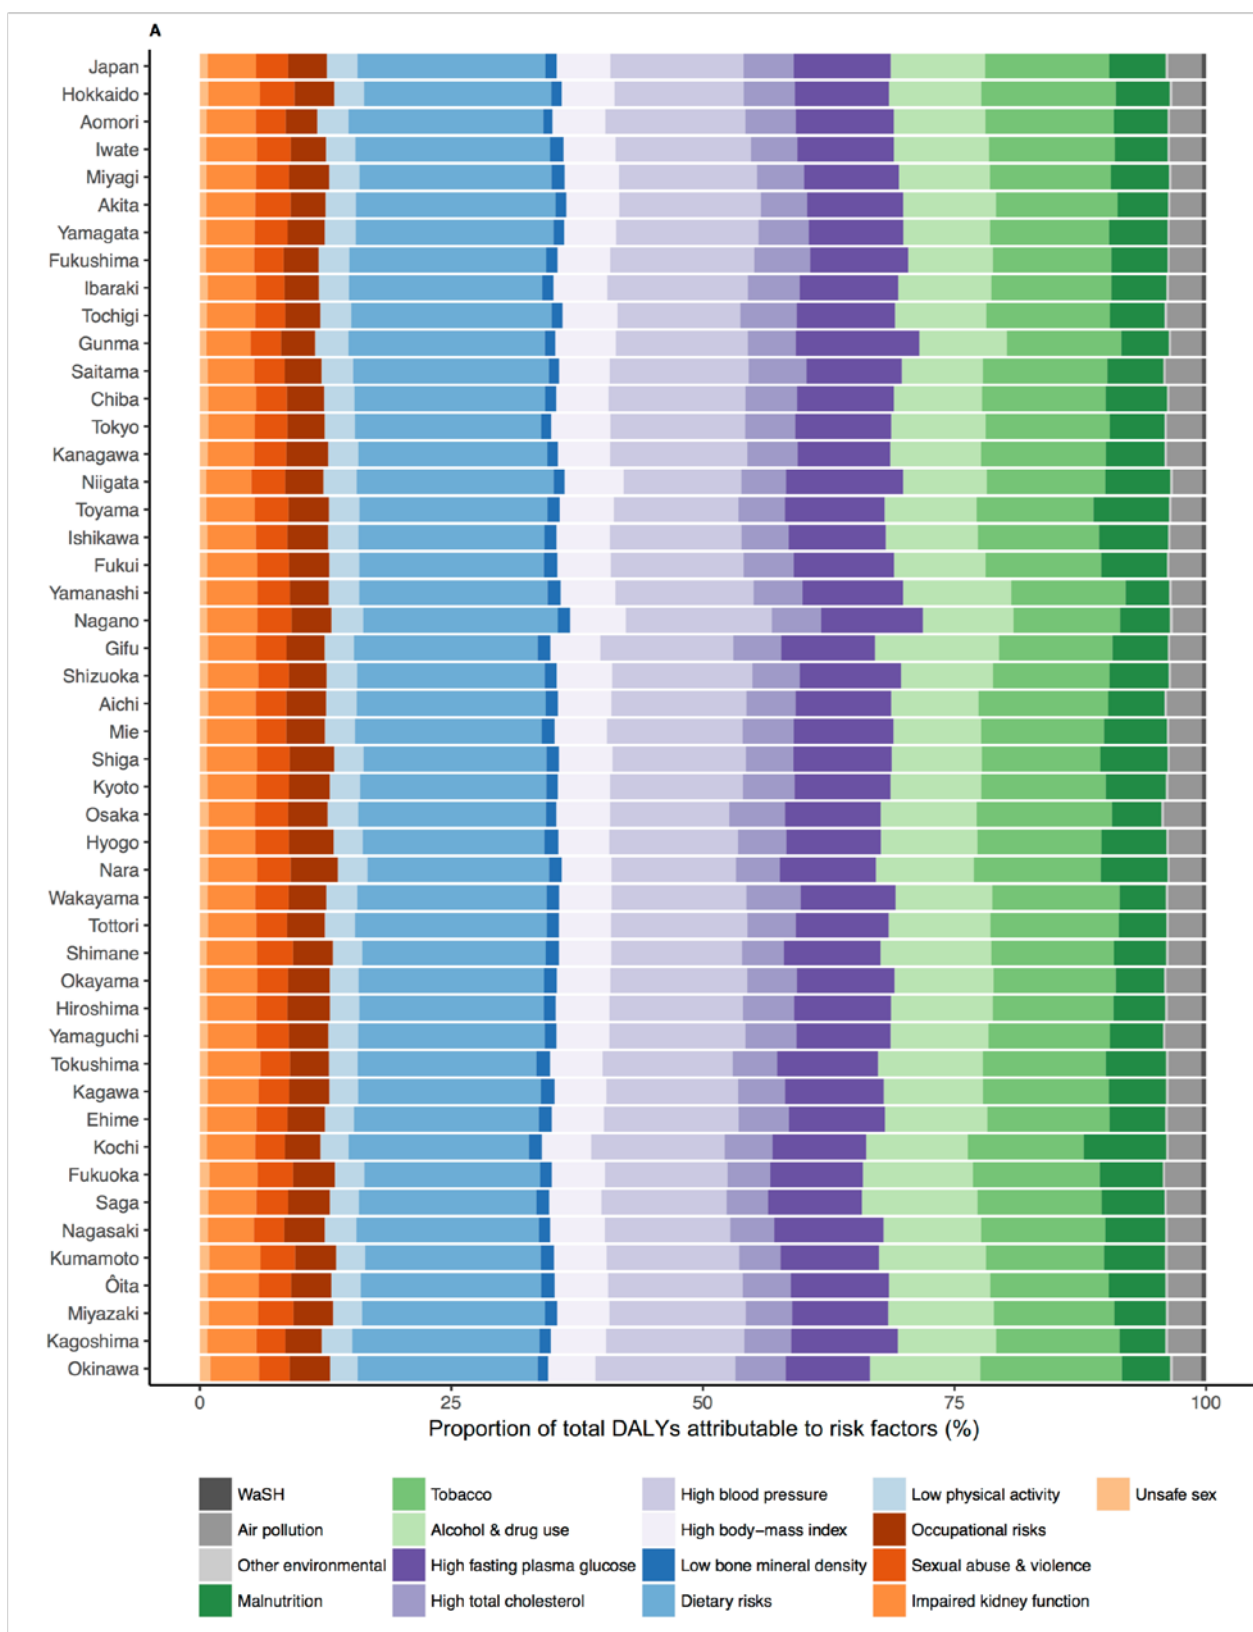

(Web Figure 3 continues on next page)

(A) Both sexes combined.

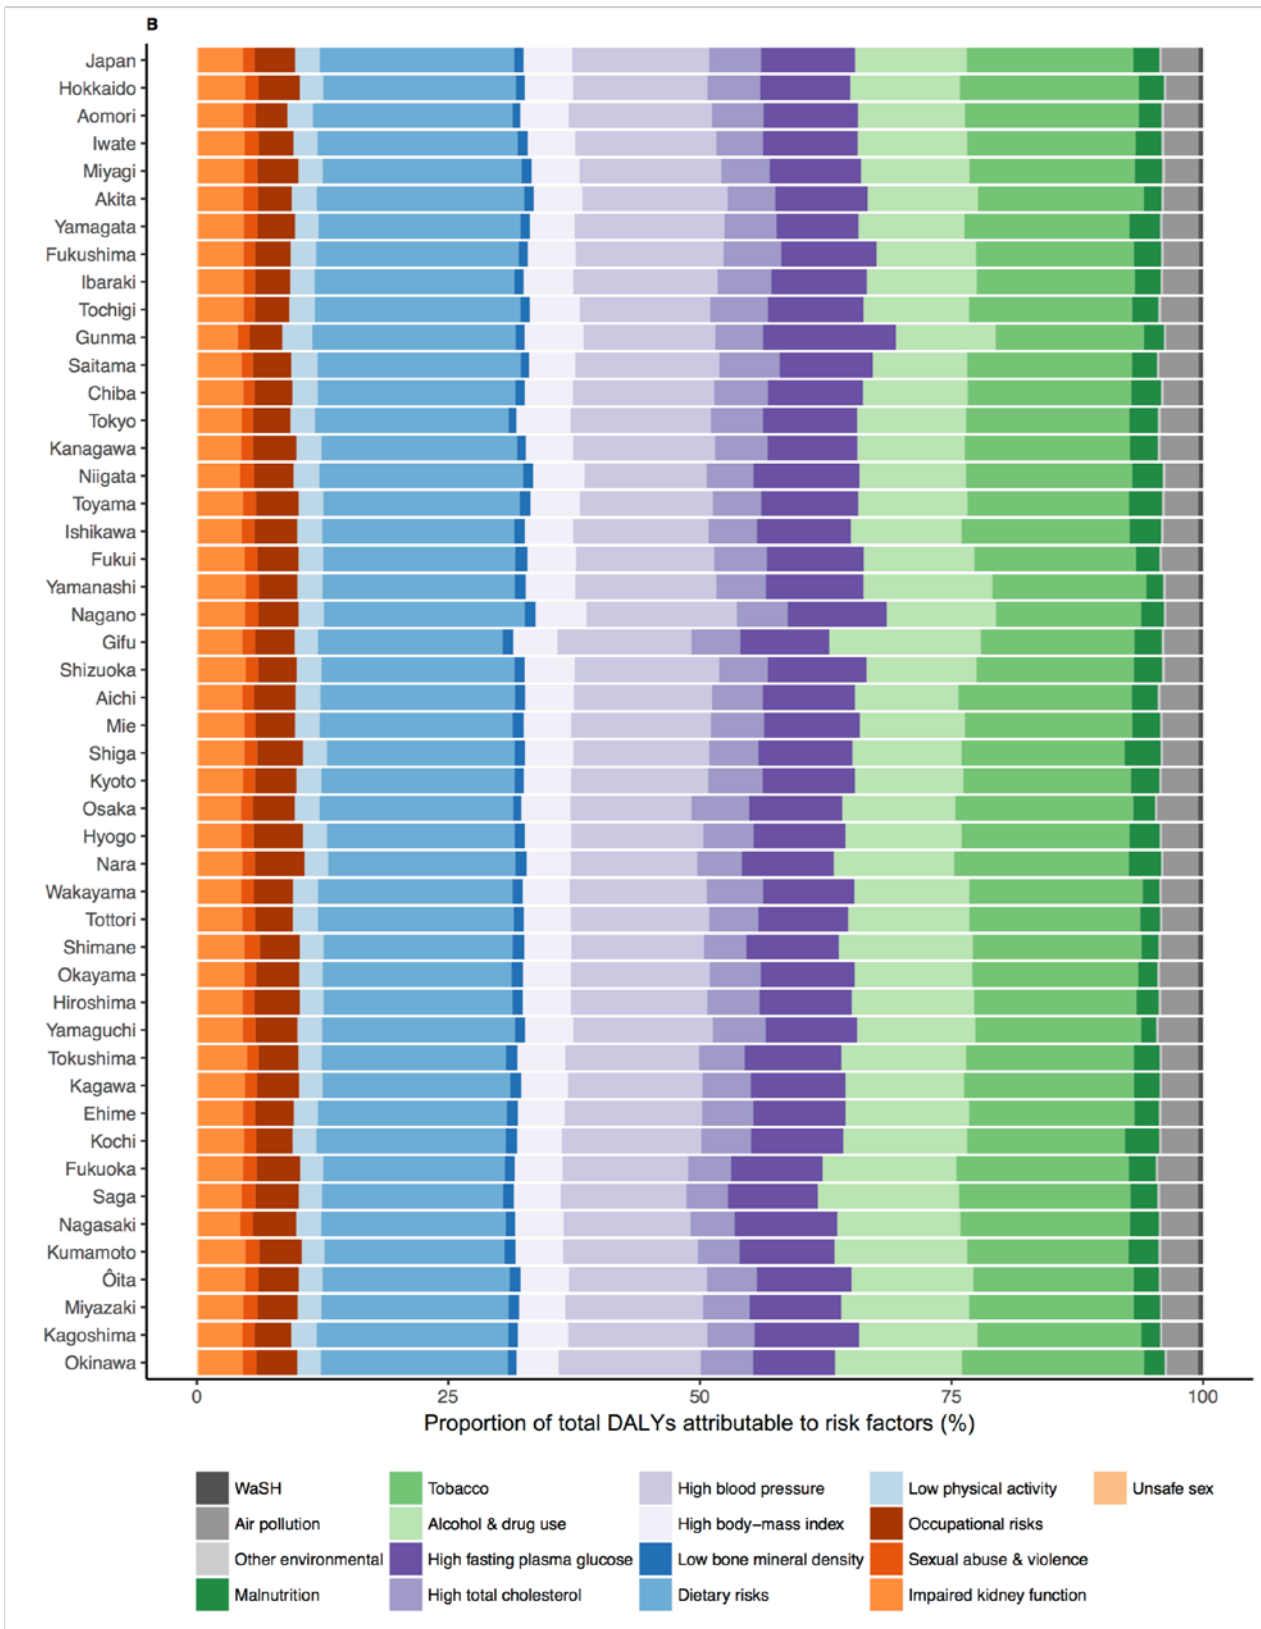

(Web Figure 3 continues on next page)

(B) Men.

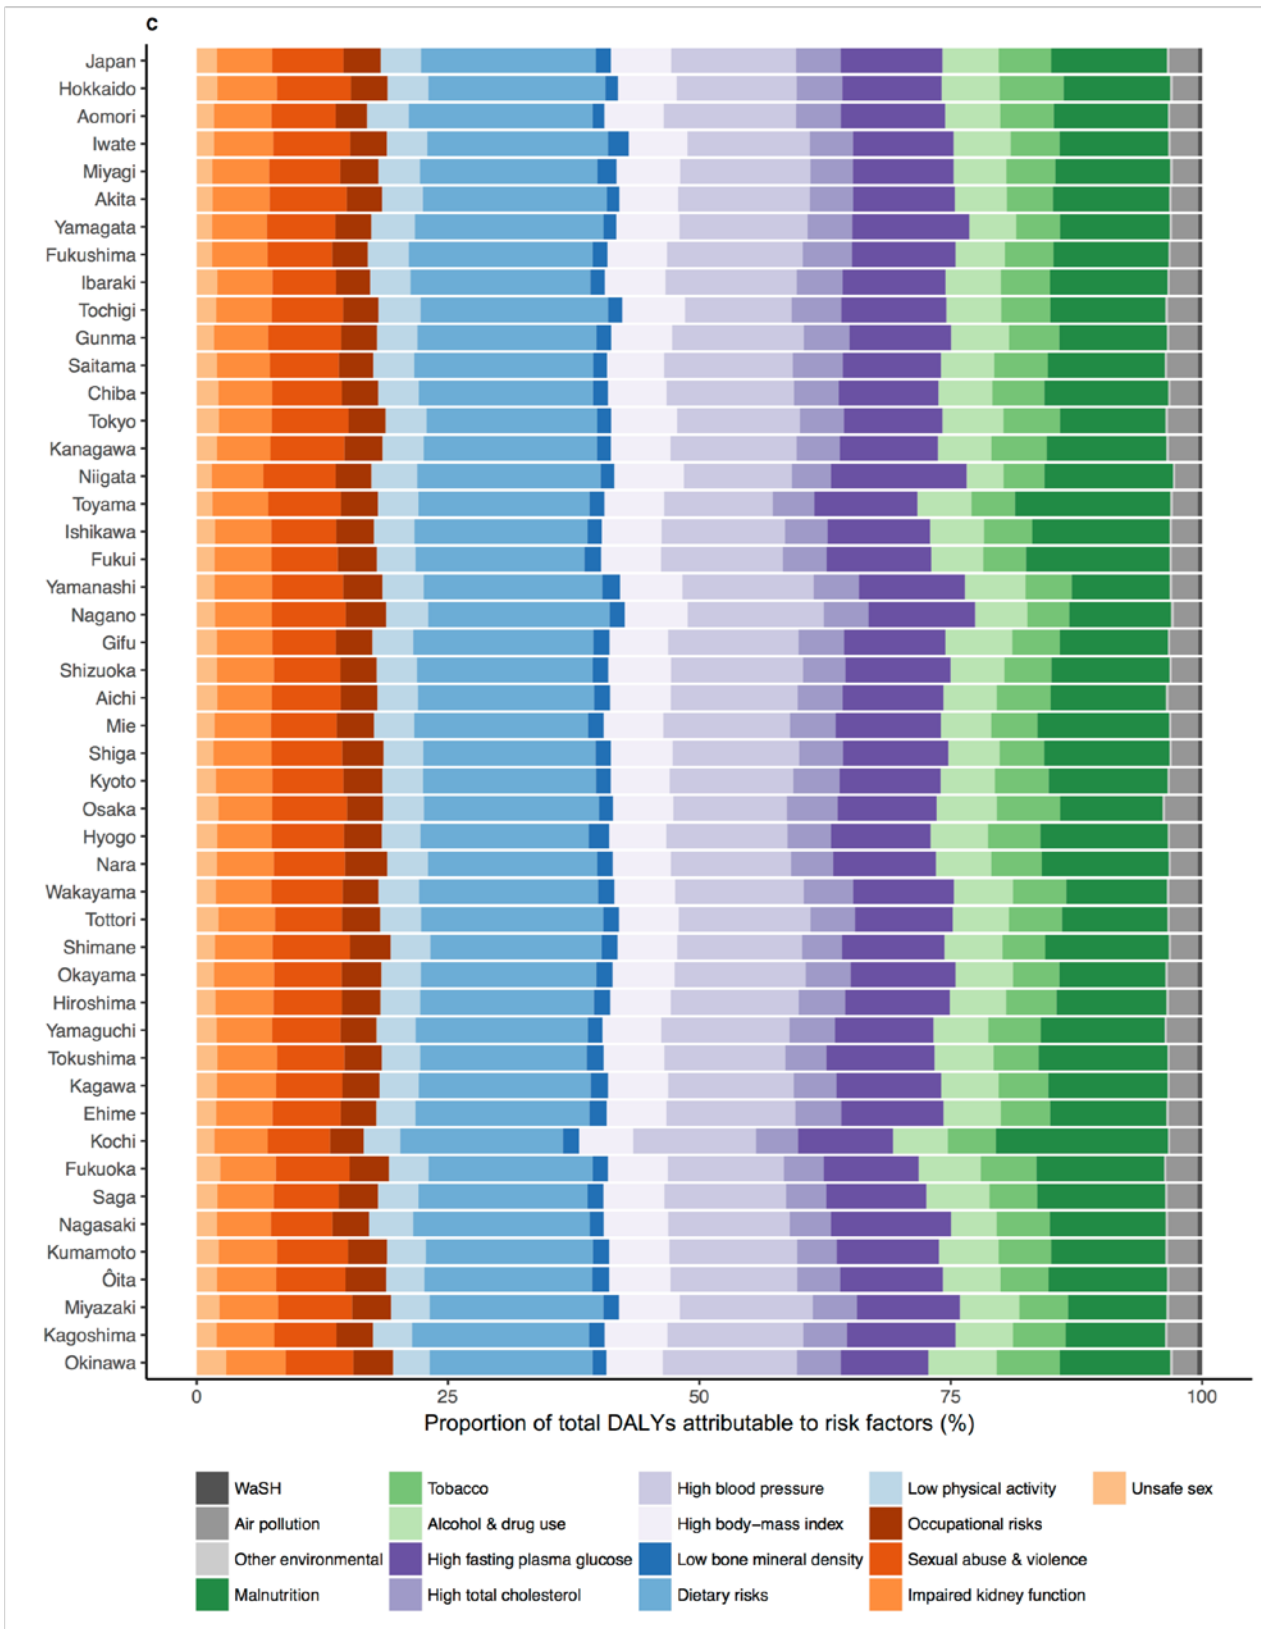

(C) Women- Japan and prefectures are ordered from north (Hokkaido) to south (Okinawa).

**Web Figure 4: Proportion of age-standardised mortality attributed to GBD level 2 risk factors for Japan and the 47 prefectures in 2015 for both sexes combined (A), men (B), and women (C).**

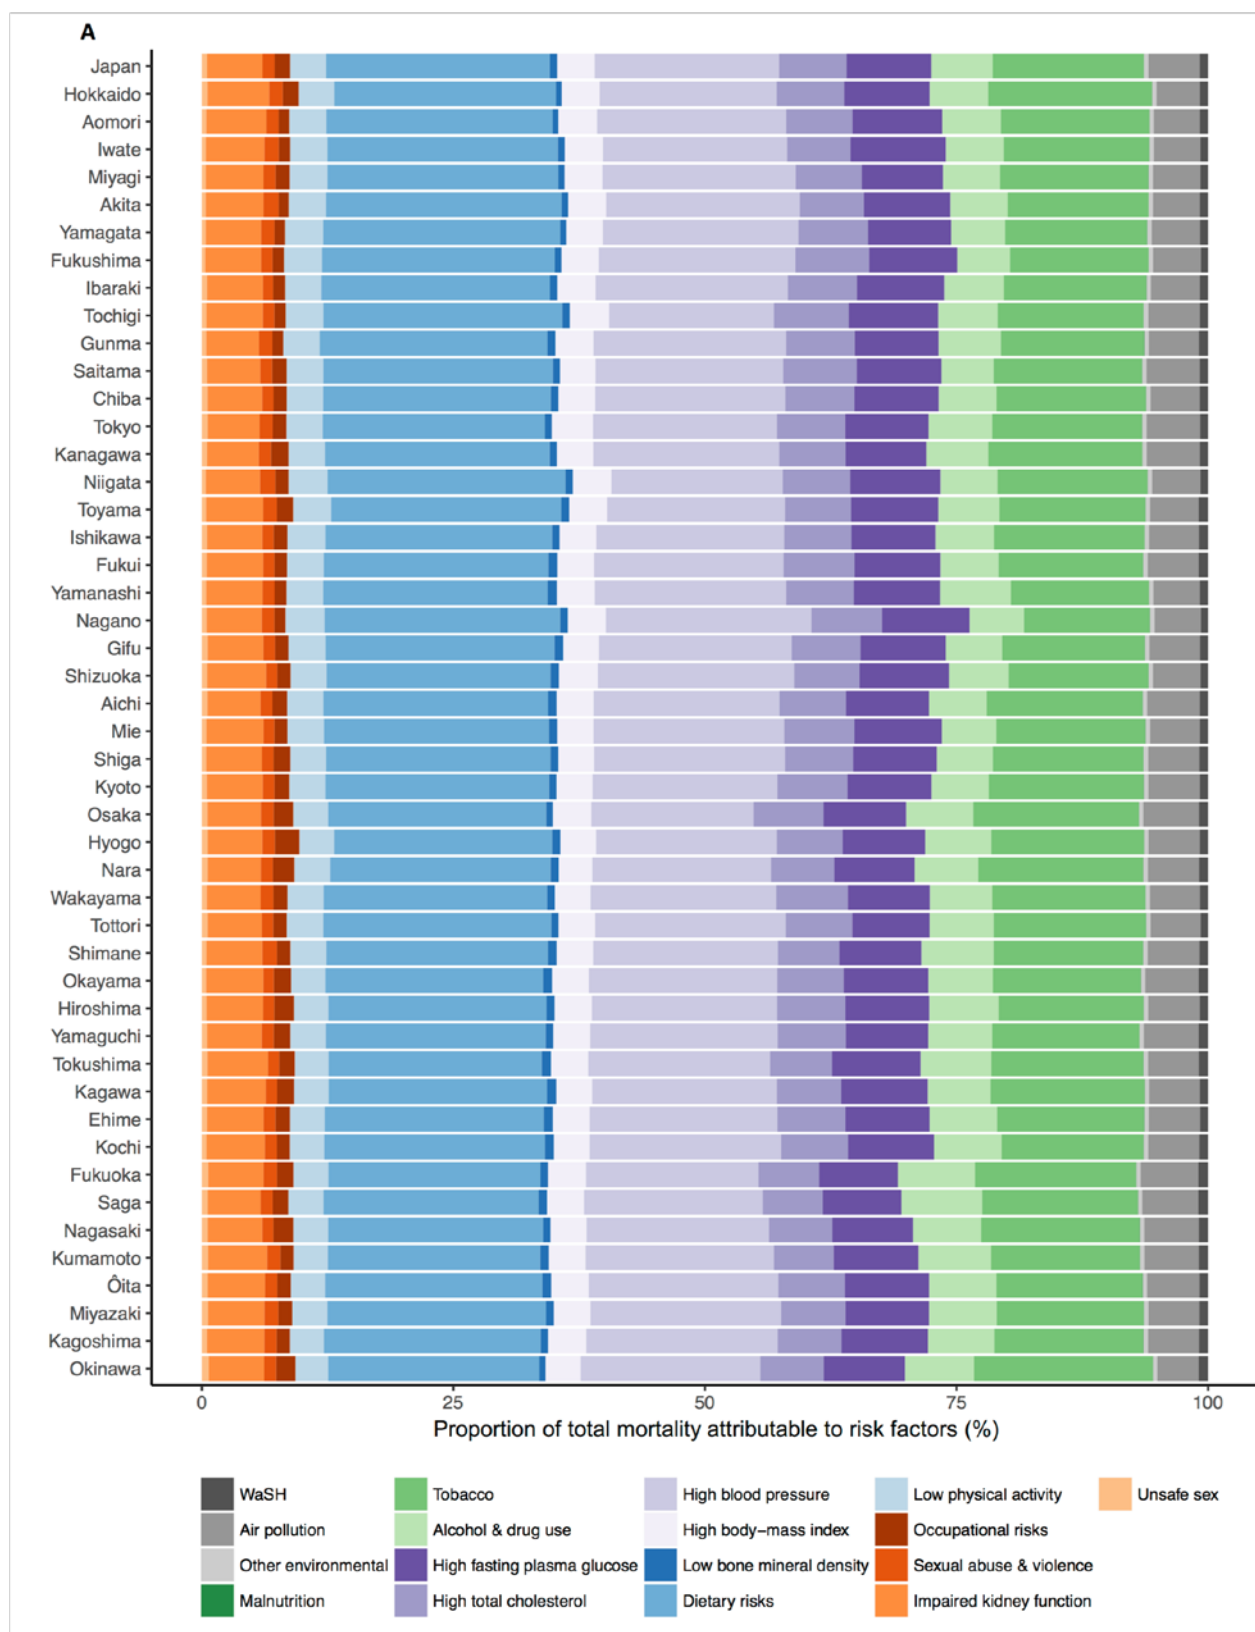

(Web Figure 4 continues on next page)

(A) Both sexes combined.

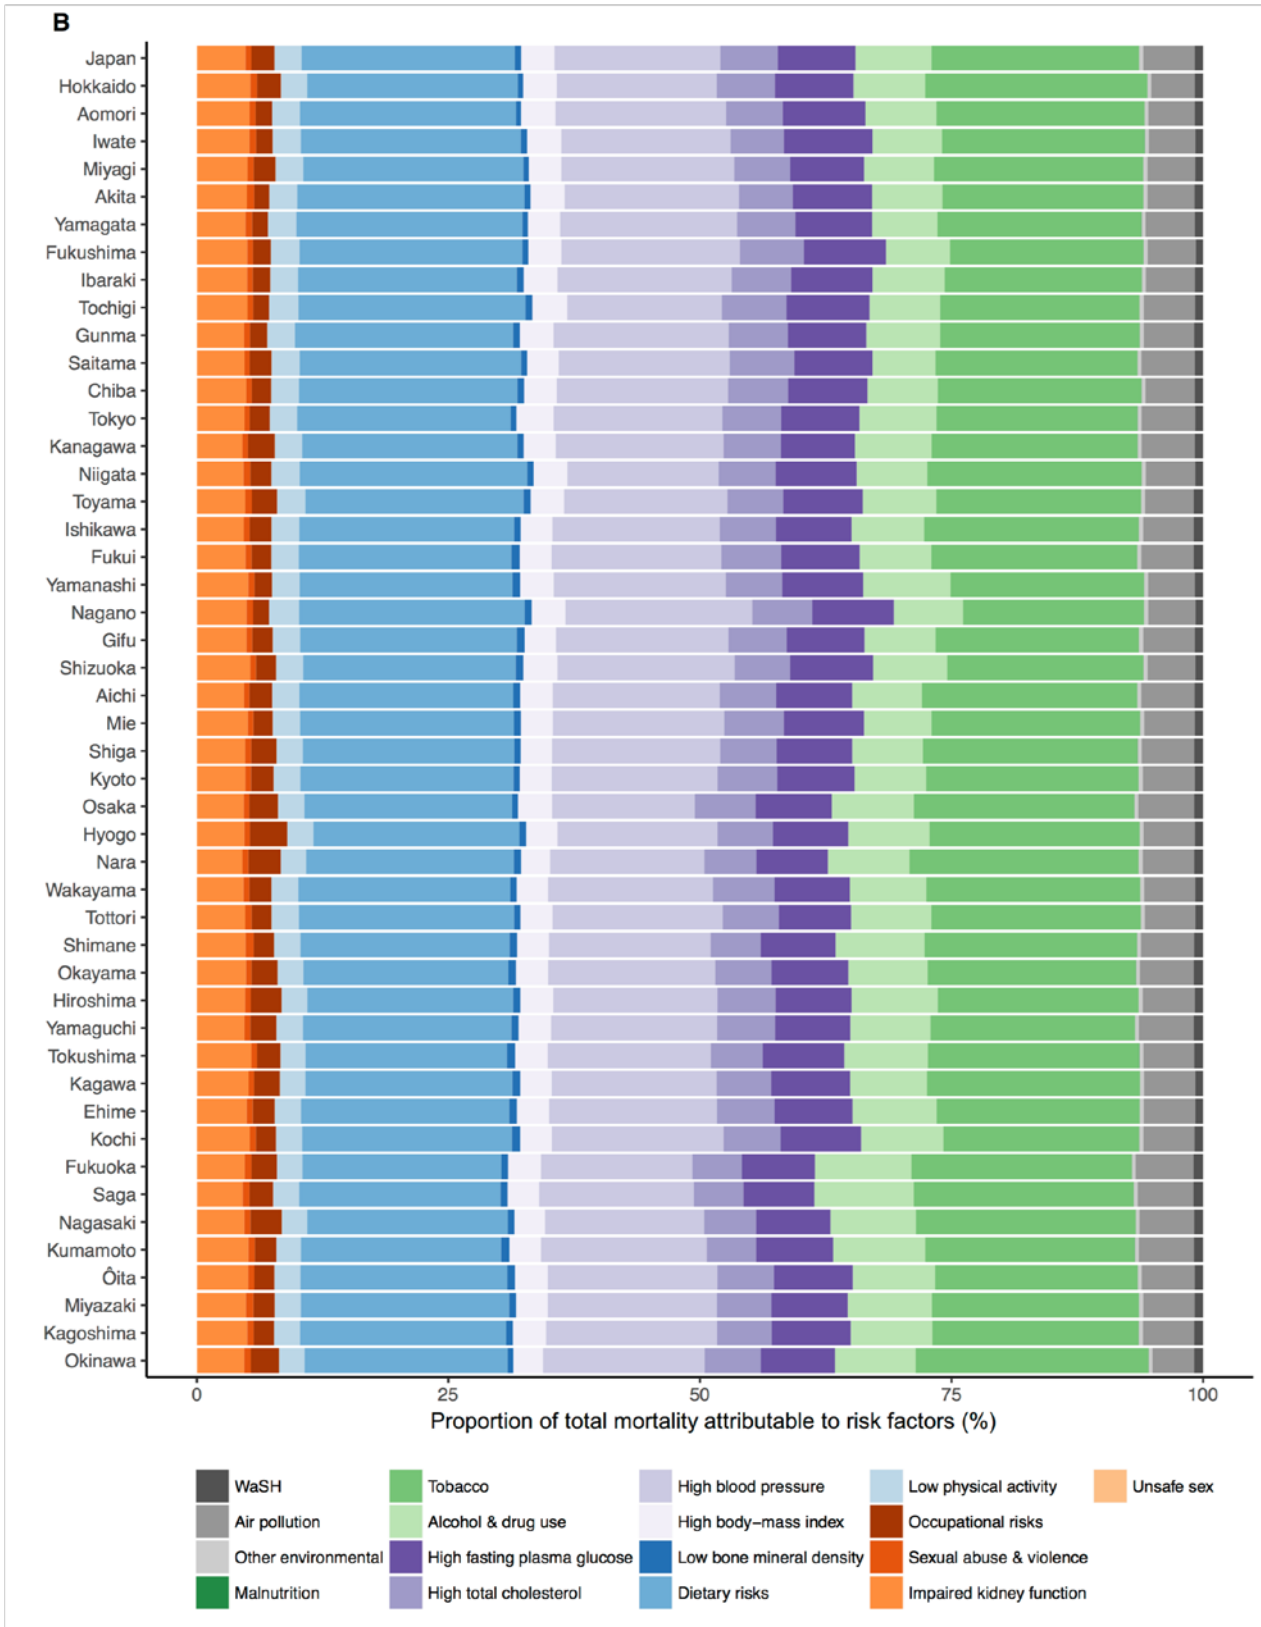

(Web Figure 4 continues on next page)

(B) Men.



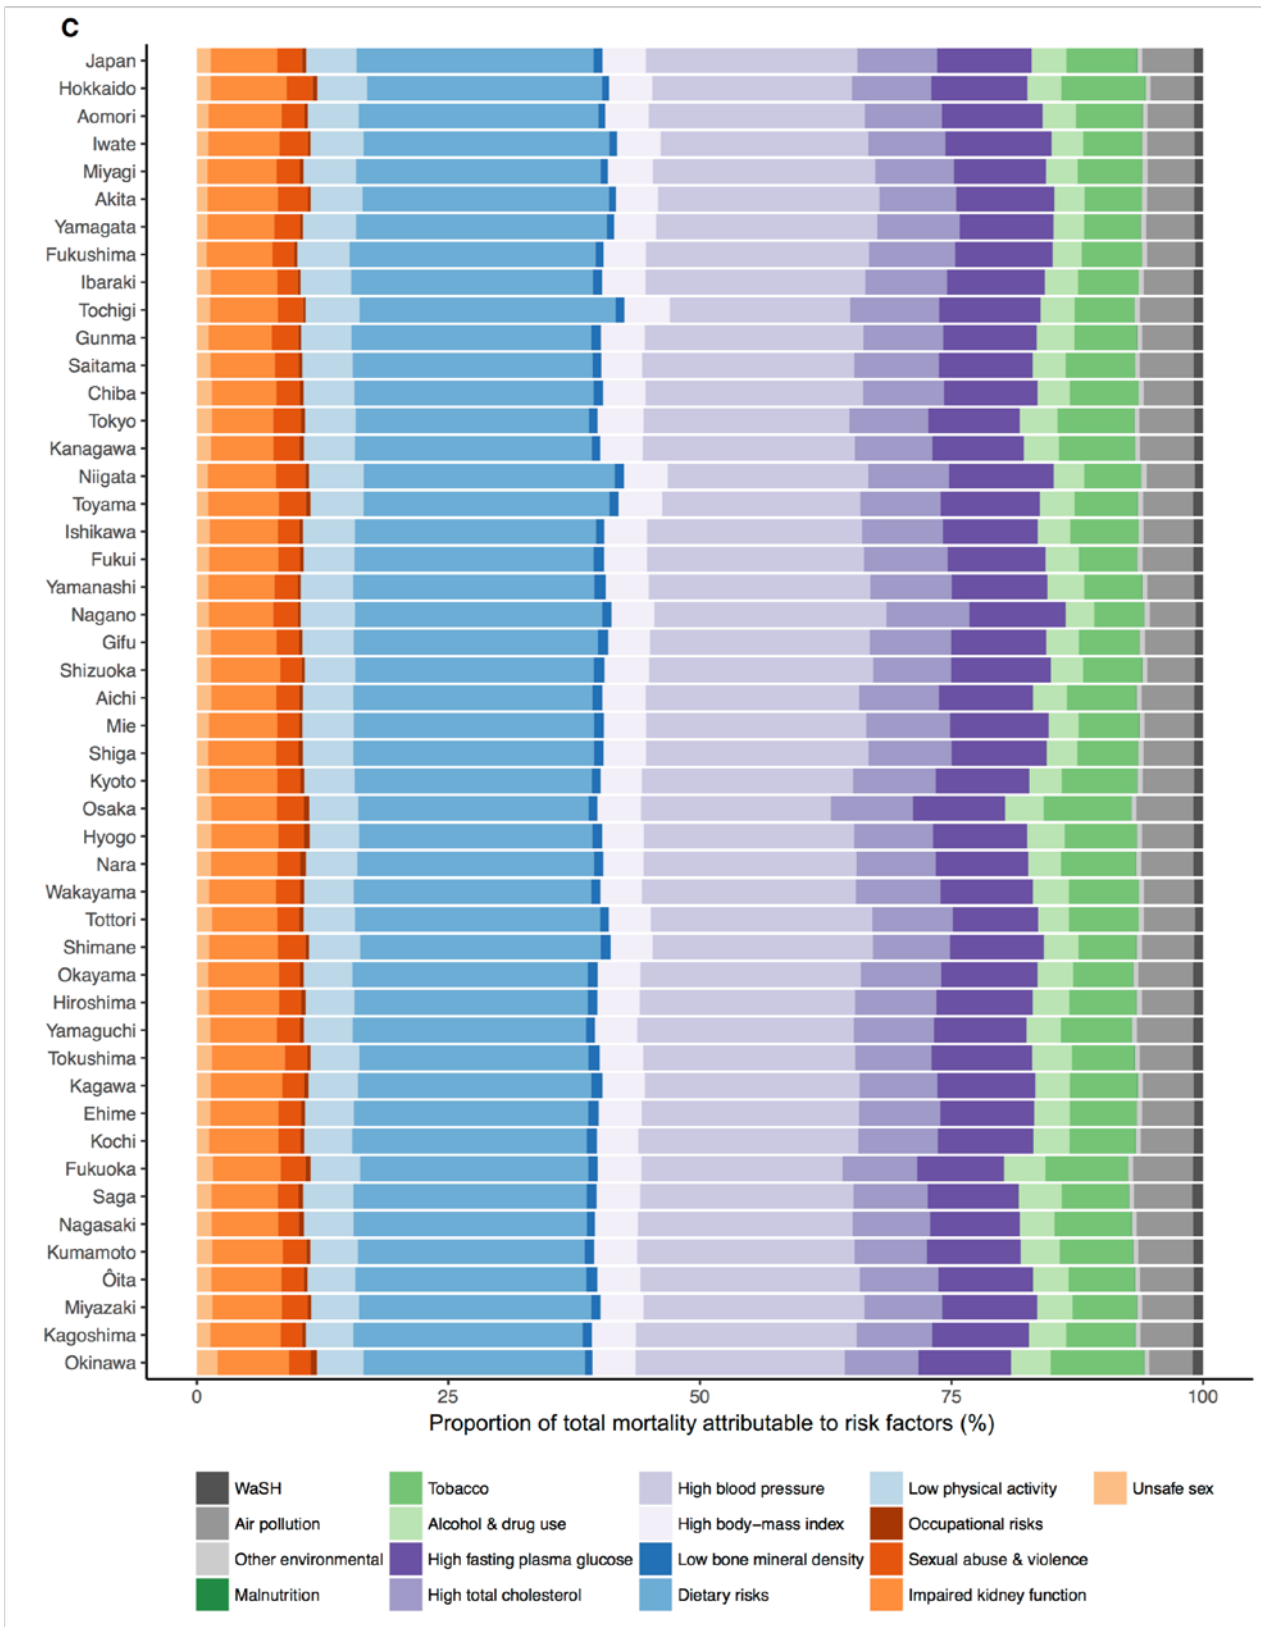

(C) Women- Japan and prefectures are ordered from north (Hokkaido) to south (Okinawa).

Web Figure 5: Association between age-standardised death rates for both sexes combined and (A) total health expenditure per capita, (B) number of physicians, (C) registered nurses, and (D) public health nurses per 100 000.

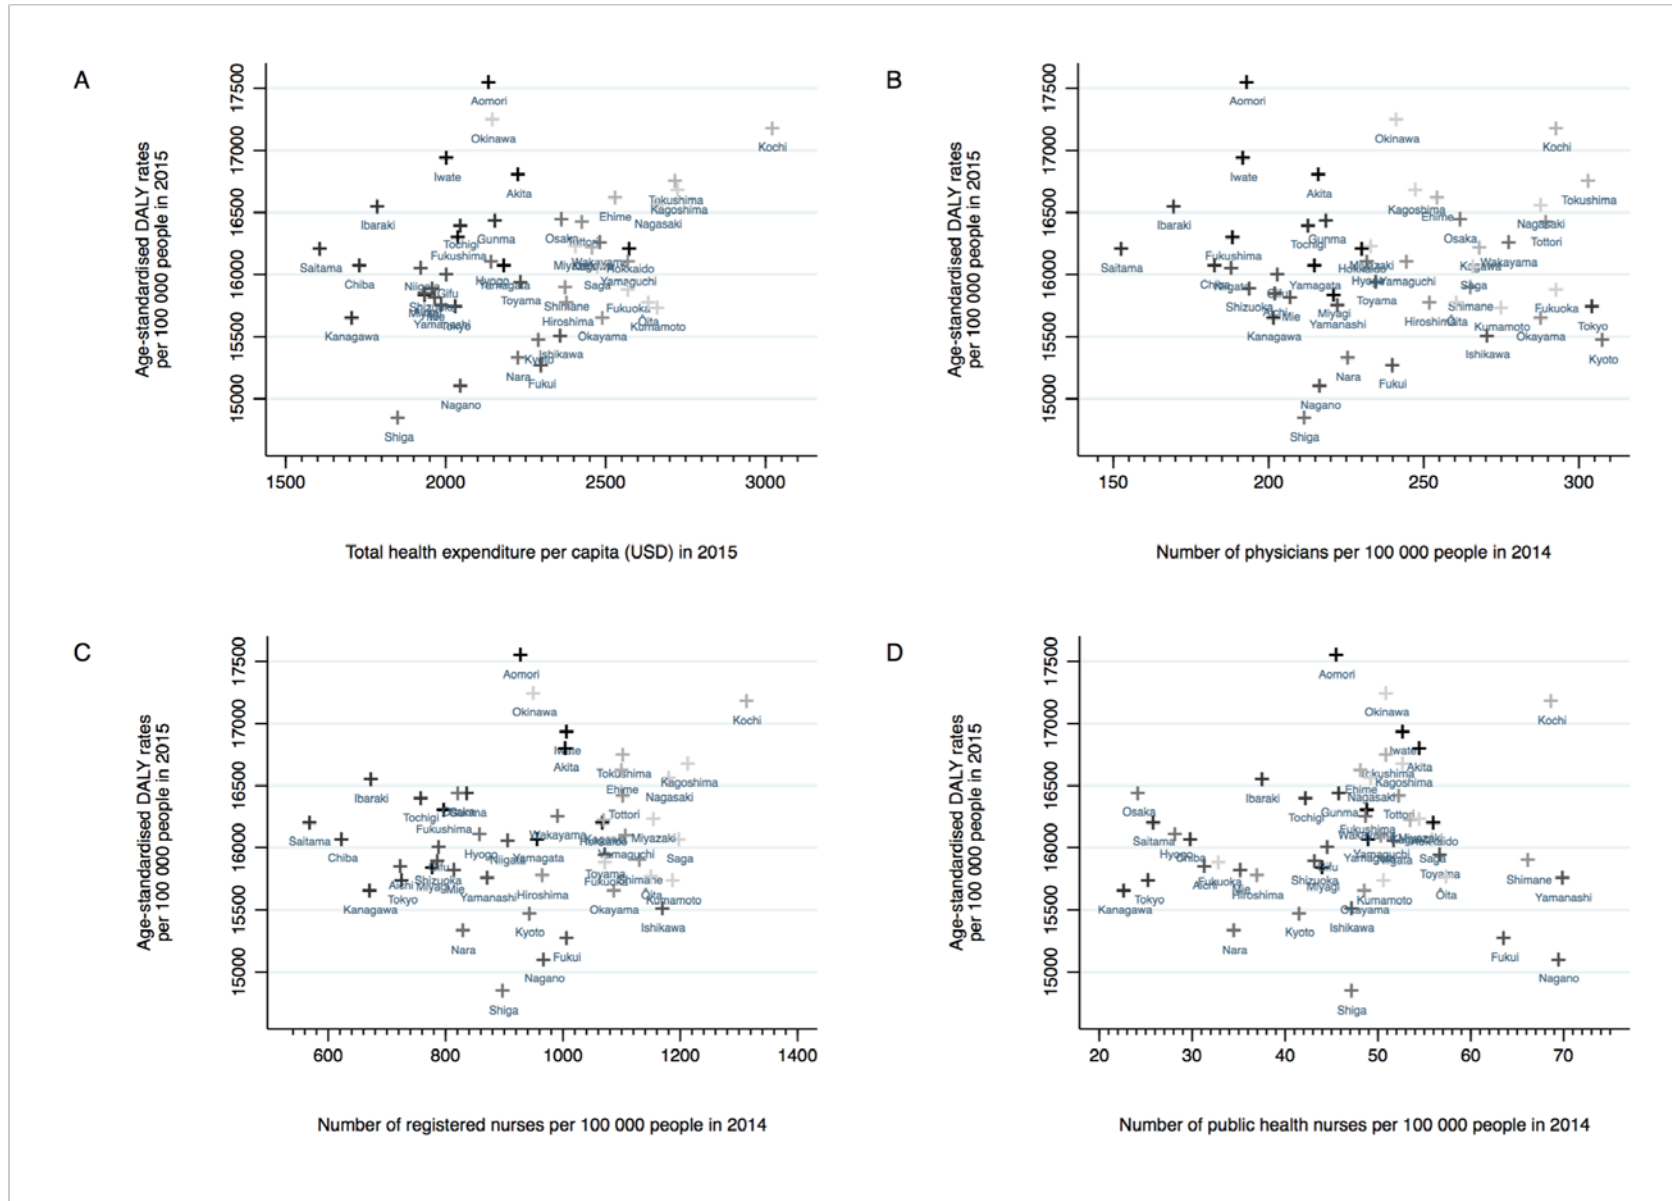

A gradation of symbols refers to the dark to light (black to white) from north (Hokkaido) to south (Okinawa).

**Web Table 1: Citation list for Japan.**

- Aarhus University, Addiction Switzerland Research Institute, Alcohol Research Group, Public Health Institute, Centre for Addiction and Mental Health (Canada), Centre for Alcohol Policy Research, Turning Point Alcohol and Drug Centre (Australia), Kettil Bruun Society for Social and Epidemiological Research on Alcohol, University of North Dakota. Japan Gender, Alcohol and Culture: An International Study (GENACIS) 2001.
- Adjusted data from: (1. Hunt GM, Oakeshott P. Outcome in people with open spina bifida at age 35: prospective community based cohort study. *BMJ*. 2003; 326(7403): 1365-6) and (2. Bowman RM, McLone DG, Grant JA, Tomita T, Ito JA. Spina bifida outcome: a 25-year prospective. *Pediatr Neurosurg*. 2001; 34(3): 114-20.)
- Agricultural Research Service, US Department of Agriculture. United States USDA National Nutrient Database for Standard Reference, Release 27. US Department of Agriculture (USDA), 2014. and FAO Supply Utilization Accounts 1961-2013. Personal Correspondence with Dr. Josef Schmidhuber, 2016. [Unpublished].
- Aichi Cancer Center Research Institute. Japan Aichi Cancer Registry Report 2006.
- Akahoshi H, Taura N, Ichikawa T, Miyaaki H, Akiyama M, Miura S, Ozawa E, Takeshita S, Muraoka T, Matsuzaki T, Ohtani M, Isomoto H, Matsumoto T, Takeshima F, Nakao K. Differences in prognostic factors according to viral status in patients with hepatocellular carcinoma. *Oncol Rep*. 2010; 23(5): 1317-23.
- Akbar SM, Onji M, Kanaoka M, Horiike N, Michitaka K, Masumoto T, Nonaka T, Kanda K, Kajino K, Kumamoto I. The seroepidemiology of hepatitis A and B in a Japanese town. *Asia Pac J Public Health*. 1992; 6(2): 26-9.
- Akizuki S. A population study of hyperuricaemia and gout in Japan—analysis of sex, age and occupational differences in thirty-four thousand people living in Nagano Prefecture. *Rheumatism*. 1982; 22(3): 201-8.
- Amagai Y, Ishikawa S, Gotoh T, Kayaba K, Nakamura Y, Kajii E. Sleep duration and incidence of cardiovascular events in a Japanese population: the Jichi Medical School cohort study. *J Epidemiol*. 2010; 20(2): 106-10.
- Ando A, Ohsawa M, Yaegashi Y, Sakata K, Tanno K, Onoda T, Itai K, Tanaka F, Makita S, Omama S, Ogasawara K, Ogawa A, Ishibashi Y, Kuribayashi T, Koyama T, Okayama A. Factors related to tooth loss among community-dwelling middle-aged and elderly Japanese men. *J Epidemiol*. 2013; 23(4): 301-6.
- Ando N, Fujimoto S, Ishikawa T, Teramoto J, Kobayashi S, Hattori A, Togari H. Prevalence and features of migraine in Japanese junior high school students aged 12-15 yr. *Brain Dev*. 2007; 29(8): 482-5.
- Aoki K, Kihai PE, Wenyuan Z, Xianghang Z, Castro M, Disla M, Nyambo TB, Misumi J. Comparison of prevalence of chronic atrophic gastritis in Japan, China, Tanzania, and the Dominican Republic. *Ann Epidemiol*. 2005; 15(8): 598-606.
- Aoki M, Hisamichi S, Tominaga S, eds. Smoking and Health 1987. Proceedings of the 6th World Conference on Smoking and Health. World Conference on Smoking and Health; 1987 Nov 9-12; Tokyo, Japan. Amsterdam, The Netherlands: Excerpta Medica, 1988.
- Aoyagi K, Kusano Y, Takamura N, Abe Y, Osaki M, Une H. Obesity and cardiovascular risk factors among men and women aged 40 years and older in a rural area of Japan. *J Physiol Anthropol*. 2006; 25(6): 371-5.
- Araki S, Uchino M, Kumamoto T. Prevalence studies of multiple sclerosis, myasthenia gravis, and myopathies in Kumamoto district, Japan. *Neuroepidemiology*. 1987; 6(3): 120-9.
- Araki S, Uchino M, Yoshida O. Epidemiologic study of multiple sclerosis, myasthenia gravis and polymyositis in the city of Kumamoto, Japan. *Clin Neurol*. 1983; 23(10): 838-41.
- Asakura K, Nishiwaki Y, Inoue N, Hibi T, Watanabe M, Takebayashi T. Prevalence of ulcerative colitis and Crohn's disease in Japan. *J Gastroenterol*. 2009; 44(7): 659-65.
- Asakura T, Tachibana K, Watanabe S, Teshima D, Ikeda M, Tokudome S. Concomitant carriage of hepatitis B virus and human T-lymphotropic virus type I among blood donors in Kitakyushu, Japan. *J Infect*. 1991; 23(1): 33-7.
- Awano S, Ansai T, Takata Y, Soh I, Akifusa S, Hamasaki T, Yoshida A, Sonoki K, Fujisawa K, Takehara T. Oral health and mortality risk from pneumonia in the elderly. *J Dent Res*. 2008; 87(4): 334-9.
- Azuma T, Ito Y, Suto H, Ohtani M, Dojo M, Muramatsu A, Kuriyama M, Kato T. The effect of *Helicobacter pylori* eradication therapy on dyspepsia symptoms in industrial workers in Japan. *Aliment Pharmacol Ther*. 2001; 15(6): 805-11.
- Baba S, Iso H, Mannami T, Sasaki S, Okada K, Konishi M. Cigarette smoking and risk of coronary heart disease incidence among middle-aged Japanese men and women: the JPHC Study Cohort I. *Eur J Cardiovasc Prev Rehabil*. 2006; 13(2): 207-13.
- Bauman A, Bull F, Chey T, Craig CL, Ainsworth BE, Sallis JF, Bowles HR, Hagstromer M, Sjostrom M, Pratt M, IPS Group. The International Prevalence Study on Physical Activity: results from 20 countries. *Int J Behav Nutr Phys Act*. 2009; 21.
- Bojesen A, Juul S, Birkebaek N, Gravholt CH. Increased mortality in Klinefelter syndrome. *J Clin Endocrinol Metab*. 2004; 89(8): 3830-4.
- Bolt, J. and J. L. van Zanden (2013). The First Update of the Maddison Project; Re-Estimating Growth Before 1820. Maddison Project Working Paper 4.
- British Geological Survey, Natural Environment Research Council. World Mineral Production 2007-2011. Nottingham, United Kingdom: British Geological Survey, Natural Environment Research Council, 2013.
- Bureau of Statistics (Japan). Japan Population and Housing Census 1985 and 1990.
- Bureau of Statistics (Japan). Japan Population and Housing Census 1990 and 1995.
- Bureau of Statistics (Japan). Japan Population and Housing Census 1990.
- Center for Cancer Control and Information Services (Japan). Japan Cancer Incidence Data 1975-2010. Tokyo, Japan: Center for Cancer Control and Information Services (Japan).
- Center for Cancer Control and Information Services (Japan). Japan Cancer Mortality Data 1958-2013. Tokyo, Japan: Center for Cancer Control and Information Services (Japan).
- Chan-it W, Thongprachum A, Dey SK, Phan TG, Khamrin P, Okitsu S, Nishimura S, Kobayashi M, Kikuta H, Baba T, Yamamoto A, Sugita K, Hashira S, Tajima T, Ishida S, Mizuguchi M, Ushijima H. Detection and genetic characterization of rotavirus infections in non-hospitalized children with acute gastroenteritis in Japan, 2007-2009. *Infect Genet Evol*. 2011; 11(2): 415-22.
- Christensen K, Juel K, Herskind AM, Murray JC. Long term follow up study of survival associated with cleft lip and palate at birth. *BMJ*. 2004; 328: 1405. and Smile Train. China and India Smile Train Congenital Anomalies Data 2004-2009.
- Curado MP, Edwards B, Shin HR, Storm H, Ferlay J, Heanue M and Boyle P, eds (2007). *Cancer Incidence in Five Continents, Vol. IX Periodic Data* (electronic version). Lyon, IARC. <http://ci5.iarc.fr>
- Daida H, Miyauchi K, Ogawa H, Yokoi H, Matsumoto M, Kitakaze M, Kimura T, Matsubara T, Ikari Y, Kimura K, Tsukahara K, Origasa H, Morino Y, Tsutsui H, Kobayashi M, Isshiki T, PACIFIC investigators. Management and two-year long-term clinical outcome of acute coronary syndrome in Japan: prevention of atherothrombotic incidents following ischemic coronary attack (PACIFIC) registry. *Circ J*. 2013; 77(4): 934-43.
- Davarian S, Crimmins E, Takahashi A, Saito Y. Sociodemographic correlates of four indices of blood pressure and hypertension among older persons in Japan. *Gerontology*. 2013; 59(5): 392-400.
- Dey SK, Thongprachum A, Ota Y, Phan TG, Nishimura S, Mizuguchi M, Okitsu S, Ushijima H. Molecular and epidemiological trend of rotavirus infection among infants and children in Japan. *Infect Genet Evol*. 2009; 9(5): 955-61.
- Doi Y, Ninomiya T, Hata J, Hirakawa Y, Mukai N, Iwase M, Kiyohara Y. Two risk score models for predicting incident Type 2 diabetes in Japan. *Diabet Med*. 2012; 29(1): 107-14.
- Doi Y, Ninomiya T, Hata J, Yonemoto K, Tanizaki Y, Arima H, Liu Y, Rahman M, Iida M, Kiyohara Y. Seroprevalence of herpes simplex virus 1 and 2 in a population-based cohort in Japan. *J Epidemiol*. 2009; 19(2): 56-62.
- Doi Y, Yokoyama T, Tango T, Takahashi K, Fujimoto K, Nakano I. Temporal trends and geographic clusters of mortality from amyotrophic lateral sclerosis in Japan, 1995-2004. *J Neurol Sci*. 2010; 298(1-2): 78-84.
- Epidemiology and Prevention Division, Research Center for Cancer Prevention and Screening, National Cancer Center (Japan). Japan Public Health Center-Based Prospective Study Five-year Follow-up 1995-1998. as it appears in Global Dietary Database Consortium, Nutrition and Chronic Disease Expert Group (NutriCoDE). Global Dietary Database 1980-2011. [Unpublished].
- Epidemiology and Prevention Division, Research Center for Cancer Prevention and Screening, National Cancer Center (Japan). Japan Public Health Center-Based Prospective Study Ten-year Follow-up 2000-2003. as it appears in Global Dietary Database Consortium, Nutrition and Chronic Disease Expert Group

- (NutriCoDE). Global Dietary Database 1980-2011. [Unpublished].
- Euromonitor International. Euromonitor Passport - Cigarette Statistics. London, United Kingdom: Euromonitor International.
- Euromonitor International. Partially Hydrogenated Vegetable Oil Sales Database.
- European Surveillance of Congenital Anomalies (EUROCAT), International Centre on Birth Defects, World Health Organization (WHO). World Atlas of Birth Defects. 2nd ed. Geneva, Switzerland: World Health Organization (WHO), 2003.
- Feenstra RC, Inklaar R, Timmer MP. The Next Generation of the Penn World Table. *American Economic Review*. 2015; 105(10): 3150-3182.
- Ferlay J, Parkin DM, Curado MP, Bray F, Edwards B, Shin HR and Forman D. Cancer Incidence in Five Continents, Volumes I to IX: IARC CancerBase No. 9 [Internet]. Lyon, France: International Agency for Research on Cancer; 2010. Available from: <http://ci5.iarc.fr>
- Finch A. Homicide in Contemporary Japan. *Br J Criminol*. 2001; 41(2): 219-35.
- Food and Agriculture Organization of the United Nations (FAO), World Health Organization (WHO). Joint WHO/FAO Workshop on Foodborne Trematode Infections in Asia. Manila, Philippines: World Health Organization Regional Office for the Western Pacific (WPRO-WHO), 2004.
- Food and Agriculture Organization of the United Nations (FAO). FAOSTAT Commodity Balances - Crops Primary Equivalent. Rome, Italy: Food and Agriculture Organization of the United Nations (FAO).
- Food and Agriculture Organization of the United Nations (FAO). FAOSTAT Food Balance Sheets, May 2013. Rome, Italy: Food and Agriculture Organization of the United Nations (FAO).
- Food and Agriculture Organization of the United Nations (FAO). FAOSTAT Food Balance Sheets, October 2014. Rome, Italy: Food and Agriculture Organization of the United Nations (FAO).
- Food and Agriculture Organization of the United Nations (FAO). FAOSTAT Production - Live Animals. Rome, Italy: Food and Agriculture Organization of the United Nations (FAO).
- Forman D, Bray F, Brewster DH, Gombe Mbalawa C, Kohler B, Piñeros M, Steliarova-Foucher E, Swaminathan R and Ferlay J, eds (2013). Cancer Incidence in Five Continents, Vol. X Summary Database (electronic version). Lyon, IARC. <http://ci5.iarc.fr>
- Frid C, Drott P, Otterblad Olausson P, Sundelin C, Annerén G. Maternal and neonatal factors and mortality in children with Down syndrome born in 1973-1980 and 1995-1998. *Acta Paediatr*. 2004; 93(1): 106-12. and Baird PA, Sadovnick AD. Life expectancy in Down syndrome. *J Pediatr*. 1987; 110(6): 849-54.
- Fujii M, Miyoshi T, Tada T, Goto H, Ishimoto H. Incidence of anemia in women in fishing villages. *Tokushima J Exp Med*. 1993; 40(3-4): 183-9. as it appears in World Health Organization (WHO). WHO Global Database on Anemia, Nutrition Landscape Information System. Geneva, Switzerland: World Health Organization (WHO).
- Fujii T, Matsudaira K. Prevalence of low back pain and factors associated with chronic disabling back pain in Japan. *Eur Spine J*. 2013; 22(2): 432-8.
- Fujimoto K, Kobayashi S, Uchiyama M, Doi M, Nakamura Y. Nationwide Indoor Radon Survey in Japan. *Hoken Butsuri*. 1997; 32(1): 41-51.
- Fujimoto M, Takeuchi K, Sugimoto M, Maruo T. Prevention of postpartum hemorrhage by uterotonic agents: comparison of oxytocin and methylergometrine in the management of the third stage of labor. *Acta Obstet Gynecol Scand*. 2006; 85(11): 1310-4.
- Fujita T, Hayashi K, Katanoda K, Matsumura Y, Lee JS, Takagi H, Suzuki S, Mizunuma H, Aso T. Prevalence of diseases and statistical power of the Japan Nurses' Health Study. *Ind Health*. 2007; 45(5): 687-94.
- Fujiwara S, Kasagi F, Masunari N, Naito K, Suzuki G, Fukunaga M. Fracture Prediction From Bone Mineral Density in Japanese Men and Women. *J Bone Miner Res*. 2003; 18(8): 1547-53.
- Fujiwara S, Kasagi F, Masunari N, Naito K, Suzuki G, Fukunaga M. Fracture Prediction From Bone Mineral Density in Japanese Men and Women. *J Bone Miner Res*. 2003; 18(8): 1547-53. as it appears in Johnell O, Kanis JA, Oden A, Johansson H, De Laet C, Delmas P, Eisman JA, Fujiwara S, Kroger H, Mellstrom D, Meunier PJ, Melton LJ 3rd, O'Neill T, Pols H, Reeve J, Silman A, Tenenhouse A. Predictive value of BMD for hip and other fractures. *J Bone Miner Res*. 2005; 20(7): 1185-94.
- Fukahori S, Matsuse H, Takamura N, Hirose H, Tsuchida T, Kawano T, Fukushima C, Mizuta Y, Kohno S. Prevalence of chronic obstructive pulmonary diseases in general clinics in terms of FEV1/FVC. *Int J Clin Pract*. 2009; 63(2): 269-74.
- Fukuyama K, Kimura Y, Wakugami K, Muratani H. Incidence and long-term prognosis of initial stroke and acute myocardial infarction in Okinawa, Japan. *Hypertens Res*. 2000; 23(2): 127-35.
- Fukuchi Y, Nishimura M, Ichinose M, Adachi M, Nagai A, Kuriyama T, Takahashi K, Nishimura K, Ishioka S, Aizawa H, Zaher C. COPD in Japan: the Nippon COPD Epidemiology study. *Respirology*. 2004; 9(4): 458-65.
- Fukuizumi K, Sata M, Suzuki H, Nakano H, Tanikawa K. Hepatitis C virus seroconversion rate in a hyperendemic area of HCV in Japan: a prospective study. *Scand J Infect Dis*. 1997; 29(4): 345-7.
- Fukunishi I, Hayabara T, Hosokawa K. Epidemiological surveys of senile dementia in Japan. *Int J Soc Psychiatry*. 1991; 37(1): 51-6.
- Fukutomi Y, Nakamura H, Kobayashi F, Taniguchi M, Konno S, Nishimura M, Kawagishi Y, Watanabe J, Komase Y, Akamatsu Y, Okada C, Tanimoto Y, Takahashi K, Kimura T, Eboshida A, Hirota R, Ikei J, Odajima H, Nakagawa T, Akasawa A, Akiyama K. Nationwide cross-sectional population-based study on the prevalences of asthma and asthma symptoms among Japanese adults. *Int Arch Allergy Immunol*. 2010; 153(3): 280-7.
- Fukutomi Y, Taniguchi M, Nakamura H, Konno S, Nishimura M, Kawagishi Y, Okada C, Tanimoto Y, Takahashi K, Akasawa A, Akiyama K. Association between body mass index and asthma among Japanese adults: risk within the normal weight range. *Int Arch Allergy Immunol*. 2012; 157(3): 281-7.
- Furusyo N, Hayashi J, Ariyama I, Sawayama Y, Etoh Y, Kashiwagi S. Lower hepatitis G virus infection prevalence compared to hepatitis B and C virus infection prevalences. *Dig Dis Sci*. 2000; 45(1): 188-95.
- Furuya S, Yokoyama E, Kumamoto Y, Aoki S, Tanaka N. Studies on incidence of benign prostatic hypertrophy and prostatic cancer in cold districts. I. Mass examination of prostate in Tanno town. *Jpn J Urol*. 1985; 76(7): 957-64.
- Global Lower Extremity Amputation Study Group. Epidemiology of lower extremity amputation in centres in Europe, North America and East Asia. The Global Lower Extremity Amputation Study Group. *Br J Surg*. 2000; 87(3): 328-37.
- Hamada H, Ogura A, Hotta C, Wakui T, Ogawa T, Terai M. [Epidemiological study of respiratory viruses detected in patients under two years old who required admission because of lower respiratory disease]. *J Jpn Assoc Infect Dis*. 2014; 88(4): 423-9.
- Hamada Y, Ohta Y, Nakane Y. [Epidemiological study of schizophrenia on the Island of Tsushima in Nagasaki Prefecture]. *Psychiatr Neurol Japonica*. 2005; 108(2): 117-31.
- Hamano-Hasegawa K, Morozumi M, Nakayama E, Chiba N, Murayama S, Takayanagi R, Iwata S, Sunakawa K, Ubukata K. Comprehensive detection of causative pathogens using real-time PCR to diagnose pediatric community-acquired pneumonia. *J Infect Chemother*. 2008; 14(6): 424-32.
- Hanioka T, Ojima M, Tanaka K, Aoyama H. Association of total tooth loss with smoking, drinking alcohol and nutrition in elderly Japanese: analysis of national database. *Gerodontology*. 2007; 24(2): 87-92.
- Hara M, Takao S, Shimazu Y, Nishimura T. Three-year study of viral etiology and features of febrile respiratory tract infections in Japanese pediatric outpatients. *Pediatr Infect Dis J*. 2014; 33(7): 687-92.
- Harada H, Nishikawa S, Takahashi K. Epidemiology of Parkinson's disease in a Japanese city. *Arch Neurol*. 1983; 40(3): 151-4.
- Harrison G, Hopper K, Craig T, Laska E, Siegel C, Wanderling J, Dube KC, Ganey K, Giel R, an der Heiden W, Holmberg SK, Janca A, Lee PW, León CA, Malhotra S, Marsella AJ, Nakane Y, Sartorius N, Shen Y, Skoda C, Thara R, Tsirkin SJ, Varma VK, Walsh D, Wiersma D. Recovery from psychotic illness: a 15- and 25-year international follow-up study. *Br J Psychiatry*. 2001; 178: 506-17.
- Hasegawa M, Bessho Y, Hosoya T, Deguchi Y. [Prevalence of intimate partner violence and related factors in a local city in Japan]. *Jpn J Public Health*. 2005; 52(5): 411-21.
- Hashido M, Kawana T, Matsunaga Y, Inouye S. Changes in prevalence of herpes simplex virus type 1 and 2 antibodies from 1973 to 1993 in the rural districts of Japan. *Microbiol Immunol*. 1999; 43(2): 177-80.
- Hashido M, Lee FK, Nahmias AJ, Tsugami H, Isomura S, Nagata Y, Sonoda S, Kawana T. An epidemiologic study of herpes simplex virus type 1 and 2 infection in Japan based on type-specific serological assays. *Epidemiol Infect*. 1998; 120(2): 179-86.
- Hata J, Ninomiya T, Hirakawa Y, Nagata M, Mukai N, Gotoh S, Fukuhara M, Ikeda F, Shikata K, Yoshida D, Yonemoto K, Kamouchi M, Kitazono T, Kiyohara Y. Secular trends in cardiovascular disease and its risk factors in Japanese: half-century data from the Hisayama Study (1961-2009). *Circulation*. 2013; 128(11): 1198-205.
- Hatada K, Okazaki Y, Yoshitake K, Takada K, Nakane Y. Further evidence of westernization of dementia prevalence in Nagasaki, Japan, and family

recognition. *Int Psychogeriatr.* 1999; 11(2): 123-38.

Hayasaka K, Tomata Y, Aida J, Watanabe T, Kakizaki M, Tsuji I. Tooth loss and mortality in elderly Japanese adults: effect of oral care. *J Am Geriatr Soc.* 2013; 61(5): 815-20.

Hayashi J, Yoshimura E, Nabeshima A, Kishihara Y, Ikematsu H, Hirata M, Maeda Y, Kashiwagi S. Seroepidemiology of hepatitis C virus infection in hemodialysis patients and the general population in Fukuoka and Okinawa, Japan. *J Gastroenterol.* 1994; 29(3): 276-81.

Hayashi R, Iwasaki M, Otani T, Wang N, Miyazaki H, Yoshiaki S, Aoki S, Koyama H, Suzuki S. Body mass index and mortality in a middle-aged Japanese cohort. *J Epidemiol.* 2005; 15(3): 70-7.

Hellén L, Salonen L, Gustafsson I. Oral health status in an adult Swedish population. Prevalence of teeth, removable dentures and occlusal supporting zones. *Swed Dent J.* 1989; 13(1-2): 45-60.

Hidaka S, Ikejima C, Kodama C, Nose M, Yamashita F, Sasaki M, Kinoshita T, Tanimukai S, Mizukami K, Takahashi H, Kakuma T, Tanaka S, Asada T. Prevalence of depression and depressive symptoms among older Japanese people: comorbidity of mild cognitive impairment and depression. *Int J Geriatr Psychiatry.* 2012; 27(3): 271-9.

Higuchi S, Matsushita S, Maesato H, Osaki Y. Japan: alcohol today. *Addiction.* 2007; 102(12): 1849-62.

Higuchi S. Mortality of Japanese female alcoholics: a comparative study with male cases. *Jpn J Alcohol Stud Drug Depend.* 1987; 22(3): 211-23.

Hijii T, Fukushige J, Igarashi H, Takahashi N, Ueda K. Life expectancy and social adaptation in individuals with Down syndrome with and without surgery for congenital heart disease. *Clin Pediatr (Phila).* 1997; 36(6): 327-32.

Hiroto T, Yoshihara A, Yano M, Ando Y, Miyazaki H. Longitudinal study on periodontal conditions in healthy elderly people in Japan. *Community Dent Oral Epidemiol.* 2002; 30(6): 409-17.

Hokama T. A study of the hemoglobin levels in breast-fed infants in one village of Okinawa prefecture. *Acta Paediatr Jpn.* 1993; 35(2): 138-40. as it appears in World Health Organization (WHO). WHO Global Database on Anemia, Nutrition Landscape Information System. Geneva, Switzerland: World Health Organization (WHO).

Honda H, Shimizu Y, Imai M, Nitto Y. Cumulative incidence of childhood autism: a total population study of better accuracy and precision. *Dev Med Child Neurol.* 2005; 47(1): 10-8.

Honda H, Shimizu Y, Misumi K, Niimi M, Ohashi Y. Cumulative incidence and prevalence of childhood autism in children in Japan. *Br J Psychiatry.* 1996; 169(2): 228-35.

Houzen H, Niino M, Hiroto T, Fukazawa T, Kikuchi S, Tanaka K, Sasaki H. Increased prevalence, incidence, and female predominance of multiple sclerosis in northern Japan. *J Neurol Sci.* 2012; 323(1-2): 117-22.

Ichida F, Suzuki S, Furuta S, Takahashi Y, Yamamoto M, Tanaka M, Yano M. Age specific prevalence of anti HA in Japan--from multi-institutional analysis. *Gastroenterol Jpn.* 1981; 16(4): 384-8.

Ichinowatari N, Tatsunuma T, Makiya H. Epidemiological study of old age mental disorders in the two rural areas of Japan. *Jpn J Psychiatry Neurol.* 1987; 41(4): 629-36.

Iguchi M, Umekawa T, Katoh Y, Kohri K, Kurita T. Prevalence of urolithiasis in Kaizuka City, Japan--an epidemiologic study of urinary stones. *Int J Urol.* 1996; 3(3): 175-9.

Iguchi Y, Kimura K, Aoki J, Kobayashi K, Terasawa Y, Sakai K, Shibasaki K. Prevalence of atrial fibrillation in community-dwelling Japanese aged 40 years or older in Japan: analysis of 41,436 non-employee residents in Kurashiki-city. *Circ J.* 2008; 72(6): 909-13.

Ihara K, Muraoka Y, Oji A, Nadaoka T. Prevalence of mood disorders according to DSM-III-R criteria in the community elderly residents in Japan. *Environ Health Prev Med.* 1998; 3(1): 44-9.

Ikeda Y, Iki M, Morita A, Aihara H, Kagamimori S, Kagawa Y, Matsuzaki T, Yoneshima H, Marumo F. Age-specific values and cutoff levels for the diagnosis of osteoporosis in quantitative ultrasound measurements at the calcaneus with SAHARA in healthy Japanese women: Japanese population-based osteoporosis (JPOS) study. *Calcif Tissue Int.* 2002; 71(1): 1-9.

Ikejima C, Hisanaga A, Meguro K, Yamada T, Ouma S, Kawamuro Y, Hyouki K, Nakashima K, Wada K, Yamada S, Watanabe I, Kakuma T, Aoyama Y, Mizukami K, Asada T. Multicentre population-based dementia prevalence survey in Japan: a preliminary report. *Psychogeriatrics.* 2012; 12(2): 120-3.

Ikematsu H, Kashiwagi S, Hayashi J, Nomura H, Kajiyama W, Tani S, Uragari Y, Goto M. A seroepidemiologic study of hepatitis A virus infections: statistical analysis of two independent cross-sectional surveys in Okinawa, Japan. *Am J Epidemiol.* 1987; 126(1): 50-4.

Iki M, Fujita Y, Tamaki J, Kouda K, Yura A, Kadowaki E, Sato Y, Moon J-S, Okamoto N, Kurumatani N. Design and baseline characteristics of a prospective cohort study for determinants of osteoporotic fracture in community-dwelling elderly Japanese men: the Fujiwara-kyo osteoporosis risk in men (FORMEN) study. *BMC Musculoskelet Disord.* 2009; 165.

Iki M, Kagamimori S, Kagawa Y, Matsuzaki T, Yoneshima H, Marumo F. Bone mineral density of the spine, hip and distal forearm in representative samples of the Japanese female population: Japanese Population-Based Osteoporosis (JPOS) Study. *Osteoporos Int.* 2001; 12(7): 529-37.

Imai E, Horio M, Watanabe T, Iseki K, Yamagata K, Hara S, Ura N, Kiyohara Y, Moriyama T, Ando Y, Fujimoto S, Konta T, Yokoyama H, Makino H, Hishida A, Matsuo S. Prevalence of chronic kidney disease in the Japanese general population. *Clin Exp Nephrol.* 2009; 13(6): 621-30.

Imai H, Nakao H, Shinohara H, Fujii Y, Tsukino H, Hamasuna R, Osada Y, Fukushima K, Inamori M, Ikenoue T, Katoh T. Population-based study of asymptomatic infection with Chlamydia trachomatis among female and male students. *Int J STD AIDS.* 2010; 21(5): 362-6.

Imamura Y, Uto H, Hiramine Y, Hosoyamada K, Ijuin S, Yoshifuku S, Miyahara H, Maenohara S, Oketani M, Ido A, Tsubouchi H. Increasing prevalence of diabetes mellitus in association with fatty liver in a Japanese population. *J Gastroenterol.* 2013.

Inoue H, Fujiki A, Origasa H, Ogawa S, Okumura K, Kubota I, Aizawa Y, Yamashita T, Atarashi H, Horie M, Ohe T, Doi Y, Shimizu A, Chishaki A, Saikawa T, Yano K, Kitabatake A, Mitamura H, Kodama I, Kamakura S. Prevalence of atrial fibrillation in the general population of Japan: An analysis based on periodic health examination. *Int J Cardiol.* 2009; 137(2): 102-7.

Inoue M, Iso H, Yamamoto S, Kurahashi N, Iwasaki M, Sasazuki S, Tsugane S, Japan Public Health Center-Based Prospective Study Group. Daily total physical activity level and premature death in men and women: results from a large-scale population-based cohort study in Japan (JPHC study). *Ann Epidemiol.* 2008; 18(7): 522-30.

Institute for Health Metrics and Evaluation. Sub-Saharan Africa Insecticide-Treated Bed Nets 1999-2008. Seattle, United States: Institute for Health Metrics and Evaluation, 2010.

International Clearinghouse for Birth Defects Monitoring Systems. Congenital Malformations Worldwide: A Report from the International Clearinghouse for Birth Defects Monitoring Systems. Amsterdam, Netherlands: Elsevier, 1991.

International Clearinghouse for Birth Defects Monitoring Systems. International Clearinghouse for Birth Defects Monitoring Systems Annual Report 2003. Rome, Italy: International Centre on Birth Defects.

International Clearinghouse for Birth Defects Surveillance and Research. International Clearinghouse for Birth Defects Surveillance and Research Annual Report 2005. Rome, Italy: International Clearinghouse for Birth Defects Surveillance and Research, 2007.

International Clearinghouse for Birth Defects Surveillance and Research. International Clearinghouse for Birth Defects Surveillance and Research Annual Report 2006. Rome, Italy: International Clearinghouse for Birth Defects Surveillance and Research, 2007.

International Clearinghouse for Birth Defects Surveillance and Research. International Clearinghouse for Birth Defects Surveillance and Research Annual Report 2009. Rome, Italy: International Clearinghouse for Birth Defects Surveillance and Research.

International Clearinghouse for Birth Defects Surveillance and Research. International Clearinghouse for Birth Defects Surveillance and Research Annual Report 2010. Rome, Italy: International Clearinghouse for Birth Defects Surveillance and Research, 2011.

International Clearinghouse for Birth Defects Surveillance and Research. International Clearinghouse for Birth Defects Surveillance and Research Annual Report 2011. Rome, Italy: International Clearinghouse for Birth Defects Surveillance and Research, 2012.

International Clearinghouse for Birth Defects Surveillance and Research. International Clearinghouse for Birth Defects Surveillance and Research Annual Report 2012. Rome, Italy: International Clearinghouse for Birth Defects Surveillance and Research, 2013.

International Labour Organization (ILO). International Labour Organization Database (ILOSTAT) - Employment by Sex and Economic Activity. International Labour Organization (ILO).

International Labour Organization (ILO). International Labour Organization Database (ILOSTAT) - Fatal Injuries by Sex and Economic Activity. International

Labour Organization (ILO).

International Monetary Fund (IMF). World Economic Outlook Database. Washington, D.C., United States: International Monetary Fund (IMF).

International Road Federation. World Road Statistics 1963-1999. Geneva, Switzerland: International Road Federation.

International Social Survey Programme (ISSP). International Social Survey Program: Environment 1993.

Ishida T, Tachibana H, Ito A, Tanaka M, Tokioka F, Furuta K, Nishiyama A, Ikeda S, Niwa T, Yoshioka H, Arita M, Hashimoto T. Clinical characteristics of severe community-acquired pneumonia among younger patients: an analysis of 18 years at a community hospital. *J Infect Chemother*. 2014; 20(8): 471-6.

Ishiguro T, Takayanagi N, Yamaguchi S, Yamakawa H, Nakamoto K, Takaku Y, Miyahara Y, Kagiya N, Kurashima K, Yanagisawa T, Sugita Y. Etiology and factors contributing to the severity and mortality of community-acquired pneumonia. *Intern Med*. 2013; 52(3): 317-24.

Ishikawa H, Kawakami N, Kessler RC, World Mental Health Japan Survey Collaborators. Lifetime and 12-month prevalence, severity and unmet need for treatment of common mental disorders in Japan: results from the final dataset of World Mental Health Japan Survey. *Epidemiol Psychiatr Sci*. 2015; 25(3): 1-13.

Ishikawa S, Kayaba K, Gotoh T, Nago N, Nakamura Y, Tsutsumi A, Kajii E. Incidence of Total Stroke, Stroke Subtypes, and Myocardial Infarction in the Japanese Population: The JMS Cohort Study. *J Epidemiol*. 2008; 18(4): 144-50.

Ishikawa T, Asano Y, Morishima T, Nagashima M, Sobue G, Watanabe K, Yamaguchi H. Epidemiology of acute childhood encephalitis. Aichi Prefecture, Japan, 1984-90. *Brain Dev*. 1993; 15(3): 192-7.

Ishikawa T, Asano Y, Morishima T, Nagashima M, Sobue G, Watanabe K, Yamaguchi H. Epidemiology of bacterial meningitis in children: Aichi Prefecture, Japan, 1984-1993. *Pediatr Neurol*. 1996; 14(3): 244-50.

Ishikuro M, Obara T, Metoki H, Ohkubo T, Yamamoto M, Akutsu K, Sakurai K, Iwama N, Katagiri M, Yagihashi K, Yaegashi N, Mori S, Suzuki M, Kuriyama S, Imai Y. Blood pressure measured in the clinic and at home during pregnancy among nulliparous and multiparous women: the BOSHI study. *Am J Hypertens*. 2013; 26(1): 141-8.

ISSP Research Group (2009): International Social Survey Programme: Health and Health Care - ISSP 2011. GESIS Data Archive, Cologne. ZA5800 Data file version 3.0.0, doi:10.4232/1.12252.

Itabashi K, Horiuchi T, Kusuda S, Kabe K, Itani Y, Nakamura T, Fujimura M, Matsuo M. Mortality rates for extremely low birth weight infants born in Japan in 2005. *Pediatrics*. 2009; 123(2): 445-50.

Ito S, Ito M, Cho MJ, Shimotohno K, Tajima K. Massive sero-epidemiological survey of hepatitis C virus: clustering of carriers on the southwest coast of Tsushima, Japan. *Jpn J Cancer Res*. 1991; 82(1): 1-3.

Itoh H, Koike A, Taniguchi K, Marumo F. Severity and pathophysiology of heart failure on the basis of anaerobic threshold (AT) and related parameters. *Jpn Circ J*. 1989; 53(2): 146-54.

Itoh K. [Study on the prevalence of Parkinson's disease: based on epidemiological surveys]. *Hokkaido J Med Sci*. 2003; 78(6): 491-501.

Itoh T, Aizawa H, Hashimoto K, Yoshida K, Kimura T, Katayama T, Koyama S, Yahara O, Kikuchi K. Prevalence of multiple sclerosis in Asahikawa, a city in northern Japan. *J Neurol Sci*. 2003; 214(1-2): 7-9.

Iwasaki M, Nakamura K, Yoshihara A, Miyazaki H. Change in bone mineral density and tooth loss in Japanese community-dwelling postmenopausal women: a 5-year cohort study. *J Bone Miner Metab*. 2012; 30(4): 447-53.

Iwasaki M, Otani T, Inoue M, Sasazuki S, Tsugane S, Japan Public Health Center-Based Prospective Study Group. Body size and risk for breast cancer in relation to estrogen and progesterone receptor status in Japan. *Ann Epidemiol*. 2007; 17(4): 304-12.

Iwase A, Araie M, Tomidokoro A, Yamamoto T, Shimizu H, Kitazawa Y. Prevalence and causes of low vision and blindness in a Japanese adult population: the Tajimi Study. *Ophthalmology*. 2006; 113(8): 1354-62.

Iwata S, Nakata S, Ukai S, Koizumi Y, Morita Y, Kuroki H, Tanaka Y, Shizuya T, Sch'edel F, Brown ML, Lawrence J. Efficacy and safety of pentavalent rotavirus vaccine in Japan: a randomized, double-blind, placebo-controlled, multicenter trial. *Hum Vaccin Immunother*. 2013; 9(8): 1626-33.

Japan - Aichi Cancer Registry 1998-2002 - CI5 as it appears in Curado MP, Edwards B, Shin HR, Storm H, Ferlay J, Heanue M and Boyle P, eds (2007). *Cancer Incidence in Five Continents, Vol. IX Periodic Data (electronic version)*. Lyon, IARC. <http://ci5.iarc.fr>

Japan - Aichi Cancer Registry 2003-2007 - CI5 as it appears in Forman D, Bray F, Brewster DH, Gombe Mbalawa C, Kohler B, Piñeros M, Steliarova-Foucher E, Swaminathan R and Ferlay J, eds (2013). *Cancer Incidence in Five Continents, Vol. X Summary Database (electronic version)*. Lyon, IARC. <http://ci5.iarc.fr>

Japan - Fukui Cancer Registry 1998-2002 - CI5 as it appears in Curado MP, Edwards B, Shin HR, Storm H, Ferlay J, Heanue M and Boyle P, eds (2007). *Cancer Incidence in Five Continents, Vol. IX Periodic Data (electronic version)*. Lyon, IARC. <http://ci5.iarc.fr>

Japan - Fukui Cancer Registry 2003-2007 - CI5 as it appears in Forman D, Bray F, Brewster DH, Gombe Mbalawa C, Kohler B, Piñeros M, Steliarova-Foucher E, Swaminathan R and Ferlay J, eds (2013). *Cancer Incidence in Five Continents, Vol. X Summary Database (electronic version)*. Lyon, IARC. <http://ci5.iarc.fr>

Japan - Fukuoka Cancer Registry 1974-1975 - CI5 as it appears in Parkin DM, International Agency for Research on Cancer, International Association of Cancer Registries. *Cancer Incidence in Five Continents. Vol. I to VIII*. Lyon, France, IARCPress, 2005.

Japan - Hiroshima Cancer Registry 1978-1980 - CI5 as it appears in Parkin DM, International Agency for Research on Cancer, International Association of Cancer Registries. *Cancer Incidence in Five Continents. Vol. I to VIII*. Lyon, France, IARCPress, 2005.

Japan - Hiroshima Cancer Registry 1981-1985 - CI5 as it appears in Parkin DM, International Agency for Research on Cancer, International Association of Cancer Registries. *Cancer Incidence in Five Continents. Vol. I to VIII*. Lyon, France, IARCPress, 2005.

Japan - Hiroshima Cancer Registry 1986-1990 - CI5 as it appears in Parkin DM, International Agency for Research on Cancer, International Association of Cancer Registries. *Cancer Incidence in Five Continents. Vol. I to VIII*. Lyon, France, IARCPress, 2005.

Japan - Hiroshima Cancer Registry 1991-1995 - CI5 as it appears in Parkin DM, International Agency for Research on Cancer, International Association of Cancer Registries. *Cancer Incidence in Five Continents. Vol. I to VIII*. Lyon, France, IARCPress, 2005.

Japan - Hiroshima Cancer Registry 1996-2000 - CI5 as it appears in Curado MP, Edwards B, Shin HR, Storm H, Ferlay J, Heanue M and Boyle P, eds (2007). *Cancer Incidence in Five Continents, Vol. IX Periodic Data (electronic version)*. Lyon, IARC. <http://ci5.iarc.fr>

Japan - Hiroshima Cancer Registry 2003-2007 - CI5 as it appears in Forman D, Bray F, Brewster DH, Gombe Mbalawa C, Kohler B, Piñeros M, Steliarova-Foucher E, Swaminathan R and Ferlay J, eds (2013). *Cancer Incidence in Five Continents, Vol. X Summary Database (electronic version)*. Lyon, IARC. <http://ci5.iarc.fr>

Japan - Miyagi Cancer Registry 1968-1971 - CI5 as it appears in Parkin DM, International Agency for Research on Cancer, International Association of Cancer Registries. *Cancer Incidence in Five Continents. Vol. I to VIII*. Lyon, France, IARCPress, 2005.

Japan - Miyagi Cancer Registry 1973-1977 - CI5 as it appears in Parkin DM, International Agency for Research on Cancer, International Association of Cancer Registries. *Cancer Incidence in Five Continents. Vol. I to VIII*. Lyon, France, IARCPress, 2005.

Japan - Miyagi Cancer Registry 1978-1981 - CI5 as it appears in Parkin DM, International Agency for Research on Cancer, International Association of Cancer Registries. *Cancer Incidence in Five Continents. Vol. I to VIII*. Lyon, France, IARCPress, 2005.

Japan - Miyagi Cancer Registry 1978-1982 - CI5 as it appears in Parkin DM, International Agency for Research on Cancer, International Association of Cancer Registries. *Cancer Incidence in Five Continents. Vol. I to VIII*. Lyon, France, IARCPress, 2005.

Japan - Miyagi Cancer Registry 1983-1987 - CI5 as it appears in Parkin DM, International Agency for Research on Cancer, International Association of Cancer Registries. *Cancer Incidence in Five Continents. Vol. I to VIII*. Lyon, France, IARCPress, 2005.

Japan - Miyagi Cancer Registry 1988-1992 - CI5 as it appears in Curado MP, Edwards B, Shin HR, Storm H, Ferlay J, Heanue M and Boyle P, eds (2007). *Cancer Incidence in Five Continents, Vol. IX Periodic Data (electronic version)*. Lyon, IARC. <http://ci5.iarc.fr>

Japan - Miyagi Cancer Registry 1988-1992 - CI5 as it appears in Parkin DM, International Agency for Research on Cancer, International Association of Cancer Registries. *Cancer Incidence in Five Continents. Vol. I to VIII*. Lyon, France, IARCPress, 2005.

Japan - Miyagi Cancer Registry 1993-1997 - CI5 as it appears in Parkin DM, International Agency for Research on Cancer, International Association of Cancer Registries. *Cancer Incidence in Five Continents. Vol. I to VIII*. Lyon, France, IARCPress, 2005.

Japan - Miyagi Cancer Registry 1998-2002 - CI5 as it appears in Curado MP, Edwards B, Shin HR, Storm H, Ferlay J, Heanue M and Boyle P, eds (2007). *Cancer Incidence in Five Continents, Vol. IX Periodic Data (electronic version)*. Lyon, IARC. <http://ci5.iarc.fr>

Japan - Miyagi Cancer Registry 2003-2007 - CI5 as it appears in Forman D, Bray F, Brewster DH, Gombe Mbalawa C, Kohler B, Piñeros M, Steliarova-Foucher E, Swaminathan R and Ferlay J, eds (2013). *Cancer Incidence in Five Continents, Vol. X Summary Database (electronic version)*. Lyon, IARC.







- Version 4.04. Sutton, United Kingdom: P.N. Lee Statistics and Computing Ltd, 2009.
- Japan Tobacco, Inc.. Japan Smoking Rate Survey 1997. as it appears in P.N. Lee Statistics and Computing Ltd. International Mortality and Smoking Statistics Version 4.04. Sutton, United Kingdom: P.N. Lee Statistics and Computing Ltd, 2009.
- Japan Tobacco, Inc.. Japan Smoking Rate Survey 1998. as it appears in P.N. Lee Statistics and Computing Ltd. International Mortality and Smoking Statistics Version 4.04. Sutton, United Kingdom: P.N. Lee Statistics and Computing Ltd, 2009.
- Japan Tobacco, Inc.. Japan Smoking Rate Survey 1999. as it appears in P.N. Lee Statistics and Computing Ltd. International Mortality and Smoking Statistics Version 4.04. Sutton, United Kingdom: P.N. Lee Statistics and Computing Ltd, 2009.
- Japan Tobacco, Inc.. Japan Smoking Rate Survey 2000. as it appears in P.N. Lee Statistics and Computing Ltd. International Mortality and Smoking Statistics Version 4.04. Sutton, United Kingdom: P.N. Lee Statistics and Computing Ltd, 2009.
- Japan Tobacco, Inc.. Japan Smoking Rate Survey 2001. as it appears in P.N. Lee Statistics and Computing Ltd. International Mortality and Smoking Statistics Version 4.04. Sutton, United Kingdom: P.N. Lee Statistics and Computing Ltd, 2009.
- Japan Tobacco, Inc.. Japan Smoking Rate Survey 2002. as it appears in P.N. Lee Statistics and Computing Ltd. International Mortality and Smoking Statistics Version 4.04. Sutton, United Kingdom: P.N. Lee Statistics and Computing Ltd, 2009.
- Japan Tobacco, Inc.. Japan Smoking Rate Survey 2003. as it appears in P.N. Lee Statistics and Computing Ltd. International Mortality and Smoking Statistics Version 4.04. Sutton, United Kingdom: P.N. Lee Statistics and Computing Ltd, 2009.
- Japan Tobacco, Inc.. Japan Smoking Rate Survey 2004. as it appears in P.N. Lee Statistics and Computing Ltd. International Mortality and Smoking Statistics Version 4.04. Sutton, United Kingdom: P.N. Lee Statistics and Computing Ltd, 2009.
- Japan Tobacco, Inc.. Japan Smoking Rate Survey 2005. as it appears in P.N. Lee Statistics and Computing Ltd. International Mortality and Smoking Statistics Version 4.04. Sutton, United Kingdom: P.N. Lee Statistics and Computing Ltd, 2009.
- Japan Tobacco, Inc.. Japan Smoking Rate Survey 2006. as it appears in P.N. Lee Statistics and Computing Ltd. International Mortality and Smoking Statistics Version 4.04. Sutton, United Kingdom: P.N. Lee Statistics and Computing Ltd, 2009.
- Japan Vital Registration - Deaths 1972 ICD8 as it appears in World Health Organization (WHO). WHO Mortality Database Version July 2012. Geneva, Switzerland: World Health Organization (WHO), 2012.
- Japan Vital Registration - Deaths 1973 ICD8 as it appears in World Health Organization (WHO). WHO Mortality Database Version July 2012. Geneva, Switzerland: World Health Organization (WHO), 2012.
- Japan Vital Registration - Deaths 1974 ICD8 as it appears in World Health Organization (WHO). WHO Mortality Database Version July 2012. Geneva, Switzerland: World Health Organization (WHO), 2012.
- Japan Vital Registration - Deaths 1975 ICD8 as it appears in World Health Organization (WHO). WHO Mortality Database Version July 2012. Geneva, Switzerland: World Health Organization (WHO), 2012.
- Japan Vital Registration - Deaths 1976 ICD8 as it appears in World Health Organization (WHO). WHO Mortality Database Version July 2012. Geneva, Switzerland: World Health Organization (WHO), 2012.
- Japan Vital Registration - Deaths 1977 ICD8 as it appears in World Health Organization (WHO). WHO Mortality Database Version July 2012. Geneva, Switzerland: World Health Organization (WHO), 2012.
- Japan Vital Registration - Deaths 1978 ICD8 as it appears in World Health Organization (WHO). WHO Mortality Database Version July 2012. Geneva, Switzerland: World Health Organization (WHO), 2012.
- Japan Vital Registration Birth Data 1990. as it appears in United Nations Statistics Division (UNSD). United Nations Demographic Yearbook - Historical Supplement 1997. New York City, United States: United Nations Statistics Division (UNSD).
- Jee SH, Sull JW, Park J, Lee SY, Ohrr H, Guallar E, Samet JM. Body-mass index and mortality in Korean men and women. *N Engl J Med.* 2006; 355(8): 779-87. as it appears in Thun MJ, Hannan LM, Adams-Campbell LL, Boffetta P, Buring JE, Feskanich D, Flanders WD, Jee SH, Katanoda K, Kolonel LN, Lee IM, Marugame T, Palmer JR, Riboli E, Sobue T, Avila-Tang E, Wilkens LR, Samet JM. Lung cancer occurrence in never-smokers: an analysis of 13 cohorts and 22 cancer registry studies. *PLoS Med.* 2008; 5(9): e185.
- Joint United Nations Program on HIV/AIDS (UNAIDS), Ministry of Health, Labour and Welfare (Japan). Japan Report to UNAIDS: HIV/AIDS Trends 2015. Geneva, Switzerland: Joint United Nations Program on HIV/AIDS (UNAIDS), 2015.
- Joint United Nations Program on HIV/AIDS (UNAIDS). Japan Report to UNAIDS--HIV/AIDS Trends 2012. Geneva, Switzerland: Joint United Nations Program on HIV/AIDS (UNAIDS), 2012.
- Kabeya Y, Kato M, Isogawa A, Takahashi Y, Matsushita Y, Goto A, Iso H, Inoue M, Mizoue T, Tsugane S, Kadowaki T, Noda M. Descriptive epidemiology of diabetes prevalence and HbA1c distributions based on a self-reported questionnaire and a health checkup in the JPHC diabetes study. *J Epidemiol.* 2014; 24(6): 460-8.
- Kadota A, Hozawa A, Okamura T, Kadowak T, Nakamura K, Murakami Y, Hayakawa T, Kita Y, Okayama A, Nakamura Y, Kashiwagi A, Ueshima H, NIPPON DATA Research Group. Relationship between metabolic risk factor clustering and cardiovascular mortality stratified by high blood glucose and obesity: NIPPON DATA90, 1990-2000. *Diabetes Care.* 2007; 30(6): 1533-8.
- Kageoka T, Satoh C, Goriki K, Fujita M, Neriishi S, Yamamura K, Kaneko J, Masunari N. Electrophoretic variants of blood proteins in Japanese. IV. Prevalence and enzymologic characteristics of glucose-6-phosphate dehydrogenase variants in Hiroshima and Nagasaki. *Hum Genet.* 1985; 70(2): 101-8.
- Kagiya S, Takata Y, Ansai T, Matsumura K, Soh I, Awano S, Sonoki K, Yoshida A, Torisu T, Hamasaki T, Nakamichi I, Takehara T, Iida M. Does decreased diastolic blood pressure associate with increased mortality in 80-year-old Japanese?. *Clin Exp Hypertens.* 2009; 31(8): 639-47.
- Kamada M, Kitayuguchi J, Lee IM, Hamano T, Imamura F, Inoue S, Miyachi M, Shiwaku K. Relationship between physical activity and chronic musculoskeletal pain among community-dwelling Japanese adults. *J Epidemiol.* 2014; 24(6): 474-83.
- Kamei S, Takasu T. Nationwide survey of the annual prevalence of viral and other neurological infections in Japanese inpatients. *Intern Med.* 2000; 39(11): 894-900.
- Kaneko A, Kaneita Y, Yokoyama E, Miyake T, Harano S, Suzuki K, Ibuka E, Tsutsui T, Yuko Yamamoto, Ohida T. Factors associated with exclusive breast-feeding in Japan: for activities to support child-rearing with breast-feeding. *J Epidemiol.* 2006; 16(2): 57-63.
- Kasamatsu T, Morioka S, Hashimoto T, Kinoshita H, Yamada H, Tamaki T. Epidemiological study on the bone mineral density of inhabitants in Miyama Village, Wakayama prefecture (Part I) background of study population and sampling method. *J Bone Miner Metab.* 1991; 9(1): 50-5.
- Kashiwagi S, Hayashi J, Ikematsu H, Nomura H, Kajiyama W, Ikematsu W, Shingu T, Hayashida K, Kaji M. Prevalence of immunologic markers of hepatitis A and B infection in hospital personnel in Miyazaki Prefecture, Japan. *Am J Epidemiol.* 1985; 122(6): 960-9.
- Kashiwagi S, Hayashi J, Nomura H, Kajiyama W, Ikematsu H, Noguchi A. Changing pattern of intrafamilial transmission of hepatitis B virus in Okinawa, Japan. *Am J Epidemiol.* 1988; 127(4): 783-7.
- Kawada T, Otsuka T, Endo T, Kon Y. Prevalence of the metabolic syndrome and its relationship with diabetes mellitus by aging. *Aging Male.* 2011; 14(3): 203-6.
- Kawakami N, Shimizu H, Haratani T, Iwata N, Kitamura T. Lifetime and 6-month prevalence of DSM-III-R psychiatric disorders in an urban community in Japan. *Psychiatry Res.* 2004; 121(3): 293-301.
- Kawakami N, Takeshima T, Ono Y, Uda H, Hata Y, Nakane Y, Nakane H, Iwata N, Furukawa TA, Kikkawa T. Twelve-month prevalence, severity, and treatment of common mental disorders in communities in Japan: preliminary finding from the World Mental Health Japan Survey 2002-2003. *Psychiatry Clin Neurosci.* 2005; 59(4): 441-52.
- Kawamura M, Kimura Y, Takahashi K, Satoh N, Oku K, Adachi T, Nakajima J, Murooka M, Fujiwara T, Hiramori K. Relation of Urinary Sodium Excretion to Blood Pressure, Glucose Metabolism, and Lipid Metabolism in Residents of an Area of Japan with High Sodium Intake. *Hypertens Res.* 1997; 20(4): 287-93. as it appears in Global Dietary Database Consortium, Nutrition and Chronic Disease Expert Group (NutriCoDE). Global Dietary Database 1980-2011. [Unpublished].
- Kawamura T, Shioiri T, Takahashi K, Ozdemir V, Someya T. Survival rate and causes of mortality in the elderly with depression: a 15-year prospective study of a Japanese community sample, the Matsunoyama-Niigata suicide prevention project. *J Invest Med.* 2007; 55(3): 106-14.
- Kawashita Y, Kitamura M, Saito T. Monitoring time-related trends in dental caries in permanent teeth in Japanese national surveys. *Int Dent J.* 2012; 62(2): 100-5.

- Kessler RC, Birnbaum HG, Shahly V, Bromet E, Hwang I, McLaughlin KA, Sampson N, Andrade LH, de Girolamo G, Demyttenaere K, Haro JM, Karam AN, Kostyuchenko S, Kovess V, Lara C, Levinson D, Matschinger H, Nakane Y, Browne MO, Ormel J, Posada-Villa J, Sagar R, Stein DJ. Age differences in the prevalence and co-morbidity of DSM-IV major depressive episodes: results from the WHO World Mental Health Survey Initiative. *Depress Anxiety*. 2010; 27(4): 351–64.
- Kettl Bruun Society for Social and Epidemiological Research on Alcohol, University of North Dakota, Aarhus University, Alcohol Research Group/Public Health Institute, Centre for Addiction and Mental Health, University of Melbourne, Swiss Institute for the Prevention of Alcohol and Drug Problems. Gender, Alcohol, and Culture: an International Study (GENACIS) Childhood Sexual Abuse and Intimate Partner Violence Data as provided by the Global Burden of Disease 2010 Childhood Sexual Abuse and Intimate Partner Violence Expert Group. [Unpublished].
- Kida K, Mimura G, Ito T, Murakami K, Ashkenazi I, Laron Z. Incidence of Type 1 diabetes mellitus in children aged 0-14 in Japan, 1986-1990, including an analysis for seasonality of onset and month of birth: JDS study. The Data Committee for Childhood Diabetes of the Japan Diabetes Society (JDS). *Diabet Med*. 2000; 17(1): 59-63.
- Kimira M, Kudo Y, Takachi R, Haba R, Watanabe S. [Associations between dietary intake and urinary excretion of sodium, potassium, phosphorus, magnesium, and calcium]. *Jpn J Hyg*. 2004; 59(1): 23-30. as it appears in Global Dietary Database Consortium, Nutrition and Chronic Disease Expert Group (NutriCoDE). Global Dietary Database 1980-2011. [Unpublished].
- Kimura M, Yoshino K, Nanba E, Ieshima A, Narai S, Takeshita K. Unprovoked Seizures and Epilepsies in Kurayoshi, Japan. *J Epilepsy*. 1998; 11(3): 162-7.
- Kita Y, Okayama A, Ueshima H, Wada M, Nozaki A, Choudhary SR, Bonita R, Inamoto Y, Kasamatsu T. Stroke incidence and case fatality in Shiga, Japan 1989-1993. *Int J Epidemiol*. 1999; 28(6): 1059-65.
- Kita Y, Turin TC, Ichikawa M, Sugihara H, Morita Y, Tomioka N, Rumana N, Okayama A, Nakamura Y, Abbott RD, Ueshima H. Trend of stroke incidence in a Japanese population: Takashima stroke registry, 1990-2001. *Int J Stroke*. 2009; 4(4): 241-9.
- Kitahara H, Ye Z, Aoyagi K, Ross PD, Abe Y, Honda S, Kanagae M, Mizukami S, Kusano Y, Tomita M, Shindo H, Osaki M. Associations of vertebral deformities and osteoarthritis with back pain among Japanese women: the Hizen-Oshima study. *Osteoporos Int*. 2013; 24(3): 907-15.
- Kitahora T, Utsunomiya T, Yokota A. Epidemiological study of ulcerative colitis in Japan: incidence and familial occurrence. The Epidemiology Group of the Research Committee of Inflammatory Bowel Disease in Japan. *J Gastroenterol*. 1995; 5-8.
- Kitamura M, Takeda T, Koga S, Nagase S, Yaegashi N. Relationship between premenstrual symptoms and dysmenorrhea in Japanese high school students. *Arch Womens Ment Health*. 2012; 15(2): 131-3.
- Kitano M, Sakaguchi K, Miyashita M, Mouri H, Senoh T, Nishimura M, Ohta T, Fujio K, Shimomura H, Tsuji T. Prevalence of hepatitis G virus (HGV) infection in an endemic area of hepatitis C virus (HCV) infection. *Hepatogastroenterology*. 2000; 47(35): 1340-2.
- Kiyohara T, Sato T, Totsuka A, Miyamura T, Ito T, Yoneyama T. Shifting seroepidemiology of hepatitis A in Japan, 1973-2003. *Microbiol Immunol*. 2007; 51(2): 185-91.
- Kiyohara T, Satoh T, Yamamoto H, Totsuka A, Moritsugu Y. The latest seroepidemiological pattern of hepatitis A in Japan. *Jpn J Med Sci Biol*. 1997; 50(3): 123-31.
- Kiyosawa K, Oofusa H, Saitoh H, Sodeyama T, Tanaka E, Furuta S, Itoh S, Ogata H, Kobuchi H, Kameko M. Seroepidemiology of hepatitis A, B, and D viruses and human T-lymphocyte tropic viruses in Japanese drug abusers. *J Med Virol*. 1989; 29(3): 160-3.
- Kobayashi J, Nishimura K, Matoba M, Maekawa N, Mabuchi H. Generation and Gender Differences in the Components Contributing to the Diagnosis of the Metabolic Syndrome According to the Japanese Criteria. *Circ J*. 2007; 71(11): 1734-7.
- Kobayashi Y, Niu K, Guan L, Momma H, Guo H, Cui Y, Nagatomi R. Oral health behavior and metabolic syndrome and its components in adults. *J Dent Res*. 2012; 91(5): 479–84.
- Koide T, Ohno T, Huang XE, Iijima Y, Sugihara K, Mizokami M, Xiang J, Tokudome S. HBV/HCV Infection, Alcohol, Tobacco and Genetic Polymorphisms for Hepatocellular Carcinoma in Nagoya, Japan. *Asian Pac J Cancer Prev*. 2000; 1(3): 237-43.
- Komahashi T, Ohmori K, Nakano T, Fujinuma H, Higashimoto T, Nakaya M, Kuroda J, Asahi H, Yoshikawa J, Matsumura S. Epidemiological survey of dementia and depression among the aged living in the community in Japan. *Jpn J Psychiatry Neurol*. 1994; 48(3): 517-26.
- Kouda K, Nakamura H, Tokunaga R, Takeuchi H. Trends in levels of cholesterol in Japanese children from 1993 through 2001. *J Epidemiol*. 2004; 14(3): 78-82.
- Kubo M, Kiyohara Y, Kato I, Tanizaki Y, Arima H, Tanaka K, Nakamura H, Okubo K, Iida M. Trends in the Incidence, Mortality, and Survival Rate of Cardiovascular Disease in a Japanese Community. *Stroke*. 2003; 34(10): 2349-54.
- Kubo S, Nishiguchi S, Hirohashi K, Tanaka H, Tsukamoto T, Hamba H, Shuto T, Okuda T, Tamori A, Kuroki T, Kinoshita H. High prevalence of infection with hepatitis B and C viruses in patients with hepatocellular carcinoma in Japan. *Hepatogastroenterology*. 1999; 46(25): 357-9.
- Kumakawa T, Suzuki S, Fujii H, Miwa S. Frequency of glucose 6-phosphate dehydrogenase (G6PD) deficiency in Tokyo and a new variant: G6PD Musashino. *J Jpn Haematol Soc*. 1987; 50(1): 25-8.
- Kurihama Alcoholism Center (Japan), National Hospital Organization (Japan). Japan Survey on Adult Drinking Patterns and Prevention for Related Problems 2003.
- Kuriyama S, Tsubono Y, Hozawa A, Shimazu T, Suzuki Y, Koizumi Y, Suzuki Y, Ohmori K, Nishino Y, Tsuji I. Obesity and risk of cancer in Japan. *Int J Cancer*. 2005; 113(1): 148–57.
- Kuroda K, Tatara K, Shinsho H, Okamoto E, Cho R, Nishigaki C, Takatorige T, Nakanishi N, Aoki T. [A study of attitudes toward illness and its effect on mortality in patients with Parkinson's disease]. *Jpn J Public Health*. 1990; 37(5): 333-9.
- Kurosaka F, Terada T, Tanaka A, Nakatani Y, Yamada K, Nishikawa J, Oka K, Takahashi H, Mogami A, Yamada T, Nakano T, Shima M, Nishio H. Risk factors for wheezing, eczema and rhinoconjunctivitis in the previous 12 months among six-year-old children in Himeji City, Japan: food allergy, older siblings, day-care attendance and parental allergy history. *Allergol Int*. 2011; 60(3): 317-30.
- Kusumi M, Nakashima K, Nakayama H, Takahashi K. Epidemiology of inflammatory neurological and inflammatory neuromuscular diseases in Tottori Prefecture, Japan. *Psychiatry Clin Neurosci*. 1995; 49(3): 169-74.
- Kusunoki T, Morimoto T, Nishikomori R, Yasumi T, Heike T, Fujii T, Nakahata T. Changing Prevalence and Severity of Childhood Allergic Diseases in Kyoto, Japan, from 1996 to 2006. *Allergol Int*. 2009; 58(4): 543–8.
- Kuzuya T, Akanuma Y, Akazawa Y, Uehata T. Prevalence of chronic complications in Japanese diabetic patients. *Diabetes Res Clin Pract*. 1994; 24(Suppl): S159-64.
- Lai CK, Beasley R, Crane J, Foliaki S, Shah J, Weiland S. Global variation in the prevalence and severity of asthma symptoms: phase three of the International Study of Asthma and Allergies in Childhood (ISAAC). *Thorax*. 2009; 64(6): 476-483.
- Landis SH, Muellerova H, Mannino DM, Menezes AM, Han MK, van der Molen T, Ichinose M, Aisanov Z, Oh YM, Davis KJ. Continuing to Confront COPD International Patient Survey: methods, COPD prevalence, and disease burden in 2012-2013. *Int J Chron Obstruct Pulmon Dis*. 2014; 597-611.
- League of Arab States, Palestinian Central Bureau of Statistics, United Nations Children's Fund (UNICEF). Palestine Family Health Survey 2006-2007.
- Lee G. End-stage renal disease in the Asian-Pacific region. *Semin Nephrol*. 2003; 23(1): 107-14.
- Lee K-J, Inoue M, Otani T, Iwasaki M, Sasazuki S, Tsugane S, JPHC Study Group. Physical activity and risk of colorectal cancer in Japanese men and women: the Japan Public Health Center-based prospective study. *Cancer Causes Control*. 2007; 18(2): 199-209.
- Liu L, Mizushima S, Ikeda K, Hattori H, Miura A, Gao M, Nara Y, Yamori Y. Comparative Studies of Diet-Related Factors and Blood Pressure among Chinese and Japanese: Results from the China-Japan Cooperative Research of the WHO-CARDIAC Study. *Hypertens Res*. 2000; 23(5): 413-20. as it appears in Global Dietary Database Consortium, Nutrition and Chronic Disease Expert Group (NutriCoDE). Global Dietary Database 1980-2011. [Unpublished].
- Maeda M, Yamamoto M, Yamauchi K. Prevalence of anemia in Japanese adolescents: 30 years' experience in screening for anemia. *Int J Hematol*. 1999; 69(2): 75-80. as it appears in World Health Organization (WHO). WHO Global Database on Anemia, Nutrition Landscape Information System. Geneva, Switzerland: World Health Organization (WHO).
- Malaria Atlas Project. Spatial Distribution of Plasmodium Falciparum Malaria Endemicity Map 2010. Oxford, United Kingdom: Malaria Atlas Project.
- Mannami T, Baba S, Ogata J. Potential of Carotid Enlargement as a Useful Indicator Affected by High Blood Pressure in a Large General Population of a Japanese City The Suita Study. *Stroke*. 2000; 31(12): 2958-65.
- Marugame T, Sobue T, Satoh H, Komatsu S, Nishino Y, Nakatsuka H, Nakayama T, Suzuki T, Takezaki T, Tajima K, Tominaga S. Lung cancer death rates by

smoking status: comparison of the Three-Prefecture Cohort study in Japan to the Cancer Prevention Study II in the USA. *Cancer Sci.* 2005; 96(2): 120-6. as it appears in Thun MJ, Hannan LM, Adams-Campbell LL, Boffetta P, Buring JE, Feskanich D, Flanders WD, Jee SH, Katanoda K, Kolonel LN, Lee IM, Marugame T, Palmer JR, Riboli E, Sobue T, Avila-Tang E, Wilkens LR, Samet JM. Lung cancer occurrence in never-smokers: an analysis of 13 cohorts and 22 cancer registry studies. *PLoS Med.* 2008; 5(9): e185.

Maruyama T, Gabazza EC, Morser J, Takagi T, D'Alessandro-Gabazza C, Hirohata S, Nakayama S, Ramirez AY, Fujiwara A, Naito M, Nishikubo K, Yuda H, Yoshida M, Takei Y, Taguchi O. Community-acquired pneumonia and nursing home-acquired pneumonia in the very elderly patients. *Respir Med.* 2010; 104(4): 584-92.

Maruyama T, Niederman MS, Kobayashi T, Kobayashi H, Takagi T, D'Alessandro-Gabazza CN, Fujimoto H, Gil Bernabe P, Hirohata S, Nakayama S, Nishikubo K, Yuda H, Yamaguchi A, Gabazza EC, Noguchi T, Takei Y, Taguchi O. A prospective comparison of nursing home-acquired pneumonia with hospital-acquired pneumonia in non-intubated elderly. *Respir Med.* 2008; 102(9): 1287-95.

Masakane I, Nakai S, Ogata S, Kimata N, Hanafusa N, Hamano T, Wakai K, Wada A, Nitta K. An Overview of Regular Dialysis Treatment in Japan (As of 31 December 2013). *Ther Apher Dial.* 2015; 19(6): 540-74.

Matsushita Y, Takahashi Y, Mizoue T, Inoue M, Noda M, Tsugane S, JPHC Study Group. Overweight and obesity trends among Japanese adults: a 10-year follow-up of the JPHC Study. *Int J Obes (Lond).* 2008; 32(12): 1861-7.

Max Planck Institute for Demographic Research, University of California, Berkeley. Japan Human Mortality Database Exposure-to-Risk Period Data.

Mayanagi H, Saito T, Kamiyama K. Cross-sectional comparisons of caries time trends in nursery school children in Sendai, Japan. *Community Dent Oral Epidemiol.* 1995; 23(6): 344-9.

Meguro K, Tanaka N, Kasai M, Nakamura K, Ishikawa H, Nakatsuka M, Satoh M, Ouchi Y. Prevalence of dementia and dementing diseases in the old-old population in Japan: the Kurihara Project. Implications for Long-Term Care Insurance data. *Psychogeriatrics.* 2012; 12(4): 226-34.

Merikangas KR, Jin R, He J-P, Kessler RC, Lee S, Sampson NA, Viana MC, Andrade LH, Hu C, Karam EG, Ladea M, Medina-Mora ME, Ono Y, Posada-Villa J, Sagar R, Wells JE, Zarkov Z. Prevalence and correlates of bipolar spectrum disorder in the World Mental Health Survey Initiative. *Arch Gen Psychiatry.* 2011; 68(3): 241-51.

Michitaka K, Nishiguchi S, Aoyagi Y, Hiasa Y, Tokumoto Y, Onji M, Japan Etiology of Liver Cirrhosis Study Group. Etiology of liver cirrhosis in Japan: a nationwide survey. *J Gastroenterol.* 2010; 45(1): 86-94.

Ministry of Finance (Costa Rica). Costa Rica Ministry of Health Budget 2014. San Jose, Costa Rica: Ministry of Finance (Costa Rica), 2013.

Ministry of Health and Welfare (Japan), Ministry of Health, Labour and Welfare (Japan). Japan National Nutrition Survey 2001 and 2002. as it appears in World Health Organization (WHO). WHO Global Database on Anemia, Nutrition Landscape Information System. Geneva, Switzerland: World Health Organization (WHO).

Ministry of Health and Welfare (Japan), National Institute of Health and Nutrition (Japan). Japan National Nutrition Survey 1999.

Ministry of Health and Welfare (Japan). Japan National Nutrition Survey 1980.

Ministry of Health and Welfare (Japan). Japan National Nutrition Survey 1981.

Ministry of Health and Welfare (Japan). Japan National Nutrition Survey 1982.

Ministry of Health and Welfare (Japan). Japan National Nutrition Survey 1983.

Ministry of Health and Welfare (Japan). Japan National Nutrition Survey 1984.

Ministry of Health and Welfare (Japan). Japan National Nutrition Survey 1985.

Ministry of Health and Welfare (Japan). Japan National Nutrition Survey 1986.

Ministry of Health and Welfare (Japan). Japan National Nutrition Survey 1987.

Ministry of Health and Welfare (Japan). Japan National Nutrition Survey 1988.

Ministry of Health and Welfare (Japan). Japan National Nutrition Survey 1989.

Ministry of Health and Welfare (Japan). Japan National Nutrition Survey 1990.

Ministry of Health and Welfare (Japan). Japan National Nutrition Survey 1991.

Ministry of Health and Welfare (Japan). Japan National Nutrition Survey 1992.

Ministry of Health and Welfare (Japan). Japan National Nutrition Survey 1992-1995. as it appears in World Health Organization (WHO). WHO Global Database on Anemia, Nutrition Landscape Information System. Geneva, Switzerland: World Health Organization (WHO).

Ministry of Health and Welfare (Japan). Japan National Nutrition Survey 1993.

Ministry of Health and Welfare (Japan). Japan National Nutrition Survey 1994.

Ministry of Health and Welfare (Japan). Japan National Nutrition Survey 1995.

Ministry of Health and Welfare (Japan). Japan National Nutrition Survey 1995. as it appears in Global Dietary Database Consortium, Nutrition and Chronic Disease Expert Group (NutriCoDE). Global Dietary Database 1980-2011. [Unpublished].

Ministry of Health and Welfare (Japan). Japan National Nutrition Survey 1996.

Ministry of Health and Welfare (Japan). Japan National Nutrition Survey 1997.

Ministry of Health and Welfare (Japan). Japan National Nutrition Survey 1998.

Ministry of Health and Welfare (Japan). Japan National Nutrition Survey 1998. as it appears in Global Dietary Database Consortium, Nutrition and Chronic Disease Expert Group (NutriCoDE). Global Dietary Database 1980-2011. [Unpublished].

Ministry of Health and Welfare (Japan). Japan National Nutrition Survey 2000.

Ministry of Health and Welfare (Japan). Japan National Nutrition Survey 2001.

Ministry of Health and Welfare (Japan). Japan National Survey on Smoking and Health 1999.

Ministry of Health, Labour and Welfare (Japan), National Institute of Health and Nutrition (Japan). Japan National Health and Nutrition Survey 2012.

Ministry of Health, Labour and Welfare (Japan). Japan Comprehensive Survey of Living Conditions 2010.

Ministry of Health, Labour and Welfare (Japan). Japan National Health and Nutrition Survey 2003.

Ministry of Health, Labour and Welfare (Japan). Japan National Health and Nutrition Survey 2004.

Ministry of Health, Labour and Welfare (Japan). Japan National Health and Nutrition Survey 2005.

Ministry of Health, Labour and Welfare (Japan). Japan National Health and Nutrition Survey 2006.

Ministry of Health, Labour and Welfare (Japan). Japan National Health and Nutrition Survey 2007.

Ministry of Health, Labour and Welfare (Japan). Japan National Health and Nutrition Survey 2008.

Ministry of Health, Labour and Welfare (Japan). Japan National Health and Nutrition Survey 2009.

Ministry of Health, Labour and Welfare (Japan). Japan National Health and Nutrition Survey 2010.

Ministry of Health, Labour and Welfare (Japan). Japan National Health and Nutrition Survey 2011.

Ministry of Health, Labour and Welfare (Japan). Japan National Health and Nutrition Survey 2013.

Ministry of Health, Labour and Welfare (Japan). Japan National Nutrition Survey 2002.

Ministry of Health, Labour and Welfare (Japan). Japan National Survey of Cardiovascular Diseases 2000.

Ministry of Health, Labour and Welfare (Japan). Japan Vital Registration - Deaths 1979.

Ministry of Health, Labour and Welfare (Japan). Japan Vital Registration - Deaths 1980.

Ministry of Health, Labour and Welfare (Japan). Japan Vital Registration - Deaths 1981.

Ministry of Health, Labour and Welfare (Japan). Japan Vital Registration - Deaths 1982.

Ministry of Health, Labour and Welfare (Japan). Japan Vital Registration - Deaths 1983.

Ministry of Health, Labour and Welfare (Japan). Japan Vital Registration - Deaths 1984.

Ministry of Health, Labour and Welfare (Japan). Japan Vital Registration - Deaths 1985.

Ministry of Health, Labour and Welfare (Japan). Japan Vital Registration - Deaths 1986.

Ministry of Health, Labour and Welfare (Japan). Japan Vital Registration - Deaths 1987.

Ministry of Health, Labour and Welfare (Japan). Japan Vital Registration - Deaths 1988.

Ministry of Health, Labour and Welfare (Japan). Japan Vital Registration - Deaths 1989.

Ministry of Health, Labour and Welfare (Japan). Japan Vital Registration - Deaths 1990.

Ministry of Health, Labour and Welfare (Japan). Japan Vital Registration - Deaths 1991.

Ministry of Health, Labour and Welfare (Japan). Japan Vital Registration - Deaths 1992.

Ministry of Health, Labour and Welfare (Japan). Japan Vital Registration - Deaths 1993.

Ministry of Health, Labour and Welfare (Japan). Japan Vital Registration - Deaths 1994.

Ministry of Health, Labour and Welfare (Japan). Japan Vital Registration - Deaths 1995.

Ministry of Health, Labour and Welfare (Japan). Japan Vital Registration - Deaths 1996.

Ministry of Health, Labour and Welfare (Japan). Japan Vital Registration - Deaths 1997.

Ministry of Health, Labour and Welfare (Japan). Japan Vital Registration - Deaths 1998.

Ministry of Health, Labour and Welfare (Japan). Japan Vital Registration - Deaths 1999.

Ministry of Health, Labour and Welfare (Japan). Japan Vital Registration - Deaths 2000.

Ministry of Health, Labour and Welfare (Japan). Japan Vital Registration - Deaths 2001.

Ministry of Health, Labour and Welfare (Japan). Japan Vital Registration - Deaths 2002.

Ministry of Health, Labour and Welfare (Japan). Japan Vital Registration - Deaths 2003.

Ministry of Health, Labour and Welfare (Japan). Japan Vital Registration - Deaths 2004.

Ministry of Health, Labour and Welfare (Japan). Japan Vital Registration - Deaths 2005.

Ministry of Health, Labour and Welfare (Japan). Japan Vital Registration - Deaths 2006.

Ministry of Health, Labour and Welfare (Japan). Japan Vital Registration - Deaths 2007.

Ministry of Health, Labour and Welfare (Japan). Japan Vital Registration - Deaths 2008.

Ministry of Health, Labour and Welfare (Japan). Japan Vital Registration - Deaths 2009.

Ministry of Health, Labour and Welfare (Japan). Japan Vital Registration - Deaths 2010.

Ministry of Health, Labour and Welfare (Japan). Japan Vital Registration - Deaths 2011.

Ministry of Health, Labour and Welfare (Japan). Japan Vital Registration - Deaths 2012.

Ministry of Health, Labour and Welfare (Japan). Japan Vital Registration - Deaths 2013.

Ministry of Health, Labour and Welfare (Japan). Japan Vital Registration - Live Births 2009.

Ministry of Health, Labour and Welfare (Japan). Japan Vital Registration - Live Births 2010.

Ministry of Health, Labour and Welfare (Japan). Japan Vital Registration - Live Births 2011.

Ministry of Health, Labour and Welfare (Japan). Japan Vital Registration - Live Births 2012.

Ministry of Health, Labour and Welfare (Japan). Japan Vital Registration - Live Births 2013.

Ministry of Health, Labour and Welfare (Japan). Japan Vital Registration - Live Births 2014.

Miura K, Okuda N, Turin TC, Takashima N, Nakagawa H, Nakamura K, Yoshita K, Okayama A, Ueshima H, NIPPON DATA80/90 Research Group. Dietary salt intake and blood pressure in a representative Japanese population: baseline analyses of NIPPON DATA80. *J Epidemiol.* 2010; 20 Suppl 3: S524–30.

Miyazaki H, Hanada N, Andoh MI, Yamashita Y, Saito T, Sogame A, Goto K, Shirahama R, Takehara T. Periodontal disease prevalence in different age groups in Japan as assessed according to the CPITN. *Community Dent Oral Epidemiol.* 1989; 17(2): 71–4.

Miyazaki H, Morimoto M. Changes in caries prevalence in Japan. *Eur J Oral Sci.* 1996; 104(4): 452–8.

Miyazaki H, Ohtani I, Abe N, Ansai T, Katoh Y, Sakao S, Takehara T, Shimada N, Pilot T. Periodontal conditions in older age cohorts aged 65 years and older in Japan, measured by CPITN and loss of attachment. *Community Dent Health.* 1995; 12(4): 216–20.

Miyazaki H, Shiraham R, Itoh-Andoh M, Yasmashita Y, Saito T, Sogame A, Takehara T. Prevalence and treatment needs of periodontal disease in employees of supermarkets in Japan. *Singapore Dent J.* 1988; 13(1): 10–3.

Morikawa M, Cho K, Yamada T, Yamada T, Sato S, Minakami H. Risk factors for eclampsia in Japan between 2005 and 2009. *Int J Gynaecol Obstet.* 2012; 117(1): 66–8.

Morikawa M, Yamada T, Yamada T, Cho K, Sato S, Minakami H. Seasonal variation in the prevalence of pregnancy-induced hypertension in Japanese women. *J Obstet Gynaecol Res.* 2014; 40(4): 926–31.

Morikawa Y, Nakagawa H, Naruse Y, Nishijo M, Miura K, Tabata M, Hirokawa W, Kagamimori S, Honda M, Yoshita K, Hayashi K. Trends in Stroke Incidence and Acute Case Fatality in a Japanese Rural Area: The Oyabe Study. *Stroke.* 2000; 31(7): 1583–7.

Morimoto K, Suzuki M, Ishifuji T, Yaegashi M, Asoh N, Hamashige N, Abe M, Aoshima M, Ariyoshi K, Adult Pneumonia Study Group-Japan (APSG-J). The burden and etiology of community-onset pneumonia in the aging Japanese population: a multicenter prospective study. *PLoS One.* 2015; 10(3): e0122247.

Morioka I, Morikawa S, Miwa A, Minami H, Yoshii K, Kugo M, Kitsuenezuka Y, Enomoto M, Jikimoto T, Nakamura M, Yokoyama N, Nishio H, Matsuo M, Yamada H. Culture-proven neonatal sepsis in Japanese neonatal care units in 2006–2008. *Neonatology.* 2012; 102(1): 75–80.

Morita N, Toki S, Hirohashi T, Minoda T, Ogawa K, Kono S, Tamakoshi A, Ohno Y, Sawada T, Muto T. Incidence and prevalence of inflammatory bowel disease in Japan: nationwide epidemiological survey during the year 1991. *J Gastroenterol.* 1995; 1–4.

Moriwaka F, Tashiro K, Itoh K, Honma S, Okumura H, Kikuchi S, Hamada T, Kaneko S, Kurokawa Y. Prevalence of Parkinson's Disease in Hokkaido, the Northernmost Island of Japan. *Intern Med.* 1996; 35(4): 276–9.

Mukai N, Doi Y, Ninomiya T, Hata J, Hirakawa Y, Fukuhara M, Iwase M, Kiyohara Y. Cut-off values of fasting and post-load plasma glucose and HbA1c for predicting Type 2 diabetes in community-dwelling Japanese subjects: the Hisayama Study. *Diabet Med.* 2012; 29(1): 99–106.

Mukai N, Doi Y, Ninomiya T, Hirakawa Y, Nagata M, Yoshida D, Hata J, Fukuhara M, Nakamura U, Kitazono T, Kiyohara Y. Trends in the prevalence of type 2 diabetes and prediabetes in community-dwelling Japanese subjects: The Hisayama Study. *J Diabetes Investig.* 2014; 5(2): 162–9.

Muraki S, Oka H, Akune T, Mabuchi A, En-yo Y, Yoshida M, Saika A, Suzuki T, Yoshida H, Ishibashi H, Yamamoto S, Nakamura K, Kawaguchi H, Yoshimura N. Prevalence of radiographic knee osteoarthritis and its association with knee pain in the elderly of Japanese population-based cohorts: the ROAD study. *Osteoarthritis Cartil.* 2009; 17(9): 1137–43.

Nagaoki Y, Hyogo H, Aikata H, Tanaka M, Naeshiro N, Nakahara T, Honda Y, Miyaki D, Kawaoka T, Takaki S, Hiramatsu A, Waki K, Imamura M, Kawakami Y, Takahashi S, Chayama K. Recent trend of clinical features in patients with hepatocellular carcinoma. *Hepatology Res.* 2012; 42(4): 368–75.

Nagata M, Ninomiya T, Doi Y, Yonemoto K, Kubo M, Hata J, Tsuruya K, Iida M, Kiyohara Y. Trends in the prevalence of chronic kidney disease and its risk factors in a general Japanese population: the Hisayama Study. *Nephrol Dial Transplant.* 2010; 25(8): 2557–64.

Naito S, Tanaka J, Nagashima K, Chang B, Hishiki H, Takahashi Y, Oikawa J, Nagasawa K, Shimojo N, Ishiwada N. The impact of heptavalent pneumococcal conjugate vaccine on the incidence of childhood community-acquired pneumonia and bacteriologically confirmed pneumococcal pneumonia in Japan. *Epidemiol Infect.* 2016; 144(3): 494–506.

Nakagami T, Qiao Q, Carstensen B, Nhr-Hansen C, Hu G, Tuomilehto J, Balkau B, Borch-Johnsen K. Age, body mass index and Type 2 diabetes-associations modified by ethnicity. *Diabetologia.* 2003; 46(8): 1063–70.

Nakagami T, Tominaga M, Nishimura R, Yoshiike N, Daimon M, Ozumi T, Tajima N. Is the measurement of glycated hemoglobin A1c alone an efficient screening test for undiagnosed diabetes? Japan National Diabetes Survey. *Diabetes Res Clin Pract.* 2007; 76(2): 251–6.

Nakai S, Hanafusa N, Masakane I, Taniguchi M, Hamano T, Shoji T, Hasegawa T, Itami N, Yamagata K, Shinoda T, Kazama JJ, Watanabe Y, Shigematsu T, Marubayashi S, Morita O, Wada A, Hashimoto S, Suzuki K, Nakamoto H, Kimata N, Wakai K, Fujii N, Ogata S, Tsuchida K, Nishi H, Iseki K, Tsubakihara Y. An overview of regular dialysis treatment in Japan (as of 31 December 2012). *Ther Apher Dial.* 2014; 18(6): 535–602.

Nakai S, Iseki K, Itami N, Ogata S, Kazama JJ, Kimata N, Shigematsu T, Shinoda T, Shoji T, Suzuki K, Taniguchi M, Tsuchida K, Nakamoto H, Nishi H, Hashimoto S, Hasegawa T, Hanafusa N, Hamano T, Fujii N, Masakane I, Marubayashi S, Morita O, Yamagata K, Wakai K, Wada A, Watanabe Y, Tsubakihara Y. An overview of regular dialysis treatment in Japan (as of 31 December 2010). *Ther Apher Dial.* 2012; 16(6): 483–521.

Nakai S, Iseki K, Itami N, Ogata S, Kazama JJ, Kimata N, Shigematsu T, Shinoda T, Shoji T, Suzuki K, Taniguchi M, Tsuchida K, Nakamoto H, Nishi H, Hashimoto S, Hasegawa T, Hanafusa N, Hamano T, Fujii N, Masakane I, Marubayashi S, Morita O, Yamagata K, Wakai K, Wada A, Watanabe Y, Tsubakihara Y. Overview of regular dialysis treatment in Japan (as of 31 December 2009). *Ther Apher Dial.* 2012; 16(1): 11–53.

Nakai S, Masakane I, Akiba T, Iseki K, Watanabe Y, Itami N, Kimata N, Shigematsu T, Shinoda T, Syoji T, Syoji T, Suzuki K, Tsuchida K, Nakamoto H, Hamano T, Marubayashi S, Morita O, Morozumi K, Yamagata K, Yamashita A, Wakai K, Wada A, Tsubakihara Y. Overview of regular dialysis treatment in

- Japan (as of 31 December 2005). *Ther Apher Dial.* 2007; 11(6): 411–41.
- Nakai S, Masakane I, Akiba T, Shigematsu T, Yamagata K, Watanabe Y, Iseki K, Itami N, Shinoda T, Morozumi K, Shoji T, Marubayashi S, Morita O, Kimata N, Shoji T, Suzuki K, Tsuchida K, Nakamoto H, Hamano T, Yamashita A, Wakai K, Wada A, Tsubakihara Y. Overview of regular dialysis treatment in Japan as of 31 December 2006. *Ther Apher Dial.* 2008; 12(6): 428–56.
- Nakai S, Masakane I, Shigematsu T, Hamano T, Yamagata K, Watanabe Y, Itami N, Ogata S, Kimata N, Shinoda T, Syouji T, Suzuki K, Taniguchi M, Tsuchida K, Nakamoto H, Nishi S, Nishi H, Hashimoto S, Hasegawa T, Hanafusa N, Fujii N, Marubayashi S, Morita O, Wakai K, Wada A, Iseki K, Tsubakihara Y. An overview of regular dialysis treatment in Japan (as of 31 December 2007). *Ther Apher Dial.* 2009; 13(6): 457–504.
- Nakai S, Shinzato T, Nagura Y, Masakane I, Kitaoka T, Shinoda T, Yamazaki C, Sakai R, Ohmori H, Morita O, Iseki K, Kikuchi K, Kubo K, Suzuki K, Tabei K, Fushimi K, Miwa N, Wada A, Yanai M, Akiba T, Patient Registration Committee, Japanese Society for Dialysis Therapy, Tokyo. An overview of regular dialysis treatment in Japan (as of 31 December 2001). *Ther Apher Dial.* 2004; 8(1): 3–32.
- Nakai S, Suzuki K, Masakane I, Wada A, Itami N, Ogata S, Kimata N, Shigematsu T, Shinoda T, Syouji T, Taniguchi M, Tsuchida K, Nakamoto H, Nishi S, Nishi H, Hashimoto S, Hasegawa T, Hanafusa N, Hamano T, Fujii N, Marubayashi S, Morita O, Yamagata K, Wakai K, Watanabe Y, Iseki K, Tsubakihara Y. Overview of regular dialysis treatment in Japan (as of 31 December 2008). *Ther Apher Dial.* 2010; 14(6): 505–40.
- Nakai S, Wada A, Kitaoka T, Shinzato T, Nagura Y, Kikuchi K, Masakane I, Shinoda T, Yamazaki C, Sakai R, Marubayashi S, Morita O, Iseki K, Usami T, Kimata N, Suzuki K, Tabei K, Fushimi K, Miwa N, Yauchi M, Wakai K, Akiba T. An overview of regular dialysis treatment in Japan (as of 31 December 2004). *Ther Apher Dial.* 2006; 10(6): 476–97.
- Nakai S, Watanabe Y, Masakane I, Wada A, Shoji T, Hasegawa T, Nakamoto H, Yamagata K, Kazama JJ, Fujii N, Itami N, Shinoda T, Shigematsu T, Marubayashi S, Morita O, Hashimoto S, Suzuki K, Kimata N, Hanafusa N, Wakai K, Hamano T, Ogata S, Tsuchida K, Taniguchi M, Nishi H, Iseki K, Tsubakihara Y. Overview of regular dialysis treatment in Japan (as of 31 December 2011). *Ther Apher Dial.* 2013; 17(6): 567–611.
- Nakajima H, Nakagomi T, Kamisawa T, Sakaki N, Muramoto K, Mikami T, Nara H, Nakagomi O. Winter seasonality and rotavirus diarrhoea in adults. *Lancet.* 2001; 357(9272): 1950.
- Nakajima S, Nishiyama Y, Yamaoka M, Yasuoka T, Cho E. Changes in the prevalence of *Helicobacter pylori* infection and gastrointestinal diseases in the past 17 years. *J Gastroenterol Hepatol.* 2010; S99–110.
- Nakamura K, Tsugawa N, Saito T, Ishikawa M, Tsuchiya Y, Hyodo K, Maruyama K, Oshiki R, Kobayashi R, Nashimoto M, Yoshihara A, Ozaki R, Okano T, Yamamoto M. Vitamin D status, bone mass, and bone metabolism in home-dwelling postmenopausal Japanese women: Yokogoshi Study. *Bone.* 2008; 42(2): 271–7.
- Nakamura Y, Ojima T, Oki I, Tanihara S, Yanagawa H. Estimation of the future numbers of patients with mental disorders in Japan based on the results of National Patient Surveys. *J Epidemiol.* 1997; 7(4): 214–20.
- Nakamura Y, Tomidokoro A, Sawaguchi S, Sakai H, Iwase A, Araie M. Prevalence and causes of low vision and blindness in a rural Southwest Island of Japan: the Kumejima study. *Ophthalmology.* 2010; 117(12): 2315–21.
- Nakano T, Sei M, Ewis AA, Munakata H, Onishi C, Nakahori Y. Tracking overweight and obesity in Japanese children; a six years longitudinal study. *J Med Invest.* 2010; 57(1–2): 114–23.
- Nakao M, Yano E. Somatic symptoms for predicting depression: one-year follow-up study in annual health examinations. *Psychiatry Clin Neurosci.* 2006; 60(2): 219–25.
- Nakaoka D, Sugimoto T, Kaji H, Kanzawa M, Yano S, Yamauchi M, Sugishita T, Chihara K. Determinants of bone mineral density and spinal fracture risk in postmenopausal Japanese women. *Osteoporos Int.* 2001; 12(7): 548–54.
- Nakashima K, Kashiwagi S, Hayashi J, Noguchi A, Hirata M, Kajiyama W, Urabe K, Minami K, Maeda Y. Sexual transmission of hepatitis C virus among female prostitutes and patients with sexually transmitted diseases in Fukuoka, Kyushu, Japan. *Am J Epidemiol.* 1992; 136(9): 1132–7.
- Nakashima K, Yokoyama, Yoshitaka, Shimoyama, Ryoji, Saito, Hiroshi, Kuno, Nobutoshi, Sano, Kazuhiko, Rin, Yongshang, Adachi, Yoshiki, Urakami, Katsuya, Oshima, Takashi, Takeshita, Kenzo, Takahashi, Kazuro. Prevalence of Neurological Disorders in a Japanese Town. *Neuroepidemiology.* 1996; 15(4): 208–13.
- Nakatsuji T, Miwa S. Incidence and characteristics of glucose-6-phosphate dehydrogenase variants in Japan. *Hum Genet.* 1979; 51(3): 297–305.
- Nakayama T, Yokoyama T, Yoshiike N, Zaman MM, Date C, Tanaka H, Detels R. Population Attributable Fraction of Stroke Incidence in Middle-Aged and Elderly People: Contributions of Hypertension, Smoking and Atrial Fibrillation. *Neuroepidemiology.* 2000; 19(4): 217–26.
- National Hospital Organization (Japan). Japan National Survey on Underage Smoking and Drinking 1996.
- National Hospital Organization (Japan). Japan National Survey on Underage Smoking and Drinking 2001.
- National Hospital Organization (Japan). Japan National Survey on Underage Smoking and Drinking 2004.
- National Institute of Infectious Diseases (Japan). Japan Provisional Cases of Notifiable Diseases by Prefecture, 52nd Week 2012. Tokyo, Japan: National Institute of Infectious Diseases (Japan), 2013.
- National Institute of Infectious Diseases (Japan). Japan Provisional Cases of Notifiable Diseases by Prefecture, 52nd Week 2014. Tokyo, Japan: National Institute of Infectious Diseases (Japan), 2015.
- National Institute of Infectious Diseases (Japan). Syphilis in Japan as of 2001. *Infect Agents Surveill Rep.* 2002; 23 (4, 266): 85–86.
- National Institute of Population and Social Security Research (Japan), Ochanomizu University, Toyo Eiwa University, University of Michigan School of Social Work, University of Tokyo, World Health Organization (WHO). Japan WHO Multi-country Study on Women's Health and Domestic Violence Against Women 2000–2001.
- Natural Earth, North American Cartographic Information Society (NACIS), Washington Post. Natural Earth Vector and Raster Map Data. Milwaukee, United States: Natural Earth.
- Niizeki T, Takeishi Y, Takabatake N, Shibata Y, Konta T, Kato T, Kawata S, Kubota I. Circulating levels of heart-type fatty acid-binding protein in a general Japanese population: effects of age, gender, and physiologic characteristics. *Circ J.* 2007; 71(9): 1452–7.
- Niizeki K, Kano O, Kondo Y. An epidemic study of molluscum contagiosum. Relationship to swimming. *Dermatologica.* 1984; 169(4): 197–8.
- Nishimura A, Hasegawa M, Kato K, Yamada T, Uchida A, Sudo A. Risk factors for the incidence and progression of radiographic osteoarthritis of the knee among Japanese. *Int Orthop.* 2011; 35(6): 839–43.
- Nishimura A, Hasegawa M, Wakabayashi H, Yoshida K, Kato K, Yamada T, Uchida A, Sudo A. Prevalence and characteristics of unilateral knee osteoarthritis in a community sample of elderly Japanese: do fractures around the knee affect the pathogenesis of unilateral knee osteoarthritis?. *J Orthop Sci.* 2012; 17(5): 556–61.
- Nishimura K, Oga T, Tsukino M, Hajiuro T, Ikeda A, Jones PW. Reanalysis of the Japanese experience using the combined COPD assessment of the 2011 GOLD classification. *Respir Investig.* 2014; 52(2): 129–35.
- Nishioka K, Mikanagi K. Hereditary and environmental factors influencing on the serum uric acid throughout ten years population study in Japan. *Adv Exp Med Biol.* 1980; 122A: 155–9.
- Nishioka K. Hepatitis C virus infection in Japan. *Gastroenterol Jpn.* 1991; 152–5.
- Nishizawa S, Inubushi M, Kido A, Miyagawa M, Inoue T, Shinohara K, Kajihara M. Incidence and characteristics of uterine leiomyomas with FDG uptake. *Ann Nucl Med.* 2008; 22(9): 803–10.
- Niwa Y, Yatsuya H, Tamakoshi K, Nishio K, Kondo T, Lin Y, Suzuki S, Wakai K, Tokudome S, Yamamoto A, Hamajima N, Toyoshima H, Tamakoshi A, JACC Study Group. Relationship between body mass index and the risk of ovarian cancer in the Japanese population: findings from the Japanese Collaborate Cohort (JACC) study. *J Obstet Gynaecol Res.* 2005; 31(5): 452–8.
- Noborisaka Y, Ishizaki M, Yamada Y, Honda R, Yokoyama H, Miyao M, Tabata M. Distribution of and factors contributing to chronic kidney disease in a middle-aged working population. *Environ Health Prev Med.* 2013; 18(6): 466–76.
- Noguchi A, Hayashi J, Nakashima K, Ikematsu H, Hirata M, Kashiwagi S. Decrease of hepatitis A and B virus infections in the population of Okinawa, Japan. *J Infect.* 1991; 23(3): 255–62.
- Ochi S, Onji M, Shiraiishi K, Ohtu K, Akao T, Yano Y, Takei N, Matsui H, Ohta Y, Umeda M. Prevalence of hepatitis C virus antibody in an area endemic for hepatitis B virus and human T cell leukaemia virus. *J Gastroenterol Hepatol.* 1991; 6(6): 599–602.
- Ogura C, Nakamoto H, Uema T, Yamamoto K, Yonemori T, Yoshimura T. Prevalence of senile dementia in Okinawa, Japan. COSEPO Group. Study Group of

- Epidemiology for Psychiatry in Okinawa. *Int J Epidemiol.* 1995; 24(2): 373-80.
- Ohara K, Suzuki Y, Sugita T, Kobayashi K, Tamefusa K, Hattori S, Ohara K. Mortality among alcoholics discharged from a Japanese hospital. *Br J Addict.* 1989; 84(3): 287-91.
- Ohfuji S, Miyake Y, Arakawa M, Tanaka K, Sasaki S. Sibship size and prevalence of allergic disorders in Japan: the Ryukyus Child Health Study. *Pediatr Allergy Immunol.* 2009; 20(4): 377-84.
- Ohkura T, Taniguchi S-I, Osaki Y, Yamamoto N, Sumi K, Fujioka Y, Matsuzawa K, Izawa S, Shiochi H, Kinoshita H, Inoue K, Takechi M, Kishimoto T, Shigemasa C. Lower fasting plasma glucose criteria and high triglycerides are effective for screening diabetes mellitus in the rural Japanese population: the Tottori-Kofu Study. *Rural Remote Health.* 2011; 11(3): 1697.
- Ohmori S, Kiyohara Y, Kato I, Ohmura T, Iwamoto H, Nakayama K, Nomiyama K, Yoshitake T, Ueda K, Fujishima M. Hyperinsulinaemia and blood pressure in a general Japanese population: the Hisayama Study. *J Hypertens.* 1994; 12(10): 1191-7.
- Ohmura T, Ueda K, Kiyohara Y, Kato I, Iwamoto H, Nakayama K, Nomiyama K, Ohmori S, Yoshitake T, Shinkawa A. Prevalence of type 2 (non-insulin-dependent) diabetes mellitus and impaired glucose tolerance in the Japanese general population: the Hisayama Study. *Diabetologia.* 1993; 36(11): 1198-203.
- Ohswa M, Itai K, Tanno K, Onoda T, Ogawa A, Nakamura M, Kuribayashi T, Yoshida Y, Kawamura K, Sasaki S, Sakata K, Okayama A. Cardiovascular risk factors in the Japanese northeastern rural population. *Int J Cardiol.* 2009; 137(3): 226-35.
- Ohswa M, Okayama A, Okamura T, Itai K, Nakamura M, Tanno K, Kato K, Yaegashi Y, Onoda T, Sakata K, Ueshima H. Mortality risk attributable to atrial fibrillation in middle-aged and elderly people in the Japanese general population: nineteen-year follow-up in NIPPON DATA80. *Circ J.* 2007; 71(6): 814-9.
- Ohta Y, Nakane Y, Nishihara J, Takemoto T. Ecological structure and incidence rates of schizophrenia in Nagasaki City. *Acta Psychiatr Scand.* 1992; 86(2): 113-20.
- Oka E, Ohtsuka Y, Yoshinaga H, Murakami N, Kobayashi K, Ogino T. Prevalence of childhood epilepsy and distribution of epileptic syndromes: a population-based survey in Okayama, Japan. *Epilepsia.* 2006; 47(3): 626-30.
- Okada H, Horibe H, Yoshiyuki O, Hayakawa N, Aoki N. A prospective study of cerebrovascular disease in Japanese rural communities, Akabane and Asahi. Part 1: evaluation of risk factors in the occurrence of cerebral hemorrhage and thrombosis. *Stroke.* 1976; 7(6): 599-607.
- Okada K, Furusyo N, Sawayama Y, Kanamoto Y, Murata M, Hayashi J. Prevalence and risk factors for diabetes: a ten year follow-up study of the Yaeyama district of Okinawa. *Hukuoka Acta Med.* 2010; 101(10): 215-24.
- Okada K, Hayashi T, Tsumura K, Suematsu C, Endo G, Fujii S. Leisure-time physical activity at weekends and the risk of Type 2 diabetes mellitus in Japanese men: the Osaka Health Survey. *Diabet Med.* 2000; 17(1): 53-8.
- Okada K, Kobayashi S, Tsunematsu T. Prevalence of Parkinson's disease in Izumo City, Japan. *Gerontology.* 1990; 36(5-6): 340-4.
- Okamoto H, Yoneyama T, Lindhe J, Haffajee A, Socransky S. Methods of evaluating periodontal disease data in epidemiological research. *J Clin Periodontol.* 1988; 15(7): 430-9.
- Okuma T, Kumashiro H. Natural history and prognosis of epilepsy: report of a multi-institutional study in Japan. The group for the study of prognosis of epilepsy in Japan. *Epilepsia.* 1981; 22(1): 35-53.
- Ono R, Higashi T, Takahashi O, Tokuda Y, Shimbo T, Endo H, Hinohara S, Fukui T, Fukuhara S. Sex differences in the change in health-related quality of life associated with low back pain. *Qual Life Res.* 2012; 21(10): 1705-11.
- Ono R, Yamazaki S, Takegami M, Otani K, Sekiguchi M, Onishi Y, Hayashino Y, Kikuchi S, Konno S, Fukuhara S. Gender difference in association between low back pain and metabolic syndrome: locomotive syndrome and health outcome in Aizu cohort study (LOHAS). *Spine.* 2012; 37(13): 1130-7.
- Osaki Y, Morita Y, Kuwahara T, Miyano I, Doi Y. Prevalence of Parkinson's disease and atypical parkinsonian syndromes in a rural Japanese district. *Acta Neurol Scand.* 2011; 124(3): 182-7.
- Otani T, Iwasaki M, Inoue M, Shoichiro Tsugane for the Japan Public Health Center-based Prospective Study Group. Body mass index, body height, and subsequent risk of colorectal cancer in middle-aged and elderly Japanese men and women: Japan public health center-based prospective study. *Cancer Causes Control.* 2005; 16(7): 839-50.
- Ozyilkcan E, Ozyilkcan O, Firat D, Telatar H. Hepatitis C virus antibody in patients with primary liver cancer (hepatocellular carcinoma, cholangiocarcinoma, and combined hepatocellular-cholangiocarcinoma) in Japan. *Cancer.* 1994; 73(7): 2002-3.
- Parkin DM, International Agency for Research on Cancer, International Association of Cancer Registries. *Cancer Incidence in Five Continents. Vol. I to VIII.* Lyon, France, IARC Press, 2005.
- Patient Registration Committee, Japanese Society for Dialysis Therapy, Tokyo, Japan. An overview of regular dialysis treatment in Japan as of 31 December 2003. *Ther Apher Dial.* 2005; 9(6): 431-58.
- Patient Registration Committee, Japanese Society for Dialysis Therapy. An overview of regular dialysis treatment in Japan (as of 31 December 2002). *Ther Apher Dial.* 2004; 8(5): 358-82.
- Pregnant Pause. Summary of Abortion Laws Around the World. Monroe, United States: Pregnant Pause.
- Research Group on Progressive Chronic Renal Disease. Nationwide and long-term survey of primary glomerulonephritis in Japan as observed in 1,850 biopsied cases. Research Group on Progressive Chronic Renal Disease. *Nephron.* 1999; 82(3): 205-13.
- Sado M, Inagaki A, Koreki A, Knapp M, Kissane LA, Mimura M, Yoshimura K. The cost of schizophrenia in Japan. *Neuropsychiatr Dis Treat.* 2013; 787.
- Saeki H, Oiso N, Honma M, Odajima H, Iizuka H, Kawada A, Tamaki K. Comparison of prevalence of atopic dermatitis in Japanese elementary schoolchildren between 2001/2002 and 2007/2008. *J Dermatol.* 2009; 36(9): 512-4.
- Sakai F, Igarashi H. Prevalence of migraine in Japan: a nationwide survey. *Cephalalgia.* 1997; 17(1): 15-22.
- Sakai R. Relationship between prevalence of childhood obesity in 17-year-olds and socioeconomic and environmental factors: prefecture-level analysis in Japan. *Asia Pac J Public Health.* 2013; 25(2): 159-69.
- Sakamoto N, Yang L. BMI centile curves for Japanese children aged 5-17 years in 2000-2005. *Public Health Nutr.* 2009; 12(10): 1688-92.
- Sakata H, Maruyama S. A study of bacterial meningitis in Hokkaido between 1994 and 1998. *J Jpn Assoc Infec Dis.* 2000; 74(4): 339-44.
- Saku M, Tokudome S, Ikeda M, Kono S, Makimoto K, Uchimura H, Mukai A, Yoshimura T. Mortality in psychiatric patients, with a specific focus on cancer mortality associated with schizophrenia. *Int J Epidemiol.* 1995; 24(2): 366-72.
- Sakugawa H, Nakasone H, Nakayoshi T, Kawakami Y, Yamashiro T, Maeshiro T, Kobashigawa K, Kinjo F, Saito A. Clinical characteristics of patients with cryptogenic liver cirrhosis in Okinawa, Japan. *Hepatogastroenterology.* 2003; 50(54): 2005-8.
- Sanada T, Fujimoto K, Miyano K, Doi M, Tokonami S, Uesugi M, Takata Y. Measurement of nationwide indoor Rn concentration in Japan. *J Environ Radioact.* 1999; 45(2): 129-37.
- Sanmartin J, Molina A, Garcia Y, Queen Sofia Center for the Study of Violence. Partner Violence against Women: Statistics and Legislation, International Report 2003. Valencia, Spain: Queen Sofia Center for the Study of Violence, 2003.
- Sanmartin J, Queen Sofia Center for the Study of Violence. Partner Violence against Women: Statistics and Legislation, 2nd International Report 2007. Valencia, Spain: Queen Sofia Center for the Study of Violence, 2007.
- Sartorius N, Jablensky A, Korten A, Ernberg G, Anker M, Cooper JE, Day R. Early manifestations and first-contact incidence of schizophrenia in different cultures: a preliminary report on the initial evaluation phase of the WHO Collaborative Study on determinants of outcome of severe mental disorders. *Psychol Med.* 1986; 16(04): 909-28.
- Sasaki S, Ishihara J, Tsugane S. Validity of a self-administered food frequency questionnaire in the 5-year follow-up survey of the JPHC Study Cohort I to assess sodium and potassium intake: comparison with dietary records and 24-hour urinary excretion level. *J Epidemiol.* 2003; 13(1 Supp): S102-S105. as it appears in Global Dietary Database Consortium, Nutrition and Chronic Disease Expert Group (NutriCoDE). Global Dietary Database 1980-2011. [Unpublished].
- Sata M, Nakano H, Suzuki H, Noguchi S, Yamakawa Y, Tanaka E, Fukuzumi K, Tanaka K, Yoshida H, Tanikawa K. Sero-epidemiologic study of hepatitis C virus infection in Fukuoka, Japan. *J Gastroenterol.* 1998; 33(2): 218-22.
- Satoh H, Fujii S, Furumoto T, Kishi R, Tsutsui H. Waist circumference can predict the occurrence of multiple metabolic risk factors in middle-aged Japanese subjects. *Ind Health.* 2010; 48(4): 447-51.
- Satoh H, Kishi R, Tsutsui H. Metabolic syndrome is a significant and independent risk factor for increased arterial stiffness in Japanese subjects. *Hypertens Res.* 2009; 32(12): 1067-71.

- Schrag A, Ben-Shlomo Y, Quinn NP. Cross sectional prevalence survey of idiopathic Parkinson's disease and parkinsonism in London. *BMJ*. 2000; 321(7252): 21-2.
- Sekikawa A, Eguchi H, Tominaga M, Igarashi K, Abe T, Manaka H, Sasaki H, Fukuyama H, Kato T, Kiyohara Y, Fujishima M. Prevalence of type 2 diabetes mellitus and impaired glucose tolerance in a rural area of Japan. The Funagata diabetes study. *J Diabet Complications*. 2000; 14(2): 78-83.
- Sekikawa A, Tominaga M, Takahashi K, Eguchi H, Igarashi M, Ohnuma H, Sugiyama K, Manaka H, Sasaki H, Fukuyama H. Prevalence of diabetes and impaired glucose tolerance in Funagata area, Japan. *Diabetes Care*. 1993; 16(4): 570-4.
- Sekita A, Arima H, Ninomiya T, Ohara T, Doi Y, Hirakawa Y, Fukuhara M, Hata J, Yonemoto K, Ga Y, Kitazono T, Kanba S, Kiyohara Y. Elevated depressive symptoms in metabolic syndrome in a general population of Japanese men: a cross-sectional study. *BMC Public Health*. 2013; 13: 862.
- Sekita A, Ninomiya T, Tanizaki Y, Doi Y, Hata J, Yonemoto K, Arima H, Sasaki K, Iida M, Iwaki T, Kanba S, Kiyohara Y. Trends in prevalence of Alzheimer's disease and vascular dementia in a Japanese community: the Hisayama Study. *Acta Psychiatr Scand*. 2010; 122(4): 319-25.
- Shiba M, Shimogaito J, Kose A, Fujiuchi S, Nishiyama H, Yoshimasu F, Asai T, Rocca WA. Prevalence of dementia in the rural village of Hanazono-mura, Japan. *Neuroepidemiology*. 1999; 18(1): 32-6.
- Shiba N, Shimokawa H. Chronic heart failure in Japan: Implications of the CHART studies. *Vasc Health Risk Manag*. 2008; 4(1): 103-13.
- Shiba N, Watanabe J, Shinozaki T, Koseki Y, Sakuma M, Kagaya Y, Shirato K, CHART Investigators. Analysis of chronic heart failure registry in the Tohoku district: third year follow-up. *Circ J*. 2004; 68(5): 427-34.
- Shibata S. Hemoglobinopathies in Japan. *Hemoglobin*. 1981; 5(5): 509-15.
- Shichikawa K, Inoue K, Hirota S, Maeda A, Ota H, Kimura M, Ushiyama T, Tsujimoto M. Changes in the incidence and prevalence of rheumatoid arthritis in Kamitonda, Wakayama, Japan, 1965-1996. *Ann Rheum Dis*. 1999; 58(12): 751-6.
- Shimamoto T, Yamamichi N, Kodashima S, Takahashi Y, Fujishiro M, Oka M, Mitsushima T, Koike K. No association of coffee consumption with gastric ulcer, duodenal ulcer, reflux esophagitis, and non-erosive reflux disease: a cross-sectional study of 8,013 healthy subjects in Japan. *PLoS One*. 2013; 8(6): e65996.
- Shimatani T, Inoue M, Iwamoto K, Hyogo H, Yokozaki M, Saeki T, Tazuma S, Horikawa Y. Prevalence of Helicobacter pylori infection, endoscopic gastric findings and dyspeptic symptoms among a young Japanese population born in the 1970s. *J Gastroenterol Hepatol*. 2005; 20(9): 1352-7.
- Shimizu Y, Nakazato M, Sekita T, Kadota K, Yamasaki H, Takamura N, Aoyagi K, Kusano Y, Maeda T. Association between alkaline phosphatase and hypertension in a rural Japanese population: the Nagasaki Islands study. *J Physiol Anthropol*. 2013; 32(1): 10.
- Shimoyama T, Aoki M, Sasaki Y, Matsuzaka M, Nakaji S, Fukuda S. ABC screening for gastric cancer is not applicable in a Japanese population with high prevalence of atrophic gastritis. *Gastric Cancer*. 2012; 15(3): 331-4.
- Shinoh M, Iwata S, Sato Y, Akita H, Sunakawa K. Childhood bacterial meningitis trends in Japan from 2009 to 2010. *J Jpn Assoc Infect Dis*. 2012; 86(5): 582-91.
- Shiotsuki Y, Matsuishi T, Yoshimura K, Yamashita F, Yano K, Tokimasa H, Shoji H. The prevalence of mental retardation (MR) in Kurume City. *Brain Dev*. 1984; 6(5): 487-90.
- Shiozaki A, Matsuda Y, Hayashi K, Satoh S, Saito S. Comparison of risk factors for major obstetric complications between Western countries and Japan: a case-cohort study. *J Obstet Gynaecol Res*. 2011; 37(10): 1447-54.
- Shiozaki H, Koga Y, Omori G, Yamamoto G, Takahashi HE. Epidemiology of osteoarthritis of the knee in a rural Japanese population. *Knee*. 1999; 6(3): 183-8.
- Siciliani L, Hurst J. Explaining Waiting-Time Variations for Elective Surgery Across OECD Countries. *OECD Econ Stud*. 2004; 38(1): 95-123.
- Sloan N, Durocher J, Aldrich T, Blum J, Winikoff B. What measured blood loss tells us about postpartum bleeding: a systematic review. *BJOG*. 2010; 117(7): 788-800.
- Stamler J, Elliott P, Chan Q. INTERMAP Appendix Tables. *J Hum Hypertens*. 2003; 17: 665-775. as it appears in Global Dietary Database Consortium, Nutrition and Chronic Disease Expert Group (NutriCoDE). Global Dietary Database 1980-2011. [Unpublished].
- Statistics Bureau (Japan). Japan Population and Housing Census 1980 and 1985.
- Statistics Bureau (Japan). Japan Population and Housing Census 1985.
- Statistics Bureau (Japan). Japan Population and Housing Census 1995 and 2000.
- Statistics Bureau (Japan). Japan Population and Housing Census 1995.
- Statistics Bureau (Japan). Japan Population and Housing Census 2005 and 2010.
- Statistics Bureau (Japan). Japan Population and Housing Census 2010.
- Statistics Bureau (Japan). Japan Population Census 1960.
- Statistics Bureau (Japan). Japan Population Census 1970.
- Statistics Bureau (Japan). Japan Population Census 1975 and 1980.
- Statistics Bureau (Japan). Japan Population Census 1980.
- Statistics Bureau (Japan). Japan Population Census 2000 and 2005.
- Statistics Bureau (Japan). Japan Population Census 2000.
- Statistics Bureau (Japan). Japan Population Census 2005.
- Statistics Bureau (Japan). Japan Statistical Yearbook 2015. Tokyo, Japan: Statistics Bureau (Japan).
- Sudo A, Miyamoto N, Horikawa K, Urawa M, Yamakawa T, Yamada T, Uchida A. Prevalence and risk factors for knee osteoarthritis in elderly Japanese men and women. *J Orthop Sci*. 2008; 13(5): 413-8.
- Sugiyama T, Abe T. The prevalence of autism in Nagoya, Japan: a total population study. *J Autism Dev Disord*. 1989; 19(1): 87D96.
- Suka M, Yoshida K, Yamauchi K. Impact of body mass index on cholesterol levels of Japanese adults. *Int J Clin Pract*. 2006; 60(7): 770-82.
- Suzuki G, Yamaguchi I, Ogata H, Sugiyama H, Yonehara H, Kasagi F, Fujiwara S, Tatsukawa Y, Mori I, Kimura S. A nation-wide survey on indoor radon from 2007 to 2010 in Japan. *J Radiat Res*. 2010; 51(6): 683-9.
- Suzuki H. Viral Hepatitis in Japan. In: Nishioka K, Suzuki H, Mishiro S, Oda T, eds. *Viral Hepatitis and Liver Disease. Proceedings of the International Symposium on Viral Hepatitis and Liver Disease: Molecules Today, More Cures Tomorrow*; 1993 May 10-14; Tokyo, Japan. Springer Japan; 1994. 426-8.
- Suzuki R, Iwasaki M, Yamamoto S, Inoue M, Sasazuki S, Sawada N, Yamaji T, Shimazu T, Tsugane S. Japan Public Health Center-based Prospective Study Group. Leisure-time physical activity and breast cancer risk defined by estrogen and progesterone receptor status--the Japan Public Health Center-based Prospective Study. *Prev Med*. 2011; 52(3-4): 227-33.
- Suzuki S, Kojima M, Tokudome S, Mori M, Sakauchi F, Fujino Y, Wakai K, Lin Y, Kikuchi S, Tamakoshi K, Yatsuya H, Tamakoshi A, Japan Collaborative Cohort Study Group. Effect of physical activity on breast cancer risk: findings of the Japan collaborative cohort study. *Cancer Epidemiol Biomarkers Prev*. 2008; 17(12): 3396-401.
- Suzuki T, Yoshida H. Low bone mineral density at femoral neck is a predictor of increased mortality in elderly Japanese women. *Osteoporos Int*. 2010; 21(1): 71-9.
- Tajima T, Nakayama E, Kondo Y, Hirai F, Ito H, Iitsuka T, Momomura M, Kutsuma H, Kodaka Y, Funaki N, Yanagawa Y, Ubukata K. Etiology and clinical study of community-acquired pneumonia in 157 hospitalized children. *J Infect Chemother*. 2006; 12(6): 372-9.
- Tajiri H, Takeuchi Y, Takano T, Ohura T, Inui A, Yamamoto K, Higashidate Y, Kawashima H, Toyoda S, Ushijima K, Ramakrishnan G, Rosenlund M, Holl K. The burden of rotavirus gastroenteritis and hospital-acquired rotavirus gastroenteritis among children aged less than 6 years in Japan: a retrospective, multicenter epidemiological survey. *BMC Pediatr*. 2013; 83.
- Takahashi S, Takeyama K, Miyamoto S, Ichihara K, Maeda T, Kunishima Y, Matsukawa M, Tsukamoto T. Incidence of sexually transmitted infections in asymptomatic healthy young Japanese men. *J Infect Chemother*. 2005; 11(6): 270-3.
- Takahashi Y, Sakai M, Tokuda Y, Takahashi O, Ohde S, Nakayama T, Fukuhara S, Fukui T, Shimbo T. The relation between self-reported body weight and health-related quality of life: a cross-sectional study in Japan. *J Public Health (Oxf)*. 2011; 33(4): 518-26.
- Takata Y, Ansai T, Soh I, Awano S, Nakamichi I, Akifusa S, Goto K, Yoshida A, Fujii H, Fujisawa R, Sonoki K. Serum total cholesterol concentration and 10-year mortality in an 85-year-old population. *Clin Interv Aging*. 2014; 9: 293-300.
- Takeda T, Koga S, Yaegashi N. Prevalence of premenstrual syndrome and premenstrual dysphoric disorder in Japanese high school students. *Arch Womens Ment Health*. 2010; 13(6): 535-7.

Takeshima T, Ishizaki K, Fukuhara Y, Ijiri T, Kusumi M, Wakutani Y, Mori M, Kawashima M, Kowa H, Adachi Y, Urakami K, Nakashima K. Population-based door-to-door survey of migraine in Japan: the Daisen study. *Headache*. 2004; 44(1): 8-19.

Tan LCS, Venketasubramanian N, Jamora RDG, Heng D. Incidence of Parkinson's disease in Singapore. *Parkinsonism Relat Disord*. 2007; 13(1): 40-3.

Tanaka E, Kiyosawa K, Sodeyama T, Hayata T, Ohike Y, Nakano Y, Yoshizawa K, Furuta S, Watanabe Y, Watanabe J, Nishioka K. Prevalence of antibody to hepatitis C virus in Japanese schoolchildren: comparison with adult blood donors. *Am J Trop Med Hyg*. 1992; 46(4): 460-4.

Tanaka H, Imai Y, Hiramatsu N, Ito Y, Imanaka K, Oshita M, Hijioka T, Katayama K, Yabuuchi I, Yoshihara H, Inoue A, Kato M, Takehara T, Tamura S, Kasahara A, Hayashi N, Tsukuma H. Declining incidence of hepatocellular carcinoma in Osaka, Japan, from 1990 to 2003. *Ann Intern Med*. 2008; 148(11): 820-6.

Tanaka K, Kiyohara Y, Kubo M, Matsumoto T, Tanizaki Y, Okubo K, Ninomiya T, Oishi Y, Shikata K, Iida M. Secular trends in the incidence, mortality, and survival rate of gastric cancer in a general Japanese population: the Hisayama study. *Cancer Causes Control*. 2005; 16(5): 573-8.

Tanaka K, Miyake Y, Arakawa M, Sasaki S, Ohya Y. Dental caries and allergic disorders in Japanese children: the Ryukyus Child Health Study. *J Asthma*. 2008; 45(9): 795-9.

Tanaka K, Miyake Y, Arakawa M, Sasaki S, Ohya Y. U-shaped association between body mass index and the prevalence of wheeze and asthma, but not eczema or rhinoconjunctivitis: the ryukyus child health study. *J Asthma*. 2011; 48(8): 804-10.

Tanaka K, Miyake Y. Association between breastfeeding and dental caries in Japanese children. *J Epidemiol*. 2012; 22(1): 72-7.

Tanaka K, Miyake Y. Association between prenatal and postnatal tobacco smoke exposure and allergies in young children. *J Asthma*. 2011; 48(5): 458-63.

Tanaka R, Itoshima T, Nagashima H. Follow-up study of 582 liver cirrhosis patients for 26 years in Japan. *Liver*. 1987; 7(6): 316-24.

Taura N, Fukushima N, Yasuhashi H, Takami Y, Seike M, Watanabe H, Mizuta T, Sasaki Y, Nagata K, Tabara A, Komorizono Y, Taketomi A, Matsumoto S, Tamai T, Muro T, Nakao K, Fukuizumi K, Maeshiro T, Inoue O, Sata M. The incidence of hepatocellular carcinoma associated with hepatitis C infection decreased in Kyushu area. *Med Sci Monit*. 2011; 17(2): PH7-11.

Tennant PWG, Pearce MS, Bythell M, Rankin J. 20-year survival of children born with congenital anomalies: a population-based study. *Lancet*. 2010; 375(9715): 649-56. and Congenital Heart Anomalies Mortality Risk With No Diagnosis or Care Estimates as provided by the Global Burden of Disease 2010 congenital anomaly expert group. [Unpublished].

Terada T, Terasaki S, Nakanuma Y. A clinicopathologic study of adenomatous hyperplasia of the liver in 209 consecutive cirrhotic livers examined by autopsy. *Cancer*. 1993; 72(5): 1551-6.

Teragaki M, Nishiguchi S, Takeuchi K, Yoshiyama M, Akioka K, Yoshikawa J. Prevalence of hepatitis C virus infection among patients with hypertrophic cardiomyopathy. *Heart Vessels*. 2003; 18(4): 167-70.

The INTERSALT Co-operative Research Group. Appendix tables. Centre-specific results by age and sex. *J Hum Hypertens* 1989;3(5):331-407.

The INTERSALT Co-operative Research Group. Appendix tables. Centre-specific results by age and sex. *J Hum Hypertens* 1989;3(5):331-407. as it appears in Global Dietary Database Consortium, Nutrition and Chronic Disease Expert Group (NutriCoDE). Global Dietary Database 1980-2011. [Unpublished].

Thongprachum A, Chan-it W, Khamrin P, Okitsu S, Nishimura S, Kikuta H, Yamamoto A, Sugita K, Baba T, Mizuguchi M, Maneekarn N, Hayakawa S, Ushijima H. Reemergence of new variant G3 rotavirus in Japanese pediatric patients, 2009-2011. *Infect Genet Evol*. 2013; 13: 168-74.

Tokushige K, Hashimoto E, Horie Y, Taniai M, Higuchi S. Hepatocellular carcinoma in Japanese patients with nonalcoholic fatty liver disease, alcoholic liver disease, and chronic liver disease of unknown etiology: report of the nationwide survey. *J Gastroenterol*. 2011; 46(10): 1230-7.

Toyama N, Shiraki K. Epidemiology of herpes zoster and its relationship to varicella in Japan: A 10-year survey of 48,388 herpes zoster cases in Miyazaki prefecture. *J Med Virol*. 2009; 81(12): 2053-8.

Tsuboi T. Prevalence and incidence of epilepsy in Tokyo. *Epilepsia*. 1988; 29(2): 103-10.

Tsuchihashi M, Tsutsui H, Kodama K, Kasagi F, Takeshita A. Clinical characteristics and prognosis of hospitalized patients with congestive heart failure--a study in Fukuoka, Japan. *Jpn Circ J*. 2000; 64(12): 953-9.

Tsukamoto T, Kumamoto Y, Masumori N, Miyake H, Rhodes T, Girman CJ, Guess HA, Jacobsen SJ, Lieber MM. Prevalence of prostatism in Japanese men in a community-based study with comparison to a similar American study. *J Urol*. 1995; 154(2 pt 1): 391-95.

Tsuzuki H, Yuasa S. [An epidemiological study of deaths in mental hospitals]. *Psychiatr Neurol Japonica*. 1981; 83(5): 275-304.

Turin TC, Kita Y, Rumana N, Nakamura Y, Takashima N, Ichikawa M, Sugihara H, Morita Y, Hirose K, Okayama A, Miura K, Ueshima H. Ischemic Stroke Subtypes in a Japanese Population Takashima Stroke Registry, 1988-2004. *Stroke*. 2010; 41(9): 1871-6.

Turin TC, Murakami Y, Miura K, Rumana N, Kita Y, Hayakawa T, Okamura T, Okayama A, Ueshima H, NIPPON DATA80/90 Research Group. Hypertension and life expectancy among Japanese: NIPPON DATA80. *Hypertens Res*. 2012; 35(9): 954-8.

U.S. Department of Agriculture (USDA). USDA Global Tobacco Database 1960-2005. Washington D.C., United States: U.S. Department of Agriculture (USDA).

U.S. Renal Data System. USRDS 1994 Annual Data Report. Bethesda (MD), United States: National Institute of Diabetes and Digestive and Kidney Diseases (NIDDK), National Institutes of Health, 1994.

U.S. Renal Data System. USRDS 1996 Annual Data Report. Bethesda (MD), United States: National Institute of Diabetes and Digestive and Kidney Diseases (NIDDK), National Institutes of Health, 1996.

U.S. Renal Data System. USRDS 1998 Annual Data Report. Bethesda (MD), United States: National Institute of Diabetes and Digestive and Kidney Diseases (NIDDK), National Institutes of Health, 1998.

Ueda K, Kawano H, Hasuo Y, Fujishima M. Prevalence and etiology of dementia in a Japanese community. *Stroke*. 1992; 23(6): 798-803.

Ueshima H, Kita Y, Choudhury SR, Asia Pacific Cohort Studies Collaboration. Japan - Konan Health and Nutrition Study 1987-1995.

Umeshima M, Sato S, Imano H, Kitamura A, Shimamura T, Yamagishi K, Tanigawa T, Iso H. Relations between protein intake and blood pressure in Japanese men and women: the Circulatory Risk in Communities Study (CIRCS). *Am J Clin Nutr*. 2009; 90(2): 377-84.

United Nations Children's Fund (UNICEF), World Health Organization (WHO). Argentina Estimates of National Immunization Coverage. Geneva, Switzerland: World Health Organization (WHO).

United Nations Children's Fund (UNICEF), World Health Organization (WHO). WHO and UNICEF Estimated Immunization Coverage Time Series 1980-2014. Geneva, Switzerland: World Health Organization (WHO), 2015.

United Nations Children's Fund (UNICEF), World Health Organization (WHO). WHO and UNICEF Reported Disease Incidence Time Series. Geneva, Switzerland: World Health Organization (WHO).

United Nations Children's Fund (UNICEF), World Health Organization (WHO). WHO and UNICEF Reported Estimates of Immunization Coverage Time Series 2014. Geneva, Switzerland: World Health Organization (WHO), 2014.

United Nations Office on Drugs and Crime (UNODC). World Drug Report 2012. Vienna, Austria: United Nations Office on Drugs and Crime (UNODC), 2012.

United Nations Office on Drugs and Crime Regional Centre for East Asia and the Pacific. Patterns and Trends of Amphetamine-Type Stimulants (ATS) and Other Drugs of Abuse in East Asia and the Pacific 2005. Bangkok, Thailand: United Nations Office on Drugs and Crime Regional Centre for East Asia and the Pacific, 2006.

United Nations Population Division. Trends in International Migrant Stock: Migrants by Destination and Origin - 2013 Revision. New York City, United States: United Nations Population Division.

United Nations Population Division. United Nations World Population Prospects 1950-2100 - 2010 Revision. New York City, United States: United Nations Population Division, 2011.

United Nations Statistics Division (UNSD). National Accounts Main Aggregates Database. New York City, United States: United Nations Statistics Division (UNSD).

United States Renal Data System Coordinating Center. USRDS 1997 Annual Data Report: Atlas of End-Stage Renal Disease in the United States. Bethesda, United States: National Institute of Diabetes and Digestive and Kidney Diseases (NIDDK), National Institutes of Health, 1997.

United States Renal Data System Coordinating Center. USRDS 2008 Annual Data Report: Atlas of Chronic Kidney Disease and End-Stage Renal Disease in the United States. Bethesda, United States: National Institute of Diabetes and Digestive and Kidney Diseases (NIDDK), National Institutes of Health, 2008.

United States Renal Data System Coordinating Center. USRDS 2010 Annual Data Report: Atlas of Chronic Kidney Disease and End-Stage Renal Disease in the United States. Bethesda, United States: National Institute of Diabetes and Digestive and Kidney Diseases (NIDDK), National Institutes of Health, 2010.



- United States Renal Data System. 2015 USRDS Annual Data Report: Epidemiology of Kidney Disease in the United States. National Institutes of Health, National Institute of Diabetes and Digestive and Kidney Diseases, Bethesda, MD, 2015.
- Wada-Isoe K, Uemura Y, Suto Y, Doi K, Inamura K, Hayashi A, Kitayama M, Watanabe Y, Adachi Y, Nakashima K. Prevalence of dementia in the rural island town of Ama-cho, Japan. *Neuroepidemiology*. 2009; 32(2): 101-6.
- Wakabayashi I, Groschner K. Age-dependent associations of smoking and drinking with non-high-density lipoprotein cholesterol. *Metab Clin Exp*. 2010; 59(7): 1074-81.
- Wakabayashi I. Cross-sectional relationship between alcohol consumption and prevalence of metabolic syndrome in Japanese men and women. *J Atheroscler Thromb*. 2010; 17(7): 695-704.
- Wakai K, Nakai S, Shinzato T, Kawamura T, Tamakoshi A, Aoki R, Kojima M, Lin Y, Nakayama T, Maeda K, Ohno Y. Estimated number of patients with chronic renal failure but not with end-stage renal disease in Japan: comparisons between two estimation methods. *J Epidemiol*. 1998; 8(5): 278-84.
- Wakasugi M, James Kazama J, Narita I. Associations between the intake of miso soup and Japanese pickles and the estimated 24-hour urinary sodium excretion: a population-based cross-sectional study. *Intern Med*. 2015; 54(8): 903-10.
- Waki K, Noda M, Sasaki S, Matsumura Y, Takahashi Y, Isogawa A, Ohashi Y, Kadowaki T, Tsugane S, JPHC Study Group. Alcohol consumption and other risk factors for self-reported diabetes among middle-aged Japanese: a population-based prospective study in the JPHC study cohort I. *Diabet Med*. 2005; 22(3): 323-31.
- Wang B-E, Ma W-M, Sulaiman A, Noer S, Sumoharjo S, Sumarsidi D, Tandon BN, Nakao K, Mishiro S, Miyakawa Y, Akahane Y, Suzuki H. Demographic, clinical, and virological characteristics of hepatocellular carcinoma in Asia: survey of 414 patients from four countries. *J Med Virol*. 2002; 67(3): 394-400.
- Watabe H, Shiratori Y, Tateishi R, Fujishima T, Akamatsu M, Koike Y, Obi S, Hamamura K, Sato S, Teratani T, Shiina S, Omata M. Clinical features of patients with HCC who are negative for both HBV and HCV markers. *Hepatogastroenterology*. 2003; 50(54): 2157-60.
- Watanabe T, Ishihara N, Miyasaka M, Koizumi A, Fujita H, Ikeda M. Hemoglobin levels among Japanese farmers: with special reference to climate and work intensity. *Hum Biol*. 1986; 58(2): 197-208. as it appears in World Health Organization (WHO). WHO Global Database on Anemia, Nutrition Landscape Information System. Geneva, Switzerland: World Health Organization (WHO).
- Weingourt R, Maruyama T, Sawada I, Yoshino J. Domestic violence and women's mental health in Japan. *Int Nurs Rev*. 2001; 48(2): 102-8.
- Whooping Cough Case Fatality Rate Estimates as provided by the Global Burden of Disease 2010 Pertussis Expert Group. [Unpublished].
- Wilks R, Rotimi C, Bennett F, McFarlane-Anderson N, Kaufman JS, Anderson SG, Cooper RS, Cruickshank JK, Forrester T. Diabetes in the Caribbean: results of a population survey from Spanish Town, Jamaica. *Diabet Med*. 1999; 16(10): 875-83.
- World Bank. World Development Indicators. Washington DC, United States: World Bank.
- World Energy Council. Survey of Energy Resources 2010. London, United Kingdom: World Energy Council, 2010.
- World Health Organization (WHO). Control of Foodborne Trematode Infections 1995. Geneva, Switzerland: World Health Organization (WHO), 1995.
- World Health Organization (WHO). Distribution of Trachoma, Worldwide 2012 [map]. Geneva, Switzerland: World Health Organization (WHO), 2013.
- World Health Organization (WHO). Global leprosy situation, 2004. *Wkly Epidemiol Rec*. 2005; 80(13): 118-24.
- World Health Organization (WHO). Global leprosy situation, 2005. *Wkly Epidemiol Rec*. 2005; 80(34): 289-95.
- World Health Organization (WHO). Global leprosy situation, 2006. *Wkly Epidemiol Rec*. 2006; 81(32): 309-16.
- World Health Organization (WHO). Global leprosy situation, 2007. *Wkly Epidemiol Rec*. 2007; 82(25): 225-32.
- World Health Organization (WHO). Global leprosy situation, 2008 (additional information). *Wkly Epidemiol Rec*. 2008; 83(50): 459.
- World Health Organization (WHO). Global leprosy situation, 2009. *Wkly Epidemiol Rec*. 2009; 84(33): 333-40.
- World Health Organization (WHO). Global leprosy situation, 2010. *Wkly Epidemiol Rec*. 2010; 85(35): 337-48.
- World Health Organization (WHO). Global leprosy: update on the 2012 situation. *Wkly Epidemiol Rec*. 2013; 88(35): 365-79.
- World Health Organization (WHO). Japan - Ryu Kyu Islands Vital Registration - Deaths 1970 ICD7. Geneva, Switzerland: World Health Organization (WHO), 2004. as it appears in World Health Organization (WHO). WHO Mortality Database Version July 2012. Geneva, Switzerland: World Health Organization (WHO), 2012.
- World Health Organization (WHO). Japan - Ryu Kyu Islands Vital Registration - Deaths 1971 ICD8. Geneva, Switzerland: World Health Organization (WHO), 2013. as it appears in World Health Organization (WHO). WHO Mortality Database Version July 2012. Geneva, Switzerland: World Health Organization (WHO), 2012.
- World Health Organization (WHO). Leprosy update, 2011. *Wkly Epidemiol Rec*. 2011; 86(36): 389-99.
- World Health Organization (WHO). Progress towards eliminating leprosy as a public health problem. Part I. *Wkly Epidemiol Rec*. 1994; 69(20): 145-51.
- World Health Organization (WHO). Progress towards the elimination of leprosy as a public health problem. Part I. *Wkly Epidemiol Rec*. 1995; 70(25): 177-82.
- World Health Organization (WHO). WHO Global Health Observatory - Cholera: Number of Reported Cases by Country. Geneva, Switzerland: World Health Organization (WHO).
- World Health Organization (WHO). WHO Global Health Observatory - Recorded Alcohol Per Capita Consumption 1960-1979. Geneva, Switzerland: World Health Organization (WHO).
- World Health Organization (WHO). WHO Global Health Observatory - Recorded Alcohol Per Capita Consumption 1980-1999. Geneva, Switzerland: World Health Organization (WHO).
- World Health Organization (WHO). WHO Global Health Observatory - Recorded Alcohol Per Capita Consumption from 2000. Geneva, Switzerland: World Health Organization (WHO).
- World Health Organization (WHO). WHO Tuberculosis Case Notifications. Geneva, Switzerland: World Health Organization (WHO).
- World Health Organization (WHO). WHO Urban Ambient Air Pollution Database Draft 2016.
- World Health Organization (WHO). WHO World Mental Health Survey Prevalence of Alcohol Use, Abuse, and Dependence Tabulations.
- World Health Organization (WHO). WHO World Mental Health Surveys: Global Perspectives on the Epidemiology of Mental Disorders. Cambridge, United Kingdom: Cambridge University Press, 2008.
- World Health Organization (WHO). World Health Statistics 2013. Geneva, Switzerland: World Health Organization (WHO), 2013.
- World Health Organization Regional Office for the Western Pacific (WPRO-WHO). Number of Reported Cases of Dengue Fever and Dengue Hemorrhagic Fever in the Western Pacific Region, by Country 2000. Manila, Philippines: World Health Organization Regional Office for the Western Pacific (WPRO-WHO).
- World Health Organization Regional Office for the Western Pacific (WPRO-WHO). Number of Reported Cases of Dengue Fever and Dengue Hemorrhagic Fever in the Western Pacific Region, by Country 2001. Manila, Philippines: World Health Organization Regional Office for the Western Pacific (WPRO-WHO).
- World Health Organization Regional Office for the Western Pacific (WPRO-WHO). Number of Reported Cases of Dengue Fever and Dengue Hemorrhagic Fever in the Western Pacific Region, by Country 2002. Manila, Philippines: World Health Organization Regional Office for the Western Pacific (WPRO-WHO).
- World Health Organization Regional Office for the Western Pacific (WPRO-WHO). Number of Reported Cases of Dengue Fever and Dengue Hemorrhagic Fever in the Western Pacific Region, by Country 2003. Manila, Philippines: World Health Organization Regional Office for the Western Pacific (WPRO-WHO).
- World Health Organization Regional Office for the Western Pacific (WPRO-WHO). Number of Reported Cases of Dengue Fever and Dengue Hemorrhagic Fever in the Western Pacific Region, by Country 2004. Manila, Philippines: World Health Organization Regional Office for the Western Pacific (WPRO-WHO).
- World Health Organization Regional Office for the Western Pacific (WPRO-WHO). Number of Reported Cases of Dengue Fever and Dengue Hemorrhagic Fever in the Western Pacific Region, by Country 2005. Manila, Philippines: World Health Organization Regional Office for the Western Pacific (WPRO-WHO).
- World Health Organization Regional Office for the Western Pacific (WPRO-WHO). Number of Reported Cases of Dengue Fever and Dengue Hemorrhagic Fever in the Western Pacific Region, by Country 2006. Manila, Philippines: World Health Organization Regional Office for the Western Pacific (WPRO-WHO).

- World Health Organization Regional Office for the Western Pacific (WPRO-WHO). Number of Reported Cases of Dengue Fever and Dengue Hemorrhagic Fever in the Western Pacific Region, by Country 2007. Manila, Philippines: World Health Organization Regional Office for the Western Pacific (WPRO-WHO).
- World Health Organization Regional Office for the Western Pacific (WPRO-WHO). Number of Reported Cases of Dengue Fever and Dengue Hemorrhagic Fever in the Western Pacific Region, by Country 2008. Manila, Philippines: World Health Organization Regional Office for the Western Pacific (WPRO-WHO).
- World Health Organization Regional Office for the Western Pacific (WPRO-WHO). Number of Reported Cases of Dengue Fever and Dengue Hemorrhagic Fever in the Western Pacific Region, by Country 2009. Manila, Philippines: World Health Organization Regional Office for the Western Pacific (WPRO-WHO).
- World Health Organization Regional Office for the Western Pacific (WPRO-WHO). Number of Reported Cases of Dengue Fever and Dengue Hemorrhagic Fever in the Western Pacific Region, by Country 2010. Manila, Philippines: World Health Organization Regional Office for the Western Pacific (WPRO-WHO).
- Worldwide variations in the prevalence of asthma symptoms: the International Study of Asthma and Allergies in Childhood (ISAAC). *Eur Respir J*. 1998; 12(2): 315-35.
- Yamada K, Matsudaira K, Takeshita K, Oka H, Hara N, Takagi Y. Prevalence of low back pain as the primary pain site and factors associated with low health-related quality of life in a large Japanese population: a pain-associated cross-sectional epidemiological survey. *Mod Rheumatol*. 2014; 24(2): 343-8.
- Yamada K, Takasaki T, Nawa M, Nakayama M, Arai YT, Morimoto K, Yabe S, Kurane I. Demographic Features of Imported Dengue Fever Cases Serodiagnosed in Japan during 2000. *Dengue Bull*. 2000; 24: 42-5.
- Yamada Y, Hattori H, Miura A, Tanabe M, Yamori Y. Prevalence of Alzheimer's disease, vascular dementia and dementia with Lewy bodies in a Japanese population. *Psychiatry Clin Neurosci*. 2001; 55(1): 21-5.
- Yamada T, Kuwata T, Matsuda H, Deguchi K, Morikawa M, Yamada T, Furuya K, Matsubara S, Minakami H. Risk factors of eclampsia other than hypertension: pregnancy-induced antithrombin deficiency and extraordinary weight gain. *Hypertens Pregnancy*. 2012; 31(2): 268-77.
- Yamada Y, Ando F, Niino N, Ohta S, Shimokata H. Association of polymorphisms of the estrogen receptor alpha gene with bone mineral density of the femoral neck in elderly Japanese women. *J Mol Med*. 2002; 80(7): 452-60.
- Yamagata K, Takahashi H, Suzuki S, Mase K, Hagiwara M, Shimizu Y, Hirayama K, Kobayashi M, Narita M, Koyama A. Age distribution and yearly changes in the incidence of ESRD in Japan. *Am J Kidney Dis*. 2004; 43(3): 433-43.
- Yamamoto A, Temba H, Horibe H, Mabuchi H, Saito Y, Matsuzawa Y, Kita T, Nakamura H. Life Style and Cardiovascular Risk Factors in the Japanese Population - From an Epidemiological Survey on Serum Lipid Levels in Japan 1990. Part 2: Association of Lipid Parameters with Hypertension. *J Atheroscler Thromb*. 2003; 10(3): 176-85.
- Yamawaki M, Kusumi M, Kowa H, Nakashima K. Changes in prevalence and incidence of Parkinson's disease in Japan during a quarter of a century. *Neuroepidemiology*. 2009; 32(4): 263-9.
- Yasui T, Iguchi M, Suzuki S, Kohri K. Prevalence and epidemiological characteristics of urolithiasis in Japan: national trends between 1965 and 2005. *Urology*. 2008; 71(2): 209-13.
- Yasui T, Okada A, Hamamoto S, Hirose M, Ando R, Kubota Y, Tozawa K, Hayashi Y, Gao B, Suzuki S, Kohri K. The association between the incidence of urolithiasis and nutrition based on Japanese National Health and Nutrition Surveys. *Urolithiasis*. 2013; 41(3): 217-24.
- Yokoyama A, Omori T, Yokoyama T, Kawakubo H, Mori S, Matsui T, Maruyama K. Chronic atrophic gastritis and metachronous gastric cancer in Japanese alcoholic men with esophageal squamous cell carcinoma. *Alcohol Clin Exp Res*. 2009; 33(5): 898-905.
- Yonemitsu M, Sutcliffe P. Comparative study of oral health status between Scottish and Japanese schoolchildren aged 6-11 years. *Community Dent Oral Epidemiol*. 1992; 20(6): 354-8.
- Yoneyama K, Miyagishi K, Kiuchi Y, Shibata M, Mitamura K. Risk factors for infections in cirrhotic patients with and without hepatocellular carcinoma. *J Gastroenterol*. 2002; 37(12): 1028-34.
- Yoshida M, Kita Y, Nakamura Y, Nozaki A, Okayama A, Sugihara H, Kasamatsu T, Hirose K, Kinoshita M, Ueshima H. Incidence of acute myocardial infarction in Takashima, Shiga, Japan. *Circ J*. 2005; 69(4): 404-8.
- Yoshida O, Terai A, Ohkawa T, Okada Y. National trend of the incidence of urolithiasis in Japan from 1965 to 1995. *Kidney Int*. 1999; 56(5): 1899-904.
- Yoshida T, Katsurashima T, Abe K, Kato A, Suzuki K, Sasaki S, Ikuta T, Narita T, Isogai K, Moriai O, Murakami A, Ono M, Watanabe T, Abe H, Ueda S, Saito Y, Takahashi T, Kooka F, Chiba T, Katsura Y, Ono Y, Kosaka Y, Yasumi S, Kawata T, Sato S. [Regional difference in the etiology of liver cirrhosis in Iwate]. *Jpn J Gastroenterol*. 1997; 94(12): 826-33.
- Yoshiike N, Seino F, Tajima S, Arai Y, Kawano M, Furuhashi T, Inoue S. Twenty-year changes in the prevalence of overweight in Japanese adults: The National Nutrition Survey 1976-95. *Obes Rev*. 2002; 3(3): 183-90.
- Yoshikawa M, Tsujii T, Fukui H, Yamao J, Tsukamoto N, Nishimura N, Kyo M, Takaya A, Tsujii H, Nakano H. Hepatitis C virus infection in patients with chronic liver diseases. *Gastroenterol Jpn*. 1991; 26(Suppl 3): 202-5.
- Yoshimura N, Hashimoto T, Morioka S, Sakata K, Kasamatsu T, Cooper C. Determinants of bone loss in a rural Japanese community: the Taiji Study. *Osteoporos Int*. 1998; 8(6): 604-10.
- Yoshimura N, Muraki S, Oka H, Mabuchi A, En-Yo Y, Yoshida M, Saika A, Yoshida H, Suzuki T, Yamamoto S, Ishibashi H, Kawaguchi H, Nakamura K, Akune T. Prevalence of knee osteoarthritis, lumbar spondylosis, and osteoporosis in Japanese men and women: the research on osteoarthritis/osteoporosis against disability study. *J Bone Miner Metab*. 2009; 27(5): 620-8.
- Yoshimura N, Muraki S, Oka H, Tanaka S, Kawaguchi H, Nakamura K, Akune T. Accumulation of metabolic risk factors such as overweight, hypertension, dyslipidaemia, and impaired glucose tolerance raises the risk of occurrence and progression of knee osteoarthritis: a 3-year follow-up of the ROAD study. *Osteoarthr Cartil*. 2012; 20(11): 1217-26.
- Yura A, Shimizu T. Trends in the prevalence of atopic dermatitis in school children: longitudinal study in Osaka Prefecture, Japan, from 1985 to 1997. *Br J Dermatol*. 2001; 145(6): 966-73.

**Web Table 2: Age-standardised rates of mortality, life expectancy from birth, and healthy life expectancy (HALE) for Japan and the 47 prefectures in 1990 and 2015 for both sexes combined (A), men (B), and women (C).**

| A (Both sexes combined) |                                                 |                           |                             |                          |                        |                             |                                            |                        |                             |
|-------------------------|-------------------------------------------------|---------------------------|-----------------------------|--------------------------|------------------------|-----------------------------|--------------------------------------------|------------------------|-----------------------------|
|                         | Age-standardize mortality rate<br>(per 100 000) |                           |                             | Life expectancy in years |                        |                             | HALE<br>(healthy life expectancy in years) |                        |                             |
|                         | 1990                                            | 2015                      | Percent change<br>1990–2015 | 1990                     | 2015                   | Percent change<br>1990–2015 | 1990                                       | 2015                   | Percent change<br>1990–2015 |
| Japan                   | 584.1<br>(583.2 to 585.1)                       | 414.8<br>(413.3 to 416.4) | -29.0<br>(-29.3 to -28.7)   | 79.0<br>(79.0 to 79.0)   | 83.2<br>(83.1 to 83.2) | 5.3<br>(5.2 to 5.3)         | 70.4<br>(67.8 to 72.6)                     | 73.9<br>(71.3 to 76.3) | 5.1<br>(4.9 to 5.2)         |
| Hokkaido                | 597.2<br>(591.6 to 602.9)                       | 416.9<br>(404.3 to 427.6) | -30.2<br>(-32.5 to -28.3)   | 78.7<br>(78.6 to 78.8)   | 83.1<br>(82.8 to 83.4) | 5.6<br>(5.1 to 6.1)         | 70.2<br>(67.7 to 72.4)                     | 73.9<br>(71.3 to 76.3) | 5.3<br>(5.0 to 5.7)         |
| Aomori                  | 641.5<br>(634.4 to 647.7)                       | 471.0<br>(461.0 to 481.5) | -26.6<br>(-28.3 to -24.8)   | 77.7<br>(77.6 to 77.8)   | 81.6<br>(81.4 to 81.8) | 5.0<br>(4.6 to 5.4)         | 69.3<br>(66.8 to 71.5)                     | 72.6<br>(70.0 to 74.9) | 4.8<br>(4.4 to 5.1)         |
| Iwate                   | 601.6<br>(594.8 to 608.1)                       | 441.6<br>(431.8 to 452.2) | -26.6<br>(-28.5 to -24.7)   | 78.6<br>(78.4 to 78.7)   | 82.4<br>(82.1 to 82.6) | 4.8<br>(4.3 to 5.4)         | 70.0<br>(67.5 to 72.2)                     | 73.2<br>(70.6 to 75.5) | 4.5<br>(3.9 to 5.0)         |
| Miyagi                  | 573.9<br>(568.1 to 580.2)                       | 397.1<br>(388.5 to 406.1) | -30.8<br>(-32.4 to -29.0)   | 79.2<br>(79.1 to 79.3)   | 83.7<br>(83.4 to 83.9) | 5.7<br>(5.2 to 6.1)         | 70.5<br>(67.9 to 72.7)                     | 74.2<br>(71.5 to 76.6) | 5.2<br>(4.7 to 5.7)         |
| Akita                   | 592.2<br>(585.4 to 598.3)                       | 445.5<br>(434.9 to 455.4) | -24.8<br>(-26.7 to -23.0)   | 78.8<br>(78.6 to 78.9)   | 82.3<br>(82.1 to 82.5) | 4.4<br>(4.1 to 5.0)         | 70.2<br>(67.7 to 72.4)                     | 73.2<br>(70.6 to 75.5) | 4.2<br>(3.9 to 4.6)         |
| Yamagata                | 543.2<br>(536.9 to 550.0)                       | 411.0<br>(400.4 to 420.8) | -24.3<br>(-26.7 to -22.3)   | 79.9<br>(79.8 to 80.0)   | 83.2<br>(83.0 to 83.5) | 4.1<br>(3.8 to 4.6)         | 71.2<br>(68.7 to 73.4)                     | 74.0<br>(71.3 to 76.4) | 4.0<br>(3.7 to 4.3)         |
| Fukushima               | 585.3<br>(577.3 to 592.6)                       | 423.9<br>(412.5 to 436.0) | -27.5<br>(-29.9 to -25.3)   | 78.9<br>(78.7 to 79.0)   | 82.9<br>(82.6 to 83.2) | 5.1<br>(4.6 to 5.7)         | 70.2<br>(67.7 to 72.4)                     | 73.7<br>(71.0 to 76.0) | 5.0<br>(4.6 to 5.3)         |
| Ibaraki                 | 595.6<br>(591.0 to 600.6)                       | 431.4<br>(423.2 to 440.1) | -27.6<br>(-29.1 to -26.1)   | 78.6<br>(78.6 to 78.7)   | 82.7<br>(82.5 to 82.8) | 5.2<br>(4.8 to 5.3)         | 70.0<br>(67.5 to 72.2)                     | 73.5<br>(70.8 to 75.9) | 4.9<br>(4.7 to 5.2)         |
| Tochigi                 | 610.6<br>(604.3 to 616.8)                       | 428.4<br>(418.9 to 437.2) | -29.8<br>(-31.5 to -28.2)   | 78.4<br>(78.3 to 78.5)   | 82.8<br>(82.6 to 83.0) | 5.6<br>(5.2 to 6.0)         | 69.9<br>(67.4 to 72.1)                     | 73.7<br>(71.0 to 76.0) | 5.4<br>(5.1 to 5.7)         |
| Gunma                   | 573.2<br>(567.2 to 579.0)                       | 421.0<br>(411.7 to 430.0) | -26.6<br>(-28.3 to -24.8)   | 79.2<br>(79.1 to 79.3)   | 83.0<br>(82.7 to 83.2) | 4.8<br>(4.3 to 5.2)         | 70.2<br>(67.6 to 72.5)                     | 73.5<br>(70.7 to 76.0) | 4.6<br>(4.3 to 4.9)         |
| Saitama                 | 590.6<br>(586.6 to 594.7)                       | 428.6<br>(421.1 to 436.0) | -27.4<br>(-28.7 to -26.1)   | 79.0<br>(78.9 to 79.0)   | 82.8<br>(82.6 to 82.9) | 4.8<br>(4.6 to 5.1)         | 70.4<br>(67.9 to 72.6)                     | 73.6<br>(71.0 to 76.0) | 4.6<br>(4.3 to 4.8)         |
| Chiba                   | 575.5<br>(571.6 to 579.5)                       | 416.3<br>(410.1 to 423.1) | -27.7<br>(-28.9 to -26.4)   | 79.2<br>(79.2 to 79.3)   | 83.1<br>(82.9 to 83.2) | 4.9<br>(4.5 to 5.1)         | 70.6<br>(68.1 to 72.8)                     | 73.9<br>(71.2 to 76.2) | 4.7<br>(4.4 to 4.9)         |
| Tokyo                   | 581.8<br>(578.2 to 585.4)                       | 410.5<br>(403.5 to 417.4) | -29.4<br>(-30.8 to -28.1)   | 79.1<br>(79.0 to 79.1)   | 83.3<br>(83.2 to 83.5) | 5.3<br>(5.2 to 5.7)         | 70.5<br>(68.0 to 72.8)                     | 74.2<br>(71.5 to 76.5) | 5.2<br>(4.9 to 5.4)         |
| Kanagawa                | 571.2<br>(567.6 to 574.6)                       | 407.8<br>(401.3 to 414.4) | -28.6<br>(-29.9 to -27.4)   | 79.3<br>(79.2 to 79.4)   | 83.4<br>(83.2 to 83.5) | 5.2<br>(4.8 to 5.4)         | 70.7<br>(68.2 to 72.9)                     | 74.2<br>(71.5 to 76.6) | 4.9<br>(4.6 to 5.1)         |
| Niigata                 | 547.7<br>(540.1 to 555.2)                       | 405.0<br>(393.4 to 417.5) | -26.1<br>(-28.3 to -23.4)   | 79.8<br>(79.6 to 79.9)   | 83.5<br>(83.2 to 83.8) | 4.6<br>(4.1 to 5.3)         | 70.8<br>(68.2 to 73.1)                     | 73.8<br>(71.1 to 76.3) | 4.3<br>(3.8 to 4.6)         |
| Toyama                  | 561.3<br>(554.5 to 567.8)                       | 401.8<br>(392.6 to 411.9) | -28.4<br>(-30.4 to -26.5)   | 79.4<br>(79.3 to 79.5)   | 83.5<br>(83.3 to 83.7) | 5.2<br>(4.8 to 5.5)         | 70.6<br>(68.0 to 72.9)                     | 74.1<br>(71.4 to 76.5) | 5.0<br>(4.7 to 5.3)         |
| Ishikawa                | 541.8<br>(535.6 to 548.3)                       | 390.9<br>(382.5 to 398.9) | -27.8<br>(-29.6 to -26.1)   | 79.9<br>(79.8 to 80.0)   | 83.9<br>(83.7 to 84.1) | 5.0<br>(4.6 to 5.4)         | 71.1<br>(68.6 to 73.4)                     | 74.5<br>(71.8 to 76.9) | 4.8<br>(4.5 to 5.1)         |
| Fukui                   | 534.2<br>(527.4 to 542.2)                       | 381.2<br>(371.8 to 390.1) | -28.6<br>(-30.7 to -26.7)   | 80.1<br>(79.9 to 80.2)   | 84.2<br>(84.0 to 84.4) | 5.1<br>(4.7 to 5.6)         | 71.3<br>(68.7 to 73.5)                     | 74.8<br>(72.0 to 77.2) | 5.0<br>(4.6 to 5.3)         |
| Yamanashi               | 589.4<br>(578.5 to 600.4)                       | 407.8<br>(394.1 to 422.4) | -30.8<br>(-33.6 to -28.2)   | 78.8<br>(78.6 to 79.0)   | 83.4<br>(83.0 to 83.7) | 5.8<br>(5.1 to 6.5)         | 70.3<br>(67.8 to 72.4)                     | 74.2<br>(71.6 to 76.5) | 5.6<br>(5.2 to 6.1)         |
| Nagano                  | 526.9<br>(519.0 to 534.5)                       | 380.6<br>(369.5 to 391.5) | -27.9<br>(-30.0 to -25.2)   | 80.2<br>(80.1 to 80.4)   | 84.2<br>(83.9 to 84.5) | 5.0<br>(4.4 to 5.5)         | 71.5<br>(68.9 to 73.7)                     | 74.9<br>(72.1 to 77.3) | 4.7<br>(4.3 to 5.1)         |
| Gifu                    | 562.0<br>(554.0 to 570.8)                       | 408.0<br>(395.3 to 420.4) | -27.4<br>(-29.9 to -25.0)   | 79.5<br>(79.3 to 79.6)   | 83.3<br>(83.0 to 83.6) | 4.8<br>(4.3 to 5.4)         | 70.6<br>(68.0 to 73.0)                     | 74.0<br>(71.3 to 76.3) | 4.7<br>(4.3 to 5.1)         |
| Shizuoka                | 559.7<br>(555.9 to 564.0)                       | 408.7<br>(401.7 to 415.5) | -27.0<br>(-28.4 to -25.7)   | 79.5<br>(79.4 to 79.6)   | 83.3<br>(83.2 to 83.5) | 4.8<br>(4.5 to 5.2)         | 70.8<br>(68.2 to 73.0)                     | 74.0<br>(71.3 to 76.4) | 4.6<br>(4.4 to 4.8)         |
| Aichi                   | 588.9<br>(585.1 to 593.0)                       | 417.2<br>(410.7 to 423.5) | -29.2<br>(-30.3 to -27.9)   | 79.0<br>(78.9 to 79.1)   | 83.1<br>(82.9 to 83.2) | 5.2<br>(4.8 to 5.4)         | 70.4<br>(67.9 to 72.6)                     | 73.9<br>(71.2 to 76.2) | 4.9<br>(4.7 to 5.2)         |
| Mie                     | 563.1                                           | 398.5                     | -29.2                       | 79.4                     | 83.6                   | 5.3                         | 70.7                                       | 74.3                   | 5.1                         |

|           |                           |                           |                           |                        |                        |                     |                        |                        |                     |
|-----------|---------------------------|---------------------------|---------------------------|------------------------|------------------------|---------------------|------------------------|------------------------|---------------------|
|           | (557.1 to 568.6)          | (390.4 to 406.0)          | (-30.8 to -27.6)          | (79.3 to 79.5)         | (83.4 to 83.8)         | (4.9 to 5.7)        | (68.1 to 72.9)         | (71.6 to 76.7)         | (4.8 to 5.4)        |
| Shiga     | 540.4<br>(531.7 to 549.4) | 365.3<br>(354.2 to 376.9) | -32.4<br>(-34.8 to -30.0) | 79.9<br>(79.7 to 80.1) | 84.7<br>(84.4 to 85.0) | 6.0<br>(5.4 to 6.6) | 71.2<br>(68.6 to 73.4) | 75.3<br>(72.6 to 77.7) | 5.7<br>(5.3 to 6.1) |
| Kyoto     | 559.2<br>(554.4 to 564.0) | 391.5<br>(383.0 to 400.2) | -30.0<br>(-31.6 to -28.3) | 79.5<br>(79.4 to 79.6) | 83.8<br>(83.7 to 84.0) | 5.4<br>(5.2 to 5.8) | 70.9<br>(68.3 to 73.1) | 74.6<br>(71.9 to 77.0) | 5.3<br>(5.0 to 5.5) |
| Osaka     | 634.4<br>(629.7 to 638.6) | 440.1<br>(430.3 to 449.5) | -30.6<br>(-32.3 to -29.0) | 78.0<br>(77.9 to 78.1) | 82.5<br>(82.3 to 82.7) | 5.8<br>(5.4 to 6.2) | 69.6<br>(67.2 to 71.8) | 73.4<br>(70.8 to 75.7) | 5.5<br>(5.2 to 5.8) |
| Hyogo     | 604.6<br>(600.0 to 609.2) | 413.4<br>(405.6 to 422.1) | -31.7<br>(-33.1 to -30.2) | 78.6<br>(78.5 to 78.6) | 83.2<br>(83.0 to 83.4) | 5.9<br>(5.6 to 6.2) | 69.9<br>(67.4 to 72.1) | 73.8<br>(71.1 to 76.1) | 5.5<br>(5.1 to 5.9) |
| Nara      | 557.4<br>(551.2 to 563.6) | 382.6<br>(374.4 to 391.6) | -31.4<br>(-33.1 to -29.6) | 79.5<br>(79.4 to 79.7) | 84.1<br>(83.9 to 84.3) | 5.8<br>(5.3 to 6.2) | 70.8<br>(68.3 to 73.1) | 74.7<br>(72.0 to 77.1) | 5.5<br>(5.2 to 5.8) |
| Wakayama  | 619.4<br>(610.4 to 629.4) | 423.8<br>(410.8 to 438.9) | -31.6<br>(-33.7 to -29.1) | 78.2<br>(78.1 to 78.4) | 82.9<br>(82.6 to 83.2) | 6.0<br>(5.4 to 6.5) | 69.7<br>(67.2 to 71.9) | 73.7<br>(71.0 to 76.1) | 5.8<br>(5.3 to 6.2) |
| Tottori   | 597.2<br>(585.3 to 611.3) | 427.4<br>(414.1 to 442.4) | -28.5<br>(-31.1 to -25.3) | 78.7<br>(78.4 to 78.9) | 82.8<br>(82.5 to 83.1) | 5.2<br>(4.6 to 6.0) | 70.1<br>(67.6 to 72.4) | 73.6<br>(71.0 to 76.0) | 5.0<br>(4.5 to 5.5) |
| Shimane   | 579.4<br>(568.1 to 591.5) | 410.4<br>(395.0 to 426.2) | -29.1<br>(-32.2 to -26.2) | 79.0<br>(78.8 to 79.2) | 83.3<br>(83.0 to 83.7) | 5.4<br>(4.8 to 6.2) | 70.4<br>(67.9 to 72.7) | 74.1<br>(71.5 to 76.5) | 5.2<br>(4.8 to 5.7) |
| Okayama   | 567.4<br>(561.4 to 573.3) | 399.4<br>(390.8 to 408.2) | -29.6<br>(-31.3 to -28.0) | 79.3<br>(79.2 to 79.4) | 83.6<br>(83.4 to 83.8) | 5.4<br>(5.0 to 5.8) | 70.6<br>(68.1 to 72.9) | 74.4<br>(71.7 to 76.8) | 5.3<br>(5.0 to 5.6) |
| Hiroshima | 569.9<br>(565.2 to 574.3) | 407.1<br>(399.4 to 415.0) | -28.6<br>(-29.9 to -27.1) | 79.2<br>(79.1 to 79.3) | 83.4<br>(83.2 to 83.5) | 5.3<br>(4.9 to 5.6) | 70.6<br>(68.0 to 72.8) | 74.2<br>(71.5 to 76.5) | 5.1<br>(4.9 to 5.4) |
| Yamaguchi | 599.0<br>(593.1 to 604.7) | 416.9<br>(407.1 to 425.7) | -30.4<br>(-32.1 to -28.7) | 78.6<br>(78.5 to 78.7) | 83.1<br>(82.9 to 83.3) | 5.7<br>(5.3 to 6.1) | 70.1<br>(67.5 to 72.3) | 73.9<br>(71.2 to 76.3) | 5.5<br>(5.2 to 5.8) |
| Tokushima | 607.6<br>(595.7 to 619.5) | 425.2<br>(409.9 to 440.2) | -30.0<br>(-32.8 to -27.3) | 78.4<br>(78.2 to 78.7) | 82.8<br>(82.5 to 83.1) | 5.6<br>(4.8 to 6.3) | 69.7<br>(67.2 to 72.0) | 73.5<br>(70.8 to 75.9) | 5.4<br>(4.9 to 5.9) |
| Kagawa    | 577.0<br>(570.5 to 583.7) | 415.9<br>(407.3 to 424.8) | -28.0<br>(-29.6 to -26.2) | 79.1<br>(79.0 to 79.2) | 83.1<br>(82.9 to 83.3) | 5.1<br>(4.7 to 5.4) | 70.4<br>(67.9 to 72.7) | 73.8<br>(71.2 to 76.2) | 4.8<br>(4.5 to 5.2) |
| Ehime     | 599.8<br>(589.7 to 611.3) | 434.0<br>(420.5 to 448.6) | -27.6<br>(-30.2 to -25.0) | 78.6<br>(78.4 to 78.8) | 82.6<br>(82.3 to 82.9) | 5.1<br>(4.4 to 5.7) | 70.0<br>(67.5 to 72.2) | 73.4<br>(70.7 to 75.8) | 4.9<br>(4.4 to 5.3) |
| Kochi     | 626.7<br>(618.3 to 634.1) | 439.6<br>(428.5 to 449.5) | -29.9<br>(-31.7 to -28.0) | 78.0<br>(77.9 to 78.1) | 82.4<br>(82.2 to 82.7) | 5.6<br>(5.2 to 6.2) | 69.2<br>(66.5 to 71.5) | 73.0<br>(70.2 to 75.4) | 5.5<br>(5.1 to 5.8) |
| Fukuoka   | 595.0<br>(590.9 to 599.1) | 406.1<br>(398.7 to 414.0) | -31.8<br>(-33.0 to -30.4) | 78.7<br>(78.6 to 78.8) | 83.4<br>(83.2 to 83.6) | 6.0<br>(5.6 to 6.4) | 70.1<br>(67.6 to 72.3) | 74.2<br>(71.5 to 76.5) | 5.8<br>(5.5 to 6.0) |
| Saga      | 602.7<br>(592.0 to 613.9) | 410.8<br>(396.9 to 424.0) | -31.9<br>(-34.5 to -29.2) | 78.5<br>(78.3 to 78.7) | 83.3<br>(83.0 to 83.6) | 6.1<br>(5.5 to 6.8) | 69.9<br>(67.4 to 72.1) | 74.0<br>(71.3 to 76.4) | 5.8<br>(5.3 to 6.2) |
| Nagasaki  | 608.5<br>(602.2 to 615.2) | 423.9<br>(414.3 to 433.5) | -30.4<br>(-32.1 to -28.6) | 78.4<br>(78.3 to 78.5) | 82.9<br>(82.7 to 83.1) | 5.7<br>(5.4 to 6.1) | 69.8<br>(67.2 to 72.1) | 73.5<br>(70.8 to 75.9) | 5.3<br>(5.0 to 5.7) |
| Kumamoto  | 568.3<br>(561.9 to 574.6) | 396.7<br>(388.1 to 406.2) | -30.2<br>(-31.9 to -28.3) | 79.3<br>(79.2 to 79.4) | 83.7<br>(83.5 to 83.9) | 5.5<br>(5.2 to 5.9) | 70.6<br>(68.0 to 72.8) | 74.3<br>(71.6 to 76.7) | 5.3<br>(5.0 to 5.6) |
| Ōita      | 585.3<br>(575.8 to 594.8) | 398.3<br>(385.6 to 411.0) | -32.0<br>(-34.3 to -29.5) | 78.9<br>(78.8 to 79.1) | 83.6<br>(83.3 to 83.9) | 6.0<br>(5.3 to 6.5) | 70.2<br>(67.6 to 72.4) | 74.2<br>(71.5 to 76.6) | 5.8<br>(5.4 to 6.2) |
| Miyazaki  | 603.7<br>(597.0 to 610.5) | 418.1<br>(409.2 to 427.9) | -30.7<br>(-32.4 to -29.0) | 78.5<br>(78.4 to 78.6) | 83.0<br>(82.8 to 83.2) | 5.7<br>(5.3 to 6.1) | 69.9<br>(67.4 to 72.2) | 73.8<br>(71.2 to 76.2) | 5.6<br>(5.2 to 5.9) |
| Kagoshima | 606.8<br>(597.3 to 615.9) | 435.2<br>(421.8 to 450.0) | -28.3<br>(-30.6 to -25.9) | 78.4<br>(78.3 to 78.6) | 82.6<br>(82.2 to 82.9) | 5.4<br>(4.6 to 5.9) | 69.9<br>(67.4 to 72.1) | 73.4<br>(70.7 to 75.7) | 5.0<br>(4.5 to 5.4) |
| Okinawa   | 588.6<br>(582.2 to 595.3) | 458.7<br>(447.9 to 469.3) | -22.0<br>(-24.0 to -20.1) | 78.7<br>(78.6 to 78.9) | 81.9<br>(81.7 to 82.2) | 4.1<br>(3.5 to 4.6) | 70.1<br>(67.6 to 72.3) | 72.9<br>(70.2 to 75.2) | 4.0<br>(3.6 to 4.3) |

| B (Men)   | Age-standardize mortality rate<br>(per 100 000) |                           |                             | Life expectancy in years |                        |                             | HALE<br>(healthy life expectancy in years) |                        |                             |
|-----------|-------------------------------------------------|---------------------------|-----------------------------|--------------------------|------------------------|-----------------------------|--------------------------------------------|------------------------|-----------------------------|
|           | 1990                                            | 2015                      | Percent change<br>1990–2015 | 1990                     | 2015                   | Percent change<br>1990–2015 | 1990                                       | 2015                   | Percent change<br>1990–2015 |
|           |                                                 |                           |                             |                          |                        |                             |                                            |                        |                             |
| Japan     | 759.3<br>(757.9 to 760.7)                       | 539.0<br>(536.1 to 542.1) | -29.0<br>(-29.4 to -28.6)   | 75.9<br>(75.9 to 76.0)   | 79.9<br>(79.9 to 80.0) | 5.3<br>(5.1 to 5.4)         | 68.2<br>(65.9 to 70.2)                     | 71.5<br>(69.1 to 73.7) | 5.0<br>(4.8 to 5.1)         |
| Hokkaido  | 772.0<br>(763.2 to 781.7)                       | 542.1<br>(519.8 to 563.3) | -29.8<br>(-32.7 to -26.9)   | 75.6<br>(75.5 to 75.8)   | 79.8<br>(79.4 to 80.2) | 5.6<br>(4.7 to 6.2)         | 68.0<br>(65.8 to 70.0)                     | 71.4<br>(69.1 to 73.6) | 5.1<br>(4.6 to 5.6)         |
| Aomori    | 883.5<br>(872.6 to 894.5)                       | 633.9<br>(615.8 to 652.1) | -28.3<br>(-30.4 to -26.2)   | 73.8<br>(73.7 to 74.0)   | 77.9<br>(77.6 to 78.2) | 5.6<br>(4.9 to 6.1)         | 66.4<br>(64.2 to 68.3)                     | 69.8<br>(67.5 to 71.9) | 5.1<br>(4.7 to 5.6)         |
| Iwate     | 802.9<br>(792.1 to 813.8)                       | 600.9<br>(582.9 to 618.4) | -25.2<br>(-27.6 to -22.6)   | 75.2<br>(75.0 to 75.4)   | 78.5<br>(78.2 to 78.9) | 4.4<br>(3.7 to 5.2)         | 67.5<br>(65.2 to 69.4)                     | 70.3<br>(68.0 to 72.4) | 4.2<br>(3.6 to 4.7)         |
| Miyagi    | 748.8<br>(739.7 to 758.5)                       | 515.1<br>(500.9 to 529.2) | -31.2<br>(-33.2 to -29.1)   | 76.1<br>(76.0 to 76.3)   | 80.5<br>(80.2 to 80.7) | 5.8<br>(5.1 to 6.2)         | 68.3<br>(66.0 to 70.3)                     | 71.9<br>(69.4 to 74.0) | 5.2<br>(4.7 to 5.7)         |
| Akita     | 799.8<br>(788.5 to 810.1)                       | 603.0<br>(585.5 to 621.1) | -24.7<br>(-27.0 to -22.1)   | 75.2<br>(75.0 to 75.4)   | 78.5<br>(78.2 to 78.8) | 4.4<br>(3.7 to 5.1)         | 67.6<br>(65.4 to 69.5)                     | 70.4<br>(68.1 to 72.4) | 4.1<br>(3.7 to 4.6)         |
| Yamagata  | 714.5<br>(704.7 to 724.7)                       | 535.9<br>(519.3 to 551.4) | -25.0<br>(-27.6 to -22.6)   | 76.7<br>(76.6 to 76.9)   | 80.0<br>(79.7 to 80.3) | 4.3<br>(3.6 to 4.8)         | 68.9<br>(66.6 to 70.9)                     | 71.6<br>(69.2 to 73.8) | 4.0<br>(3.6 to 4.5)         |
| Fukushima | 766.9<br>(754.4 to 777.7)                       | 558.4<br>(537.4 to 577.7) | -27.1<br>(-30.0 to -24.4)   | 75.7<br>(75.5 to 75.9)   | 79.5<br>(79.1 to 79.9) | 5.0<br>(4.2 to 5.8)         | 67.8<br>(65.6 to 69.8)                     | 71.1<br>(68.8 to 73.2) | 4.8<br>(4.3 to 5.3)         |
| Ibaraki   | 768.8<br>(761.5 to 775.9)                       | 558.5<br>(544.5 to 571.8) | -27.4<br>(-29.4 to -25.5)   | 75.6<br>(75.5 to 75.7)   | 79.4<br>(79.2 to 79.7) | 5.0<br>(4.6 to 5.6)         | 67.8<br>(65.5 to 69.8)                     | 71.1<br>(68.7 to 73.3) | 4.8<br>(4.5 to 5.2)         |
| Tochigi   | 784.9<br>(774.9 to 794.7)                       | 568.3<br>(553.0 to 584.5) | -27.7<br>(-29.8 to -25.4)   | 75.4<br>(75.3 to 75.6)   | 79.3<br>(79.0 to 79.6) | 5.2<br>(4.5 to 5.7)         | 67.7<br>(65.5 to 69.7)                     | 71.0<br>(68.7 to 73.1) | 4.9<br>(4.4 to 5.3)         |
| Gunma     | 724.4<br>(715.8 to 733.5)                       | 541.6<br>(527.4 to 555.5) | -25.3<br>(-27.4 to -23.1)   | 76.5<br>(76.3 to 76.6)   | 79.9<br>(79.6 to 80.1) | 4.4<br>(3.9 to 5.0)         | 68.1<br>(65.6 to 70.2)                     | 70.9<br>(68.3 to 73.3) | 4.1<br>(3.7 to 4.6)         |
| Saitama   | 752.1<br>(746.1 to 758.3)                       | 542.6<br>(529.6 to 554.5) | -27.8<br>(-29.6 to -26.2)   | 76.3<br>(76.2 to 76.4)   | 79.9<br>(79.7 to 80.1) | 4.7<br>(4.3 to 5.1)         | 68.5<br>(66.3 to 70.5)                     | 71.6<br>(69.2 to 73.7) | 4.4<br>(4.1 to 4.7)         |
| Chiba     | 742.1<br>(736.4 to 748.0)                       | 533.0<br>(522.6 to 544.8) | -28.2<br>(-29.6 to -26.6)   | 76.3<br>(76.3 to 76.4)   | 80.1<br>(79.9 to 80.3) | 5.0<br>(4.6 to 5.2)         | 68.5<br>(66.2 to 70.5)                     | 71.6<br>(69.2 to 73.8) | 4.5<br>(4.2 to 4.8)         |
| Tokyo     | 748.3<br>(743.3 to 753.5)                       | 526.6<br>(513.8 to 539.6) | -29.6<br>(-31.3 to -28.0)   | 76.2<br>(76.1 to 76.3)   | 80.3<br>(80.1 to 80.5) | 5.4<br>(5.0 to 5.8)         | 68.4<br>(66.1 to 70.4)                     | 71.9<br>(69.4 to 74.1) | 5.1<br>(4.8 to 5.4)         |
| Kanagawa  | 730.3<br>(725.4 to 736.0)                       | 520.4<br>(508.9 to 531.9) | -28.7<br>(-30.3 to -27.1)   | 76.5<br>(76.4 to 76.6)   | 80.4<br>(80.2 to 80.6) | 5.1<br>(4.7 to 5.5)         | 68.7<br>(66.5 to 70.7)                     | 72.0<br>(69.7 to 74.2) | 4.8<br>(4.5 to 5.1)         |
| Niigata   | 718.8<br>(706.0 to 730.5)                       | 532.1<br>(510.0 to 555.6) | -26.0<br>(-29.3 to -22.4)   | 76.7<br>(76.5 to 76.9)   | 80.1<br>(79.7 to 80.5) | 4.4<br>(3.6 to 5.2)         | 68.6<br>(66.3 to 70.7)                     | 71.5<br>(69.0 to 73.7) | 4.1<br>(3.5 to 4.7)         |
| Toyama    | 730.2<br>(720.9 to 740.5)                       | 527.6<br>(512.9 to 544.9) | -27.7<br>(-30.0 to -25.2)   | 76.3<br>(76.2 to 76.5)   | 80.2<br>(79.8 to 80.4) | 5.1<br>(4.3 to 5.5)         | 68.4<br>(66.1 to 70.4)                     | 71.7<br>(69.3 to 73.8) | 4.7<br>(4.3 to 5.1)         |
| Ishikawa  | 703.7<br>(693.5 to 713.3)                       | 505.2<br>(490.8 to 519.3) | -28.2<br>(-30.7 to -25.8)   | 76.9<br>(76.7 to 77.1)   | 80.7<br>(80.4 to 81.0) | 4.9<br>(4.3 to 5.6)         | 69.0<br>(66.7 to 71.0)                     | 72.2<br>(69.7 to 74.4) | 4.7<br>(4.2 to 5.1)         |
| Fukui     | 680.8<br>(670.7 to 692.4)                       | 494.5<br>(477.8 to 511.1) | -27.3<br>(-30.1 to -24.7)   | 77.3<br>(77.1 to 77.5)   | 81.0<br>(80.7 to 81.3) | 4.8<br>(4.1 to 5.4)         | 69.3<br>(67.1 to 71.4)                     | 72.5<br>(70.0 to 74.7) | 4.5<br>(4.1 to 5.0)         |
| Yamanashi | 776.6<br>(758.0 to 796.9)                       | 535.1<br>(510.9 to 562.7) | -31.0<br>(-34.8 to -27.3)   | 75.6<br>(75.3 to 75.8)   | 80.0<br>(79.5 to 80.5) | 5.8<br>(4.9 to 6.9)         | 67.8<br>(65.6 to 69.9)                     | 71.6<br>(69.3 to 73.8) | 5.6<br>(5.0 to 6.3)         |
| Nagano    | 657.5<br>(645.7 to 669.1)                       | 485.5<br>(463.1 to 506.9) | -26.2<br>(-29.5 to -22.5)   | 77.7<br>(77.6 to 77.9)   | 81.2<br>(80.8 to 81.6) | 4.5<br>(3.7 to 5.2)         | 69.7<br>(67.3 to 71.8)                     | 72.6<br>(70.2 to 74.9) | 4.2<br>(3.6 to 4.8)         |
| Gifu      | 693.2<br>(679.6 to 707.2)                       | 516.8<br>(496.8 to 539.0) | -25.5<br>(-29.0 to -21.8)   | 77.1<br>(76.9 to 77.3)   | 80.4<br>(80.0 to 80.8) | 4.3<br>(3.5 to 5.1)         | 68.8<br>(66.3 to 70.9)                     | 71.6<br>(69.1 to 73.9) | 4.2<br>(3.6 to 4.8)         |
| Shizuoka  | 725.7<br>(719.4 to 732.1)                       | 525.5<br>(513.0 to 538.0) | -27.6<br>(-29.4 to -25.6)   | 76.5<br>(76.4 to 76.6)   | 80.3<br>(80.0 to 80.5) | 5.0<br>(4.4 to 5.4)         | 68.6<br>(66.4 to 70.7)                     | 71.8<br>(69.4 to 74.0) | 4.6<br>(4.2 to 4.9)         |
| Aichi     | 748.4<br>(742.5 to 754.1)                       | 532.6<br>(521.0 to 543.8) | -28.9<br>(-30.4 to -27.2)   | 76.3<br>(76.2 to 76.4)   | 80.1<br>(79.9 to 80.3) | 5.0<br>(4.6 to 5.4)         | 68.6<br>(66.3 to 70.5)                     | 71.7<br>(69.3 to 73.9) | 4.6<br>(4.3 to 4.9)         |
| Mie       | 726.3<br>(717.5 to 735.2)                       | 518.9<br>(505.9 to 533.1) | -28.6<br>(-30.6 to -26.3)   | 76.4<br>(76.3 to 76.6)   | 80.3<br>(80.1 to 80.6) | 5.1<br>(4.6 to 5.6)         | 68.6<br>(66.3 to 70.6)                     | 71.9<br>(69.5 to 74.0) | 4.8<br>(4.4 to 5.2)         |
| Shiga     | 680.2<br>(666.8 to 695.4)                       | 467.6<br>(448.2 to 490.1) | -31.2<br>(-34.3 to -27.7)   | 77.3<br>(77.1 to 77.5)   | 81.7<br>(81.2 to 82.0) | 5.7<br>(4.8 to 6.4)         | 69.3<br>(67.0 to 71.4)                     | 73.0<br>(70.5 to 75.2) | 5.3<br>(4.7 to 5.9)         |

|           |                           |                           |                           |                        |                        |                     |                        |                        |                     |
|-----------|---------------------------|---------------------------|---------------------------|------------------------|------------------------|---------------------|------------------------|------------------------|---------------------|
| Kyoto     | 714.8<br>(706.9 to 722.9) | 509.8<br>(495.1 to 526.0) | -28.7<br>(-30.8 to -26.4) | 76.7<br>(76.5 to 76.8) | 80.6<br>(80.3 to 80.9) | 5.1<br>(4.6 to 5.8) | 68.8<br>(66.5 to 70.8) | 72.2<br>(69.7 to 74.3) | 4.9<br>(4.4 to 5.3) |
| Osaka     | 829.6<br>(822.7 to 836.2) | 572.7<br>(555.1 to 589.5) | -31.0<br>(-33.3 to -28.8) | 74.9<br>(74.8 to 75.0) | 79.2<br>(78.9 to 79.5) | 5.7<br>(5.2 to 6.3) | 67.4<br>(65.2 to 69.3) | 71.0<br>(68.7 to 73.1) | 5.4<br>(5.0 to 5.9) |
| Hyogo     | 788.1<br>(781.2 to 795.0) | 536.0<br>(522.6 to 550.4) | -32.0<br>(-33.7 to -29.9) | 75.5<br>(75.4 to 75.6) | 80.0<br>(79.8 to 80.3) | 6.0<br>(5.6 to 6.5) | 67.7<br>(65.5 to 69.7) | 71.6<br>(69.1 to 73.7) | 5.7<br>(5.2 to 6.0) |
| Nara      | 710.5<br>(700.8 to 719.2) | 497.3<br>(482.5 to 512.0) | -30.0<br>(-32.2 to -27.6) | 76.8<br>(76.6 to 76.9) | 80.9<br>(80.6 to 81.2) | 5.3<br>(4.8 to 6.0) | 68.8<br>(66.6 to 70.9) | 72.3<br>(69.9 to 74.5) | 5.1<br>(4.6 to 5.5) |
| Wakayama  | 829.4<br>(813.9 to 844.1) | 555.0<br>(533.6 to 578.0) | -33.2<br>(-35.8 to -30.0) | 74.8<br>(74.6 to 75.0) | 79.6<br>(79.2 to 80.0) | 6.4<br>(5.6 to 7.2) | 67.2<br>(64.9 to 69.1) | 71.2<br>(68.8 to 73.4) | 6.1<br>(5.5 to 6.6) |
| Tottori   | 802.9<br>(782.2 to 824.9) | 575.3<br>(548.9 to 600.3) | -28.4<br>(-32.1 to -24.6) | 75.2<br>(74.9 to 75.5) | 79.1<br>(78.6 to 79.6) | 5.2<br>(4.1 to 6.3) | 67.5<br>(65.3 to 69.5) | 70.9<br>(68.5 to 73.0) | 5.0<br>(4.3 to 5.6) |
| Shimane   | 773.3<br>(753.3 to 794.1) | 553.7<br>(526.7 to 581.1) | -28.4<br>(-32.1 to -24.4) | 75.6<br>(75.3 to 75.9) | 79.6<br>(79.1 to 80.1) | 5.3<br>(4.2 to 6.4) | 68.0<br>(65.7 to 69.9) | 71.4<br>(69.1 to 73.5) | 5.1<br>(4.4 to 5.8) |
| Okayama   | 745.7<br>(736.0 to 754.6) | 528.0<br>(513.8 to 543.5) | -29.2<br>(-31.3 to -26.9) | 76.1<br>(75.9 to 76.3) | 80.2<br>(79.9 to 80.4) | 5.4<br>(4.7 to 5.9) | 68.3<br>(66.0 to 70.3) | 71.8<br>(69.3 to 73.9) | 5.1<br>(4.7 to 5.5) |
| Hiroshima | 747.9<br>(740.5 to 755.2) | 533.5<br>(521.1 to 546.7) | -28.7<br>(-30.4 to -26.9) | 76.0<br>(75.9 to 76.1) | 80.1<br>(79.8 to 80.3) | 5.4<br>(4.9 to 5.8) | 68.2<br>(66.0 to 70.2) | 71.7<br>(69.4 to 73.8) | 5.1<br>(4.7 to 5.4) |
| Yamaguchi | 795.2<br>(785.3 to 805.3) | 551.4<br>(534.4 to 567.4) | -30.6<br>(-33.1 to -28.5) | 75.3<br>(75.1 to 75.4) | 79.6<br>(79.3 to 80.0) | 5.7<br>(5.2 to 6.5) | 67.6<br>(65.5 to 69.6) | 71.4<br>(69.0 to 73.5) | 5.6<br>(5.2 to 6.0) |
| Tokushima | 797.5<br>(778.9 to 816.0) | 568.8<br>(543.5 to 595.7) | -28.7<br>(-32.4 to -24.6) | 75.2<br>(75.0 to 75.5) | 79.2<br>(78.7 to 79.6) | 5.3<br>(4.2 to 6.1) | 67.5<br>(65.2 to 69.5) | 70.8<br>(68.4 to 72.9) | 4.9<br>(4.2 to 5.6) |
| Kagawa    | 748.9<br>(738.2 to 759.7) | 546.4<br>(530.4 to 563.5) | -27.0<br>(-29.3 to -24.4) | 76.1<br>(75.9 to 76.2) | 79.7<br>(79.4 to 80.0) | 4.7<br>(4.2 to 5.4) | 68.3<br>(66.0 to 70.3) | 71.3<br>(68.9 to 73.6) | 4.5<br>(4.0 to 5.0) |
| Ehime     | 790.9<br>(774.4 to 808.2) | 581.3<br>(557.3 to 607.9) | -26.5<br>(-29.8 to -22.9) | 75.4<br>(75.1 to 75.6) | 79.0<br>(78.5 to 79.4) | 4.8<br>(3.8 to 5.7) | 67.6<br>(65.4 to 69.6) | 70.7<br>(68.3 to 72.9) | 4.6<br>(3.9 to 5.2) |
| Kochi     | 850.9<br>(838.0 to 863.2) | 593.7<br>(574.7 to 612.5) | -30.2<br>(-32.6 to -27.9) | 74.3<br>(74.2 to 74.5) | 78.7<br>(78.4 to 79.0) | 5.9<br>(5.2 to 6.5) | 66.6<br>(64.3 to 68.6) | 70.3<br>(67.9 to 72.4) | 5.6<br>(5.1 to 6.0) |
| Fukuoka   | 799.7<br>(793.2 to 806.8) | 535.7<br>(522.4 to 549.8) | -33.1<br>(-34.7 to -31.1) | 75.2<br>(75.0 to 75.3) | 80.0<br>(79.7 to 80.2) | 6.4<br>(5.8 to 6.9) | 67.6<br>(65.4 to 69.5) | 71.6<br>(69.3 to 73.8) | 6.0<br>(5.6 to 6.4) |
| Saga      | 797.8<br>(779.4 to 816.1) | 548.0<br>(524.2 to 574.2) | -31.5<br>(-34.7 to -27.5) | 75.2<br>(75.0 to 75.5) | 79.7<br>(79.2 to 80.2) | 6.0<br>(4.9 to 6.9) | 67.5<br>(65.3 to 69.5) | 71.3<br>(68.9 to 73.5) | 5.6<br>(4.9 to 6.3) |
| Nagasaki  | 810.7<br>(799.7 to 822.5) | 564.1<br>(547.5 to 580.6) | -30.4<br>(-32.8 to -28.0) | 75.1<br>(74.9 to 75.2) | 79.3<br>(79.0 to 79.6) | 5.6<br>(5.1 to 6.3) | 67.3<br>(65.0 to 69.3) | 70.8<br>(68.4 to 72.9) | 5.3<br>(4.8 to 5.8) |
| Kumamoto  | 760.7<br>(749.3 to 770.7) | 513.9<br>(497.6 to 530.9) | -32.5<br>(-34.8 to -30.2) | 75.8<br>(75.7 to 76.0) | 80.5<br>(80.2 to 80.8) | 6.2<br>(5.5 to 6.7) | 68.0<br>(65.7 to 70.0) | 71.9<br>(69.5 to 74.1) | 5.8<br>(5.3 to 6.2) |
| Ōita      | 770.4<br>(753.7 to 787.4) | 533.0<br>(507.8 to 558.0) | -30.9<br>(-34.1 to -27.4) | 75.7<br>(75.5 to 75.9) | 80.0<br>(79.6 to 80.5) | 5.7<br>(4.9 to 6.6) | 67.9<br>(65.6 to 69.9) | 71.6<br>(69.1 to 73.7) | 5.4<br>(4.8 to 6.1) |
| Miyazaki  | 804.2<br>(793.8 to 815.1) | 559.2<br>(542.5 to 575.4) | -30.4<br>(-32.8 to -28.2) | 75.1<br>(74.9 to 75.2) | 79.4<br>(79.1 to 79.7) | 5.7<br>(5.2 to 6.4) | 67.4<br>(65.1 to 69.3) | 71.0<br>(68.7 to 73.2) | 5.4<br>(5.0 to 5.9) |
| Kagoshima | 802.0<br>(787.6 to 818.5) | 582.7<br>(558.9 to 609.3) | -27.5<br>(-30.5 to -23.8) | 75.2<br>(74.9 to 75.4) | 78.9<br>(78.5 to 79.3) | 4.9<br>(4.1 to 5.9) | 67.4<br>(65.1 to 69.4) | 70.5<br>(68.1 to 72.7) | 4.6<br>(4.0 to 5.2) |
| Okinawa   | 795.0<br>(784.1 to 806.3) | 616.8<br>(599.2 to 635.0) | -22.4<br>(-24.9 to -19.8) | 75.2<br>(75.0 to 75.4) | 78.2<br>(77.9 to 78.5) | 4.0<br>(3.3 to 4.7) | 67.5<br>(65.2 to 69.4) | 70.1<br>(67.7 to 72.2) | 3.8<br>(3.4 to 4.3) |

| C (Women) | Age-standardized mortality rate<br>(per 100 000) |                           |                             | Life expectancy in years  |                        |                             | HALE<br>(healthy life expectancy in years) |                        |                             |
|-----------|--------------------------------------------------|---------------------------|-----------------------------|---------------------------|------------------------|-----------------------------|--------------------------------------------|------------------------|-----------------------------|
|           | 1990                                             | 2015                      | Percent change<br>1990–2015 | 1990                      | 2015                   | Percent change<br>1990–2015 | 1990                                       | 2015                   | Percent change<br>1990–2015 |
|           | Japan                                            | 455.5<br>(454.3 to 456.6) | 315.0<br>(313.2 to 316.6)   | -30.8<br>(-31.3 to -30.4) | 81.8<br>(81.8 to 81.9) | 86.3<br>(86.3 to 86.4)      | 5.5<br>(5.4 to 5.6)                        | 72.4<br>(69.6 to 74.8) | 76.3<br>(73.3 to 78.9)      |
| Hokkaido  | 462.4<br>(455.4 to 469.8)                        | 320.5<br>(308.3 to 332.3) | -30.7<br>(-33.5 to -28.1)   | 81.7<br>(81.5 to 81.8)    | 86.2<br>(85.9 to 86.5) | 5.5<br>(5.0 to 6.1)         | 72.3<br>(69.6 to 74.8)                     | 76.2<br>(73.2 to 78.8) | 5.4<br>(5.0 to 5.8)         |
| Aomori    | 471.0<br>(463.0 to 479.0)                        | 350.0<br>(337.6 to 361.6) | -25.6<br>(-28.6 to -22.9)   | 81.4<br>(81.2 to 81.6)    | 85.1<br>(84.8 to 85.4) | 4.5<br>(3.9 to 5.2)         | 72.0<br>(69.2 to 74.4)                     | 75.2<br>(72.3 to 77.7) | 4.4<br>(4.0 to 4.8)         |
| Iwate     | 455.6<br>(447.7 to 463.2)                        | 318.0<br>(307.5 to 329.1) | -30.2<br>(-32.9 to -27.4)   | 81.8<br>(81.7 to 82.0)    | 86.2<br>(85.9 to 86.5) | 5.4<br>(4.8 to 5.9)         | 72.4<br>(69.7 to 74.8)                     | 76.1<br>(73.2 to 78.6) | 5.1<br>(4.0 to 5.8)         |
| Miyagi    | 445.0<br>(437.7 to 452.3)                        | 303.4<br>(293.1 to 313.1) | -31.8<br>(-34.3 to -29.3)   | 82.1<br>(82.0 to 82.3)    | 86.8<br>(86.5 to 87.0) | 5.7<br>(5.1 to 6.1)         | 72.5<br>(69.7 to 75.0)                     | 76.4<br>(73.4 to 79.0) | 5.3<br>(4.3 to 6.0)         |
| Akita     | 443.5<br>(436.1 to 451.5)                        | 326.9<br>(316.7 to 338.7) | -26.3<br>(-28.9 to -23.4)   | 82.1<br>(82.0 to 82.3)    | 85.9<br>(85.6 to 86.2) | 4.6<br>(4.0 to 5.1)         | 72.7<br>(69.9 to 75.1)                     | 75.9<br>(73.0 to 78.5) | 4.4<br>(4.0 to 4.8)         |
| Yamagata  | 420.9<br>(413.8 to 429.3)                        | 311.6<br>(300.5 to 322.9) | -25.9<br>(-29.1 to -23.1)   | 82.8<br>(82.6 to 82.9)    | 86.5<br>(86.2 to 86.7) | 4.5<br>(4.0 to 5.0)         | 73.2<br>(70.4 to 75.7)                     | 76.3<br>(73.4 to 78.9) | 4.2<br>(3.8 to 4.6)         |
| Fukushima | 452.1<br>(443.3 to 461.4)                        | 315.9<br>(304.0 to 328.4) | -30.1<br>(-33.0 to -27.2)   | 81.9<br>(81.7 to 82.1)    | 86.3<br>(86.0 to 86.6) | 5.4<br>(4.8 to 6.0)         | 72.4<br>(69.7 to 74.9)                     | 76.2<br>(73.3 to 78.8) | 5.3<br>(4.9 to 5.8)         |
| Ibaraki   | 463.9<br>(458.5 to 470.1)                        | 322.5<br>(313.8 to 331.4) | -30.4<br>(-32.7 to -28.5)   | 81.6<br>(81.5 to 81.7)    | 86.0<br>(85.8 to 86.3) | 5.4<br>(5.0 to 5.9)         | 72.2<br>(69.4 to 74.6)                     | 76.0<br>(73.2 to 78.6) | 5.3<br>(5.0 to 5.7)         |
| Tochigi   | 478.9<br>(471.3 to 486.3)                        | 312.7<br>(303.0 to 322.2) | -34.7<br>(-37.0 to -32.4)   | 81.2<br>(81.1 to 81.4)    | 86.4<br>(86.2 to 86.7) | 6.4<br>(5.9 to 6.9)         | 71.9<br>(69.2 to 74.4)                     | 76.4<br>(73.5 to 79.0) | 6.2<br>(5.8 to 6.6)         |
| Gunma     | 458.5<br>(451.6 to 465.5)                        | 320.7<br>(311.5 to 331.0) | -30.1<br>(-32.3 to -27.7)   | 81.8<br>(81.6 to 81.9)    | 86.1<br>(85.9 to 86.4) | 5.3<br>(4.9 to 5.9)         | 72.2<br>(69.5 to 74.7)                     | 76.1<br>(73.2 to 78.7) | 5.3<br>(4.9 to 5.7)         |
| Saitama   | 468.9<br>(463.7 to 473.8)                        | 330.1<br>(322.3 to 338.5) | -29.6<br>(-31.5 to -27.6)   | 81.6<br>(81.5 to 81.7)    | 85.8<br>(85.6 to 86.0) | 5.1<br>(4.8 to 5.5)         | 72.2<br>(69.4 to 74.6)                     | 75.8<br>(72.9 to 78.4) | 5.0<br>(4.7 to 5.3)         |
| Chiba     | 450.2<br>(445.6 to 454.7)                        | 316.3<br>(309.4 to 324.2) | -29.8<br>(-31.6 to -27.9)   | 82.0<br>(81.9 to 82.1)    | 86.3<br>(86.1 to 86.5) | 5.2<br>(4.9 to 5.6)         | 72.5<br>(69.8 to 75.0)                     | 76.3<br>(73.3 to 78.7) | 5.1<br>(4.8 to 5.4)         |
| Tokyo     | 456.4<br>(452.3 to 460.9)                        | 316.6<br>(308.4 to 325.1) | -30.7<br>(-32.5 to -28.6)   | 81.8<br>(81.8 to 81.9)    | 86.3<br>(86.1 to 86.5) | 5.5<br>(5.1 to 5.7)         | 72.5<br>(69.8 to 75.0)                     | 76.4<br>(73.5 to 78.9) | 5.3<br>(5.0 to 5.7)         |
| Kanagawa  | 447.0<br>(442.6 to 451.2)                        | 312.9<br>(304.9 to 320.4) | -30.0<br>(-31.9 to -28.2)   | 82.1<br>(82.0 to 82.2)    | 86.4<br>(86.2 to 86.6) | 5.2<br>(4.9 to 5.6)         | 72.7<br>(69.9 to 75.1)                     | 76.4<br>(73.4 to 79.0) | 5.1<br>(4.8 to 5.4)         |
| Niigata   | 424.7<br>(415.5 to 433.6)                        | 303.2<br>(291.0 to 316.8) | -28.7<br>(-31.8 to -25.0)   | 82.7<br>(82.5 to 82.9)    | 86.8<br>(86.5 to 87.1) | 5.0<br>(4.3 to 5.6)         | 72.8<br>(69.9 to 75.3)                     | 76.1<br>(72.9 to 78.9) | 4.6<br>(4.1 to 5.1)         |
| Toyama    | 440.5<br>(431.9 to 448.8)                        | 304.1<br>(294.1 to 315.7) | -30.9<br>(-33.5 to -28.0)   | 82.2<br>(82.0 to 82.4)    | 86.7<br>(86.5 to 87.0) | 5.5<br>(5.0 to 6.1)         | 72.5<br>(69.7 to 75.0)                     | 76.4<br>(73.4 to 79.1) | 5.4<br>(4.9 to 5.8)         |
| Ishikawa  | 426.2<br>(419.0 to 433.9)                        | 302.8<br>(293.6 to 312.9) | -28.9<br>(-31.6 to -26.4)   | 82.6<br>(82.5 to 82.8)    | 86.8<br>(86.5 to 87.0) | 5.1<br>(4.5 to 5.5)         | 73.0<br>(70.2 to 75.5)                     | 76.6<br>(73.6 to 79.2) | 5.0<br>(4.6 to 5.3)         |
| Fukui     | 427.2<br>(418.6 to 436.8)                        | 291.0<br>(281.4 to 300.8) | -31.9<br>(-34.6 to -29.1)   | 82.6<br>(82.4 to 82.7)    | 87.3<br>(87.0 to 87.5) | 5.7<br>(5.2 to 6.2)         | 72.9<br>(70.1 to 75.4)                     | 77.0<br>(74.0 to 79.7) | 5.5<br>(5.1 to 5.9)         |
| Yamanashi | 449.6<br>(436.6 to 461.3)                        | 303.3<br>(289.1 to 318.1) | -32.6<br>(-35.9 to -28.2)   | 82.0<br>(81.7 to 82.2)    | 86.8<br>(86.4 to 87.2) | 5.9<br>(5.1 to 6.7)         | 72.6<br>(69.9 to 75.0)                     | 76.8<br>(73.9 to 79.3) | 5.8<br>(5.2 to 6.3)         |
| Nagano    | 429.8<br>(420.2 to 439.6)                        | 294.0<br>(281.7 to 307.1) | -31.6<br>(-35.0 to -28.2)   | 82.5<br>(82.3 to 82.7)    | 87.1<br>(86.8 to 87.5) | 5.6<br>(5.0 to 6.3)         | 73.1<br>(70.3 to 75.4)                     | 77.1<br>(74.1 to 79.6) | 5.4<br>(4.9 to 6.0)         |
| Gifu      | 460.9<br>(450.8 to 471.3)                        | 319.9<br>(307.6 to 333.9) | -30.7<br>(-33.6 to -27.2)   | 81.7<br>(81.5 to 81.9)    | 86.2<br>(85.8 to 86.5) | 5.5<br>(4.8 to 6.1)         | 72.4<br>(69.6 to 74.8)                     | 76.2<br>(73.3 to 78.8) | 5.3<br>(4.8 to 5.8)         |
| Shizuoka  | 436.1<br>(431.4 to 441.4)                        | 312.1<br>(304.3 to 319.8) | -28.4<br>(-30.3 to -26.5)   | 82.3<br>(82.2 to 82.4)    | 86.4<br>(86.3 to 86.6) | 5.0<br>(4.7 to 5.4)         | 72.8<br>(70.0 to 75.2)                     | 76.3<br>(73.3 to 78.9) | 4.8<br>(4.5 to 5.1)         |
| Aichi     | 469.4<br>(464.3 to 474.2)                        | 320.1<br>(312.6 to 328.4) | -31.8<br>(-33.5 to -29.9)   | 81.5<br>(81.5 to 81.6)    | 86.1<br>(85.9 to 86.3) | 5.6<br>(5.3 to 5.9)         | 72.1<br>(69.4 to 74.6)                     | 76.1<br>(73.1 to 78.6) | 5.5<br>(5.2 to 5.8)         |
| Mie       | 444.4<br>(437.1 to 451.0)                        | 299.4<br>(291.3 to 308.1) | -32.6<br>(-34.7 to -30.2)   | 82.1<br>(82.0 to 82.2)    | 86.9<br>(86.7 to 87.2) | 5.8<br>(5.5 to 6.3)         | 72.6<br>(69.7 to 75.0)                     | 76.7<br>(73.7 to 79.4) | 5.7<br>(5.4 to 6.1)         |
| Shiga     | 439.2<br>(428.5 to 453.2)                        | 280.4<br>(267.9 to 292.7) | -36.2<br>(-39.5 to -32.8)   | 82.2<br>(82.0 to 82.5)    | 87.7<br>(87.4 to 88.0) | 6.7<br>(5.9 to 7.3)         | 72.8<br>(70.0 to 75.2)                     | 77.5<br>(74.5 to 80.1) | 6.4<br>(5.9 to 7.0)         |

|           |                           |                           |                           |                        |                        |                     |                        |                        |                     |
|-----------|---------------------------|---------------------------|---------------------------|------------------------|------------------------|---------------------|------------------------|------------------------|---------------------|
| Kyoto     | 448.0<br>(441.5 to 454.2) | 298.4<br>(289.5 to 307.5) | -33.4<br>(-35.5 to -31.1) | 82.0<br>(81.9 to 82.1) | 87.0<br>(86.7 to 87.2) | 6.1<br>(5.6 to 6.5) | 72.7<br>(69.8 to 75.1) | 76.9<br>(73.9 to 79.5) | 5.9<br>(5.5 to 6.2) |
| Osaka     | 492.7<br>(487.2 to 498.4) | 333.5<br>(323.4 to 344.1) | -32.3<br>(-34.4 to -30.1) | 81.0<br>(80.9 to 81.1) | 85.7<br>(85.4 to 85.9) | 5.8<br>(5.3 to 6.2) | 71.7<br>(69.0 to 74.1) | 75.8<br>(73.0 to 78.3) | 5.7<br>(5.4 to 6.1) |
| Hyogo     | 470.8<br>(465.5 to 476.2) | 316.1<br>(307.7 to 324.4) | -32.9<br>(-34.9 to -30.8) | 81.5<br>(81.4 to 81.6) | 86.3<br>(86.1 to 86.5) | 5.9<br>(5.5 to 6.3) | 71.9<br>(69.1 to 74.4) | 76.0<br>(73.0 to 78.6) | 5.6<br>(4.7 to 6.1) |
| Nara      | 447.0<br>(439.9 to 454.3) | 291.8<br>(282.5 to 301.1) | -34.8<br>(-36.9 to -32.2) | 82.1<br>(81.9 to 82.2) | 87.2<br>(87.0 to 87.5) | 6.2<br>(5.8 to 6.8) | 72.6<br>(69.8 to 75.1) | 77.0<br>(74.1 to 79.7) | 6.1<br>(5.7 to 6.5) |
| Wakayama  | 470.5<br>(458.9 to 482.0) | 323.0<br>(309.6 to 339.4) | -31.5<br>(-34.5 to -27.6) | 81.4<br>(81.2 to 81.7) | 86.1<br>(85.6 to 86.4) | 5.8<br>(4.8 to 6.4) | 72.1<br>(69.3 to 74.5) | 76.1<br>(73.1 to 78.7) | 5.6<br>(5.0 to 6.1) |
| Tottori   | 453.7<br>(439.4 to 468.2) | 313.5<br>(300.3 to 329.2) | -30.9<br>(-34.5 to -27.0) | 81.9<br>(81.6 to 82.2) | 86.4<br>(86.0 to 86.8) | 5.5<br>(4.6 to 6.4) | 72.5<br>(69.7 to 74.9) | 76.3<br>(73.4 to 78.9) | 5.3<br>(4.8 to 5.9) |
| Shimane   | 440.0<br>(427.8 to 453.7) | 298.0<br>(283.3 to 313.4) | -32.2<br>(-36.2 to -28.4) | 82.2<br>(81.9 to 82.5) | 87.0<br>(86.6 to 87.4) | 5.8<br>(5.0 to 6.7) | 72.8<br>(70.0 to 75.2) | 76.8<br>(73.8 to 79.5) | 5.6<br>(5.0 to 6.2) |
| Okayama   | 437.1<br>(429.9 to 445.1) | 298.0<br>(287.7 to 307.3) | -31.8<br>(-34.5 to -29.6) | 82.3<br>(82.1 to 82.4) | 87.0<br>(86.7 to 87.3) | 5.7<br>(5.2 to 6.3) | 72.8<br>(70.1 to 75.3) | 76.9<br>(74.0 to 79.6) | 5.6<br>(5.3 to 6.0) |
| Hiroshima | 438.7<br>(432.8 to 444.3) | 307.4<br>(299.4 to 316.4) | -29.9<br>(-31.9 to -27.6) | 82.2<br>(82.1 to 82.4) | 86.6<br>(86.4 to 86.8) | 5.4<br>(4.9 to 5.7) | 72.8<br>(70.0 to 75.2) | 76.6<br>(73.7 to 79.2) | 5.3<br>(4.9 to 5.6) |
| Yamaguchi | 459.8<br>(452.0 to 466.7) | 315.1<br>(305.1 to 324.6) | -31.5<br>(-33.9 to -29.1) | 81.7<br>(81.6 to 81.9) | 86.3<br>(86.1 to 86.6) | 5.6<br>(5.1 to 6.1) | 72.3<br>(69.5 to 74.7) | 76.3<br>(73.2 to 78.8) | 5.5<br>(5.1 to 5.9) |
| Tokushima | 472.4<br>(458.4 to 486.7) | 312.4<br>(297.8 to 325.9) | -33.9<br>(-37.5 to -30.3) | 81.4<br>(81.1 to 81.7) | 86.4<br>(86.0 to 86.8) | 6.1<br>(5.3 to 7.0) | 71.8<br>(69.0 to 74.3) | 76.2<br>(73.1 to 78.8) | 6.0<br>(5.5 to 6.6) |
| Kagawa    | 451.5<br>(443.1 to 460.2) | 311.8<br>(301.8 to 321.9) | -31.0<br>(-33.5 to -28.2) | 81.9<br>(81.8 to 82.1) | 86.5<br>(86.2 to 86.7) | 5.6<br>(5.0 to 6.0) | 72.4<br>(69.6 to 74.9) | 76.3<br>(73.4 to 79.0) | 5.4<br>(5.0 to 5.8) |
| Ehime     | 462.4<br>(450.2 to 474.3) | 321.8<br>(308.1 to 336.8) | -30.4<br>(-33.8 to -27.0) | 81.6<br>(81.4 to 81.9) | 86.1<br>(85.8 to 86.5) | 5.5<br>(4.8 to 6.3) | 72.2<br>(69.4 to 74.6) | 76.0<br>(73.0 to 78.7) | 5.3<br>(4.8 to 5.8) |
| Kochi     | 470.0<br>(461.2 to 478.8) | 322.2<br>(310.0 to 333.2) | -31.4<br>(-34.2 to -28.4) | 81.4<br>(81.2 to 81.6) | 86.1<br>(85.8 to 86.4) | 5.8<br>(5.1 to 6.4) | 71.6<br>(68.7 to 74.1) | 75.6<br>(72.4 to 78.3) | 5.6<br>(5.1 to 6.0) |
| Fukuoka   | 451.3<br>(445.7 to 456.4) | 310.0<br>(302.3 to 318.4) | -31.3<br>(-33.2 to -29.2) | 81.9<br>(81.8 to 82.0) | 86.5<br>(86.3 to 86.7) | 5.6<br>(5.2 to 6.0) | 72.5<br>(69.7 to 74.9) | 76.5<br>(73.5 to 79.1) | 5.5<br>(5.1 to 5.8) |
| Saga      | 468.2<br>(454.0 to 481.3) | 307.4<br>(293.8 to 322.3) | -34.4<br>(-37.6 to -30.8) | 81.5<br>(81.2 to 81.8) | 86.6<br>(86.2 to 87.0) | 6.3<br>(5.4 to 7.1) | 72.1<br>(69.3 to 74.5) | 76.5<br>(73.5 to 79.1) | 6.1<br>(5.6 to 6.7) |
| Nagasaki  | 469.7<br>(462.0 to 477.6) | 319.4<br>(309.2 to 330.0) | -32.0<br>(-34.4 to -29.4) | 81.5<br>(81.3 to 81.6) | 86.2<br>(85.9 to 86.4) | 5.8<br>(5.3 to 6.3) | 72.0<br>(69.2 to 74.5) | 76.0<br>(73.0 to 78.6) | 5.5<br>(5.1 to 5.9) |
| Kumamoto  | 434.1<br>(426.5 to 442.1) | 308.0<br>(297.3 to 318.9) | -29.1<br>(-31.6 to -26.0) | 82.4<br>(82.2 to 82.5) | 86.6<br>(86.3 to 86.9) | 5.1<br>(4.6 to 5.7) | 72.8<br>(70.1 to 75.3) | 76.5<br>(73.5 to 79.0) | 5.0<br>(4.5 to 5.4) |
| Ōita      | 453.3<br>(441.7 to 465.1) | 295.6<br>(283.0 to 308.7) | -34.8<br>(-38.2 to -31.2) | 81.9<br>(81.6 to 82.1) | 87.1<br>(86.7 to 87.4) | 6.3<br>(5.6 to 7.1) | 72.3<br>(69.5 to 74.8) | 76.8<br>(73.8 to 79.5) | 6.2<br>(5.7 to 6.8) |
| Miyazaki  | 464.2<br>(456.4 to 471.9) | 310.0<br>(300.4 to 320.0) | -33.2<br>(-35.6 to -30.8) | 81.6<br>(81.4 to 81.7) | 86.5<br>(86.3 to 86.8) | 6.0<br>(5.6 to 6.6) | 72.3<br>(69.5 to 74.7) | 76.5<br>(73.7 to 79.1) | 5.9<br>(5.5 to 6.3) |
| Kagoshima | 473.5<br>(461.7 to 485.2) | 321.9<br>(306.9 to 337.1) | -32.0<br>(-35.4 to -28.5) | 81.4<br>(81.1 to 81.6) | 86.1<br>(85.7 to 86.5) | 5.8<br>(5.0 to 6.7) | 72.1<br>(69.4 to 74.4) | 76.1<br>(73.2 to 78.7) | 5.6<br>(5.1 to 6.2) |
| Okinawa   | 450.9<br>(442.9 to 459.3) | 326.5<br>(316.2 to 337.5) | -27.6<br>(-30.2 to -24.9) | 81.9<br>(81.7 to 82.1) | 85.9<br>(85.7 to 86.2) | 4.9<br>(4.4 to 5.5) | 72.4<br>(69.5 to 74.8) | 75.9<br>(73.1 to 78.5) | 4.9<br>(4.5 to 5.3) |

Japan and prefectures are ordered from north (Hokkaido) to south (Okinawa).



**Web Table 3: Age-standardised rates of years of life lost (YLLs), years lived with disability (YLDs), disability-adjusted life years (DALYs) for Japan and the 47 prefectures in 1990 and 2015 for both sexes combined (A), men (B), and women (C).**

| A (Both sexes combined) |                                           |                               |                             |                                           |                              |                             |                                            |                                 |                             |
|-------------------------|-------------------------------------------|-------------------------------|-----------------------------|-------------------------------------------|------------------------------|-----------------------------|--------------------------------------------|---------------------------------|-----------------------------|
|                         | Age-standardize YLD rate<br>(per 100 000) |                               |                             | Age-standardize YLL rate<br>(per 100 000) |                              |                             | Age-standardize DALY rate<br>(per 100 000) |                                 |                             |
|                         | 1990                                      | 2015                          | Percent change<br>1990–2015 | 1990                                      | 2015                         | Percent change<br>1990–2015 | 1990                                       | 2015                            | Percent change<br>1990–2015 |
| Japan                   | 9084.9<br>(6741.5 to 11708.3)             | 8765.0<br>(6508.8 to 11271.2) | -3.5<br>(-4.3 to -2.6)      | 10880.1<br>(10856.2 to 10902.4)           | 7246.7<br>(7211.2 to 7283.3) | -33.4<br>(-33.8 to -33.0)   | 19965.0<br>(17616.4 to 22605.8)            | 16011.7<br>(13740.4 to 18526.2) | -19.8<br>(-22.0 to -17.9)   |
| Hokkaido                | 9047.6<br>(6713.7 to 11667.4)             | 8727.0<br>(6505.6 to 11244.2) | -3.5<br>(-4.6 to -2.3)      | 11235.6<br>(11104.5 to 11368.8)           | 7469.9<br>(7199.1 to 7700.7) | -33.5<br>(-36.1 to -31.2)   | 20283.2<br>(17894.3 to 22877.9)            | 16196.9<br>(13924.3 to 18726.6) | -20.1<br>(-22.9 to -17.8)   |
| Aomori                  | 9187.2<br>(6791.1 to 11866.7)             | 8881.6<br>(6579.9 to 11422.5) | -3.3<br>(-4.4 to -2.2)      | 12482.4<br>(12282.5 to 12679.3)           | 8661.8<br>(8423.4 to 8901.3) | -30.6<br>(-32.9 to -28.5)   | 21669.6<br>(19266.3 to 24404.1)            | 17543.4<br>(15247.6 to 20054.5) | -19.0<br>(-21.4 to -16.9)   |
| Iwate                   | 9144.7<br>(6801.1 to 11826.7)             | 8890.4<br>(6650.2 to 11511.8) | -2.8<br>(-6.1 to 2.4)       | 11345.1<br>(11146.0 to 11578.9)           | 8040.7<br>(7811.9 to 8307.3) | -29.1<br>(-31.8 to -26.5)   | 20489.8<br>(18149.0 to 23132.5)            | 16931.1<br>(14662.7 to 19581.5) | -17.4<br>(-20.0 to -14.6)   |
| Miyagi                  | 9117.7<br>(6823.0 to 11783.8)             | 8897.5<br>(6680.0 to 11434.5) | -2.4<br>(-5.2 to 2.1)       | 10614.7<br>(10461.8 to 10788.3)           | 6935.1<br>(6737.2 to 7141.5) | -34.7<br>(-36.8 to -32.4)   | 19732.4<br>(17365.8 to 22432.2)            | 15832.5<br>(13605.5 to 18412.7) | -19.8<br>(-22.6 to -17.1)   |
| Akita                   | 9035.1<br>(6719.1 to 11675.2)             | 8765.2<br>(6516.5 to 11269.5) | -3.0<br>(-4.2 to -1.6)      | 11231.3<br>(11034.2 to 11425.8)           | 8032.0<br>(7794.1 to 8265.6) | -28.5<br>(-31.0 to -26.2)   | 20266.4<br>(17935.6 to 22909.4)            | 16797.2<br>(14573.2 to 19321.7) | -17.1<br>(-19.5 to -15.0)   |
| Yamagata                | 8983.8<br>(6661.9 to 11544.3)             | 8721.0<br>(6484.8 to 11230.2) | -2.9<br>(-4.1 to -1.8)      | 9963.0<br>(9794.3 to 10122.7)             | 7341.5<br>(7108.6 to 7572.6) | -26.3<br>(-29.1 to -23.8)   | 18946.7<br>(16583.0 to 21537.4)            | 16062.5<br>(13798.1 to 18610.0) | -15.2<br>(-17.5 to -13.2)   |
| Fukushima               | 9170.2<br>(6792.2 to 11806.7)             | 8808.9<br>(6565.3 to 11342.3) | -3.9<br>(-5.3 to -2.5)      | 11168.2<br>(10988.5 to 11341.5)           | 7487.6<br>(7218.4 to 7752.8) | -32.9<br>(-35.7 to -30.2)   | 20338.4<br>(17946.1 to 22977.2)            | 16296.5<br>(14046.2 to 18806.2) | -19.9<br>(-22.5 to -17.5)   |
| Ibaraki                 | 9144.5<br>(6791.9 to 11785.0)             | 8802.8<br>(6513.2 to 11298.6) | -3.7<br>(-4.8 to -2.6)      | 11390.7<br>(11280.4 to 11510.5)           | 7742.6<br>(7546.8 to 7938.7) | -32.0<br>(-34.0 to -30.2)   | 20535.2<br>(18192.7 to 23223.8)            | 16545.4<br>(14250.6 to 19149.0) | -19.4<br>(-21.8 to -17.4)   |
| Tochigi                 | 9081.0<br>(6716.3 to 11727.2)             | 8751.9<br>(6481.1 to 11256.0) | -3.6<br>(-4.8 to -2.4)      | 11652.0<br>(11489.7 to 11813.6)           | 7638.8<br>(7428.4 to 7845.4) | -34.4<br>(-36.5 to -32.4)   | 20732.9<br>(18347.4 to 23439.4)            | 16390.6<br>(14162.5 to 18927.0) | -20.9<br>(-23.5 to -18.6)   |
| Gunma                   | 9343.6<br>(6930.6 to 12007.1)             | 8993.4<br>(6668.1 to 11563.1) | -3.7<br>(-4.8 to -2.7)      | 10689.2<br>(10516.6 to 10853.2)           | 7438.3<br>(7202.3 to 7696.5) | -30.4<br>(-33.1 to -27.8)   | 20032.8<br>(17547.1 to 22767.1)            | 16431.6<br>(14010.3 to 19082.4) | -18.0<br>(-20.6 to -15.7)   |
| Saitama                 | 9051.4<br>(6704.5 to 11670.6)             | 8773.8<br>(6515.7 to 11270.2) | -3.1<br>(-4.2 to -1.9)      | 10716.0<br>(10621.1 to 10827.7)           | 7424.9<br>(7263.7 to 7590.1) | -30.7<br>(-32.3 to -29.1)   | 19767.4<br>(17436.4 to 22347.4)            | 16198.7<br>(13898.2 to 18761.1) | -18.1<br>(-20.4 to -16.1)   |
| Chiba                   | 9095.6<br>(6745.2 to 11725.3)             | 8806.5<br>(6514.5 to 11315.3) | -3.2<br>(-4.3 to -2.1)      | 10506.9<br>(10418.3 to 10605.6)           | 7257.5<br>(7119.8 to 7412.2) | -31.0<br>(-32.3 to -29.4)   | 19602.4<br>(17235.4 to 22282.4)            | 16063.9<br>(13757.2 to 18543.8) | -18.1<br>(-20.3 to -16.2)   |
| Tokyo                   | 8999.6<br>(6659.3 to 11601.5)             | 8651.3<br>(6420.4 to 11131.0) | -3.9<br>(-4.9 to -2.7)      | 10709.1<br>(10620.1 to 10792.6)           | 7079.5<br>(6932.4 to 7227.8) | -33.9<br>(-35.4 to -32.4)   | 19708.6<br>(17389.8 to 22383.6)            | 15730.8<br>(13436.2 to 18321.2) | -20.2<br>(-22.7 to -18.0)   |
| Kanagawa                | 8960.5<br>(6630.7 to 11530.0)             | 8674.4<br>(6436.3 to 11136.9) | -3.2<br>(-4.3 to -1.9)      | 10465.2<br>(10377.3 to 10551.1)           | 6973.5<br>(6823.1 to 7112.5) | -33.4<br>(-34.9 to -31.9)   | 19425.7<br>(17087.7 to 22031.6)            | 15647.9<br>(13358.5 to 18173.1) | -19.4<br>(-22.0 to -17.4)   |
| Niigata                 | 9240.7<br>(6857.1 to 11881.8)             | 9009.5<br>(6686.6 to 11604.5) | -2.5<br>(-3.5 to -1.3)      | 10006.0<br>(9830.9 to 10198.4)            | 7039.9<br>(6764.7 to 7326.2) | -29.7<br>(-32.6 to -26.3)   | 19246.7<br>(16811.9 to 22007.5)            | 16049.4<br>(13711.4 to 18692.4) | -16.6<br>(-19.3 to -14.2)   |
| Toyama                  | 9203.2<br>(6807.9 to 11851.9)             | 8872.4<br>(6592.6 to 11442.0) | -3.6<br>(-4.6 to -2.4)      | 10596.1<br>(10428.3 to 10758.0)           | 7063.7<br>(6840.9 to 7289.9) | -33.3<br>(-35.8 to -30.9)   | 19799.3<br>(17388.6 to 22457.8)            | 15936.0<br>(13638.9 to 18478.6) | -19.5<br>(-22.1 to -17.3)   |
| Ishikawa                | 9093.7<br>(6732.4 to 11719.0)             | 8780.2<br>(6515.9 to 11275.6) | -3.4<br>(-4.6 to -2.1)      | 9963.7<br>(9789.3 to 10140.2)             | 6723.3<br>(6528.6 to 6928.8) | -32.5<br>(-34.9 to -30.2)   | 19057.4<br>(16723.9 to 21704.6)            | 15503.5<br>(13195.1 to 18024.5) | -18.6<br>(-21.1 to -16.4)   |
| Fukui                   | 9061.5<br>(6711.9 to 11705.6)             | 8728.6<br>(6493.7 to 11259.6) | -3.7<br>(-4.7 to -2.6)      | 9802.3<br>(9601.7 to 10035.2)             | 6536.3<br>(6316.0 to 6751.4) | -33.3<br>(-36.0 to -30.7)   | 18863.7<br>(16546.4 to 21528.4)            | 15264.9<br>(13016.4 to 17790.2) | -19.1<br>(-22.0 to -16.8)   |
| Yamanashi               | 9047.6<br>(6720.2 to 11671.0)             | 8648.6<br>(6403.9 to 11107.7) | -4.4<br>(-5.5 to -3.2)      | 11167.4<br>(10925.2 to 11418.1)           | 7097.1<br>(6786.1 to 7416.3) | -36.4<br>(-39.5 to -33.3)   | 20215.0<br>(17891.8 to 22889.4)            | 15745.7<br>(13525.5 to 18238.1) | -22.1<br>(-25.1 to -19.6)   |
| Nagano                  | 8944.6<br>(6640.9 to 11522.2)             | 8639.3<br>(6432.7 to 11103.9) | -3.4<br>(-4.5 to -2.3)      | 9618.5<br>(9442.0 to 9795.3)              | 6455.6<br>(6213.9 to 6711.5) | -33.0<br>(-35.6 to -29.8)   | 18563.1<br>(16263.8 to 21167.7)            | 15094.9<br>(12830.6 to 17650.5) | -18.7<br>(-21.6 to -16.2)   |
| Gifu                    | 9275.5<br>(6871.3 to 12006.5)             | 8934.2<br>(6630.7 to 11517.2) | -3.7<br>(-4.7 to -2.7)      | 10281.0<br>(10104.8 to 10471.0)           | 7058.7<br>(6792.6 to 7340.8) | -31.4<br>(-34.3 to -28.5)   | 19556.6<br>(17113.2 to 22315.4)            | 15992.9<br>(13649.6 to 18588.9) | -18.2<br>(-20.9 to -15.8)   |
| Shizuoka                | 9101.1<br>(6740.1 to 11772.1)             | 8805.0<br>(6545.9 to 11313.1) | -3.3<br>(-4.4 to -2.0)      | 10339.4<br>(10232.0 to 10449.2)           | 7080.3<br>(6922.8 to 7234.0) | -31.5<br>(-33.2 to -29.9)   | 19440.5<br>(17071.1 to 22093.9)            | 15885.2<br>(13607.9 to 18417.7) | -18.3<br>(-20.6 to -16.3)   |
| Aichi                   | 8988.4<br>(6660.0 to 11584.3)             | 8690.0<br>(6456.4 to 11151.9) | -3.3<br>(-4.5 to -2.1)      | 10691.0<br>(10603.3 to 10782.1)           | 7152.8<br>(7013.4 to 7288.4) | -33.1<br>(-34.5 to -31.7)   | 19679.4<br>(17373.0 to 22286.1)            | 15842.8<br>(13634.8 to 18358.4) | -19.5<br>(-22.0 to -17.4)   |
| Mie                     | 9111.3<br>(6741.5 to 11708.3)             | 8779.0<br>(6508.8 to 11271.2) | -3.6<br>(-4.8 to -2.4)      | 10514.6<br>(10344.4 to 10684.8)           | 7030.4<br>(6823.1 to 7237.7) | -33.2<br>(-35.7 to -30.7)   | 19625.9<br>(17235.4 to 22282.4)            | 15809.4<br>(13436.2 to 18321.2) | -19.4<br>(-22.7 to -18.0)   |

|           |                     |                     |                |                      |                    |                  |                      |                      |                  |
|-----------|---------------------|---------------------|----------------|----------------------|--------------------|------------------|----------------------|----------------------|------------------|
|           | (6755.5 to 11768.3) | (6522.4 to 11316.7) | (-4.7 to -2.5) | (10373.9 to 10656.9) | (6838.7 to 7235.1) | (-35.1 to -30.9) | (17278.4 to 22295.3) | (13508.6 to 18384.4) | (-22.0 to -17.3) |
| Shiga     | 9022.1              | 8655.9              | -4.1           | 9945.5               | 6181.3             | -37.9            | 18967.7              | 14837.3              | -21.8            |
|           | (6690.4 to 11636.0) | (6424.0 to 11133.5) | (-5.1 to -3.0) | (9738.5 to 10155.9)  | (5950.7 to 6427.1) | (-40.5 to -35.0) | (16590.7 to 21601.9) | (12618.5 to 17338.8) | (-24.9 to -19.2) |
| Kyoto     | 8995.9              | 8679.4              | -3.5           | 10394.7              | 6785.5             | -34.7            | 19390.6              | 15464.9              | -20.2            |
|           | (6660.9 to 11600.1) | (6462.4 to 11178.4) | (-4.6 to -2.4) | (10271.5 to 10510.6) | (6596.8 to 6978.3) | (-36.7 to -32.7) | (17063.1 to 22026.1) | (13216.3 to 17975.9) | (-22.9 to -18.1) |
| Osaka     | 9032.8              | 8721.4              | -3.4           | 11902.6              | 7714.2             | -35.2            | 20935.4              | 16435.6              | -21.5            |
|           | (6699.2 to 11630.8) | (6458.9 to 11230.9) | (-4.5 to -2.3) | (11792.5 to 12001.7) | (7501.7 to 7928.7) | (-37.1 to -33.3) | (18620.6 to 23578.7) | (14194.9 to 18989.2) | (-24.2 to -19.1) |
| Hyogo     | 9252.8              | 8976.3              | -3.0           | 11280.9              | 7119.5             | -36.9            | 20533.7              | 16095.9              | -21.6            |
|           | (6844.9 to 11976.7) | (6748.5 to 11584.1) | (-5.1 to 1.1)  | (11168.6 to 11393.5) | (6933.0 to 7311.2) | (-38.6 to -35.1) | (18154.5 to 23250.4) | (13833.3 to 18707.5) | (-24.5 to -19.1) |
| Nara      | 9114.4              | 8776.2              | -3.7           | 10276.4              | 6546.1             | -36.3            | 19390.8              | 15322.3              | -21.0            |
|           | (6776.4 to 11737.3) | (6509.1 to 11281.7) | (-4.8 to -2.5) | (10090.7 to 10458.3) | (6320.4 to 6766.1) | (-38.7 to -33.9) | (17062.6 to 22016.1) | (13056.2 to 17834.8) | (-23.6 to -18.5) |
| Wakayama  | 9131.4              | 8747.5              | -4.2           | 11788.9              | 7501.0             | -36.4            | 20920.3              | 16248.4              | -22.3            |
|           | (6781.1 to 11803.3) | (6504.8 to 11290.4) | (-5.3 to -3.1) | (11580.7 to 12016.4) | (7211.2 to 7818.4) | (-39.0 to -33.5) | (18571.1 to 23626.1) | (13987.0 to 18904.0) | (-25.1 to -19.7) |
| Tottori   | 9064.4              | 8749.8              | -3.5           | 11318.2              | 7662.1             | -32.3            | 20382.6              | 16411.9              | -19.5            |
|           | (6729.7 to 11667.8) | (6519.2 to 11255.3) | (-4.6 to -2.3) | (11062.1 to 11608.4) | (7335.8 to 8022.2) | (-35.8 to -28.7) | (17978.6 to 23078.2) | (14190.9 to 18956.6) | (-22.3 to -16.8) |
| Shimane   | 9023.1              | 8633.8              | -4.3           | 10920.5              | 7255.9             | -33.6            | 19943.6              | 15889.6              | -20.3            |
|           | (6688.4 to 11633.4) | (6410.3 to 11112.2) | (-5.4 to -3.1) | (10662.9 to 11194.0) | (6925.1 to 7600.6) | (-37.0 to -29.9) | (17628.4 to 22581.3) | (13621.6 to 18383.5) | (-23.3 to -17.6) |
| Okayama   | 9060.4              | 8678.9              | -4.2           | 10635.2              | 6968.5             | -34.5            | 19695.6              | 15647.4              | -20.6            |
|           | (6739.3 to 11661.1) | (6473.7 to 11205.5) | (-5.3 to -2.9) | (10485.5 to 10789.3) | (6775.4 to 7177.4) | (-36.5 to -32.4) | (17350.6 to 22308.3) | (13388.1 to 18215.6) | (-23.1 to -18.2) |
| Hiroshima | 9045.3              | 8688.1              | -3.9           | 10790.0              | 7078.9             | -34.4            | 19835.3              | 15767.0              | -20.5            |
|           | (6717.2 to 11649.8) | (6450.1 to 11186.3) | (-5.0 to -2.7) | (10673.7 to 10899.5) | (6913.8 to 7247.3) | (-36.0 to -32.7) | (17492.5 to 22493.2) | (13561.1 to 18264.5) | (-22.9 to -18.5) |
| Yamaguchi | 9134.7              | 8714.7              | -4.6           | 11325.1              | 7378.9             | -34.8            | 20459.8              | 16093.6              | -21.3            |
|           | (6783.9 to 11795.1) | (6471.0 to 11229.3) | (-5.7 to -3.4) | (11162.6 to 11484.4) | (7156.8 to 7593.6) | (-37.0 to -32.7) | (18019.3 to 23150.6) | (13892.6 to 18651.5) | (-23.8 to -19.1) |
| Tokushima | 9306.5              | 8937.4              | -4.0           | 11533.1              | 7805.8             | -32.3            | 20839.5              | 16743.2              | -19.7            |
|           | (6895.7 to 12024.2) | (6639.3 to 11489.7) | (-5.0 to -2.8) | (11262.2 to 11797.2) | (7453.8 to 8169.9) | (-35.8 to -28.8) | (18436.5 to 23539.3) | (14415.9 to 19386.2) | (-22.5 to -17.1) |
| Kagawa    | 9124.0              | 8827.7              | -3.2           | 10809.3              | 7385.8             | -31.7            | 19933.3              | 16213.5              | -18.7            |
|           | (6779.2 to 11773.9) | (6552.9 to 11383.8) | (-4.3 to -2.3) | (10611.2 to 11011.9) | (7178.1 to 7610.6) | (-34.0 to -29.2) | (17548.5 to 22684.6) | (13931.1 to 18783.4) | (-21.0 to -16.5) |
| Ehime     | 9206.6              | 8875.6              | -3.6           | 11324.5              | 7738.3             | -31.7            | 20531.1              | 16613.9              | -19.1            |
|           | (6841.3 to 11876.2) | (6573.0 to 11418.0) | (-4.7 to -2.4) | (11074.2 to 11589.4) | (7447.6 to 8065.3) | (-34.7 to -28.4) | (18140.8 to 23264.0) | (14249.1 to 19216.8) | (-21.9 to -16.7) |
| Kochi     | 9536.7              | 9156.4              | -4.0           | 12136.4              | 8016.1             | -33.9            | 21673.1              | 17172.5              | -20.8            |
|           | (7052.9 to 12347.4) | (6800.0 to 11835.7) | (-5.0 to -2.9) | (11948.7 to 12331.8) | (7747.9 to 8260.5) | (-36.3 to -31.7) | (19176.8 to 24524.1) | (14864.5 to 19864.9) | (-23.4 to -18.5) |
| Fukuoka   | 9082.5              | 8751.3              | -3.6           | 11336.3              | 7121.7             | -37.2            | 20418.8              | 15873.0              | -22.3            |
|           | (6751.1 to 11752.0) | (6508.5 to 11249.7) | (-4.9 to -2.3) | (11234.1 to 11437.4) | (6958.5 to 7296.5) | (-38.7 to -35.5) | (18083.4 to 23092.6) | (13657.5 to 18393.5) | (-25.0 to -20.0) |
| Saga      | 9166.0              | 8827.3              | -3.7           | 11461.7              | 7231.1             | -36.9            | 20627.7              | 16058.3              | -22.2            |
|           | (6807.8 to 11836.6) | (6544.2 to 11360.9) | (-4.9 to -2.3) | (11207.6 to 11711.6) | (6916.4 to 7532.0) | (-39.9 to -33.7) | (18258.4 to 23337.1) | (13685.4 to 18619.6) | (-25.3 to -19.5) |
| Nagasaki  | 9269.6              | 8959.1              | -3.3           | 11508.7              | 7594.2             | -34.0            | 20778.3              | 16553.3              | -20.3            |
|           | (6876.6 to 12001.1) | (6652.5 to 11528.0) | (-4.5 to -2.2) | (11354.9 to 11672.0) | (7362.3 to 7831.3) | (-36.3 to -31.8) | (18353.4 to 23570.7) | (14203.2 to 19168.7) | (-22.9 to -17.9) |
| Kumamoto  | 9128.7              | 8801.3              | -3.6           | 10670.9              | 6924.4             | -35.1            | 19799.6              | 15725.8              | -20.6            |
|           | (6779.8 to 11716.0) | (6560.9 to 11328.9) | (-4.8 to -2.4) | (10522.5 to 10813.0) | (6705.2 to 7153.3) | (-37.3 to -32.8) | (17411.9 to 22393.6) | (13443.7 to 18264.2) | (-23.3 to -18.3) |
| Ōita      | 9197.4              | 8775.7              | -4.6           | 10971.0              | 6989.0             | -36.4            | 20168.5              | 15764.7              | -21.8            |
|           | (6825.3 to 11802.5) | (6522.3 to 11285.2) | (-5.7 to -3.5) | (10747.4 to 11195.7) | (6697.0 to 7297.4) | (-39.4 to -33.3) | (17788.1 to 22874.7) | (13507.7 to 18357.2) | (-24.7 to -19.2) |
| Miyazaki  | 9113.3              | 8777.3              | -3.7           | 11549.9              | 7444.6             | -35.5            | 20663.2              | 16221.8              | -21.5            |
|           | (6774.9 to 11760.8) | (6524.3 to 11271.2) | (-4.8 to -2.4) | (11392.0 to 11717.4) | (7230.9 to 7674.3) | (-37.6 to -33.4) | (18312.7 to 23355.8) | (13959.6 to 18791.6) | (-24.1 to -18.9) |
| Kagoshima | 9121.8              | 8822.5              | -3.3           | 11533.7              | 7848.1             | -32.0            | 20655.5              | 16670.6              | -19.3            |
|           | (6757.4 to 11772.8) | (6552.1 to 11322.5) | (-4.4 to -2.1) | (11310.1 to 11744.0) | (7553.8 to 8170.2) | (-34.7 to -29.1) | (18302.8 to 23311.1) | (14382.2 to 19276.0) | (-22.1 to -16.9) |
| Okinawa   | 9174.8              | 8868.4              | -3.3           | 11414.7              | 8371.1             | -26.7            | 20589.5              | 17239.5              | -16.3            |
|           | (6833.2 to 11824.7) | (6581.1 to 11425.5) | (-4.4 to -2.2) | (11221.1 to 11618.4) | (8111.9 to 8655.0) | (-29.2 to -24.0) | (18205.3 to 23289.9) | (14895.8 to 19894.5) | (-18.7 to -14.0) |

| B (Men)   | Age-standardize YLD rate<br>(per 100 000) |                               |                               | Age-standardize YLL rate<br>(per 100 000) |                                 |                              | Age-standardize DALY rate<br>(per 100 000) |                                 |                                 |
|-----------|-------------------------------------------|-------------------------------|-------------------------------|-------------------------------------------|---------------------------------|------------------------------|--------------------------------------------|---------------------------------|---------------------------------|
|           | 1990                                      | 2015                          | Percent change<br>1990–2015   | 1990                                      | 2015                            | Percent change<br>1990–2015  | 1990                                       | 2015                            | Percent change<br>1990–2015     |
|           | Japan                                     | 8665.0<br>(6433.3 to 11158.1) | 8390.7<br>(6253.1 to 10755.6) | -3.2<br>(-4.1 to -1.9)                    | 14529.5<br>(14494.8 to 14563.6) | 9752.2<br>(9687.1 to 9818.4) | -32.9<br>(-33.4 to -32.4)                  | 23194.5<br>(20959.6 to 25725.3) | 18142.8<br>(15975.9 to 20541.0) |
| Hokkaido  | 8582.3<br>(6373.9 to 11074.9)             | 8363.4<br>(6210.1 to 10719.5) | -2.5<br>(-3.9 to -1.0)        | 15021.5<br>(14822.4 to 15259.4)           | 10083.0<br>(9600.4 to 10555.2)  | -32.8<br>(-36.1 to -29.6)    | 23603.7<br>(21335.8 to 26100.3)            | 18446.4<br>(16210.7 to 20842.6) | -21.8<br>(-24.9 to -19.2)       |
| Aomori    | 8761.7<br>(6515.4 to 11297.4)             | 8480.8<br>(6287.2 to 10902.6) | -3.2<br>(-4.6 to -1.7)        | 17699.1<br>(17402.6 to 17999.3)           | 12055.0<br>(11631.9 to 12454.0) | -31.9<br>(-34.5 to -29.4)    | 26460.8<br>(24136.4 to 29102.3)            | 20535.9<br>(18313.3 to 22913.0) | -22.4<br>(-25.1 to -20.1)       |
| Iwate     | 8769.5<br>(6531.3 to 11362.6)             | 8524.8<br>(6351.6 to 10938.7) | -2.8<br>(-4.9 to 0.2)         | 15636.8<br>(15347.9 to 16017.8)           | 11332.1<br>(10901.0 to 11742.5) | -27.6<br>(-30.7 to -24.3)    | 24406.3<br>(22139.6 to 26968.6)            | 19856.9<br>(17623.5 to 22313.3) | -18.6<br>(-21.5 to -16.0)       |
| Miyagi    | 8655.9<br>(6442.1 to 11221.9)             | 8436.6<br>(6309.8 to 10829.9) | -2.5<br>(-4.4 to 0.2)         | 14269.0<br>(14038.2 to 14558.7)           | 9359.0<br>(9039.0 to 9705.0)    | -34.4<br>(-37.0 to -31.9)    | 22924.9<br>(20687.1 to 25514.4)            | 17795.6<br>(15610.4 to 20236.4) | -22.4<br>(-25.2 to -19.7)       |
| Akita     | 8648.4<br>(6427.3 to 11172.1)             | 8409.3<br>(6245.5 to 10779.7) | -2.8<br>(-4.2 to -0.9)        | 15647.0<br>(15350.9 to 15934.4)           | 11272.9<br>(10871.5 to 11677.9) | -28.0<br>(-30.7 to -25.0)    | 24295.3<br>(22042.7 to 26755.1)            | 19682.2<br>(17525.3 to 22086.8) | -19.0<br>(-21.8 to -16.6)       |
| Yamagata  | 8578.8<br>(6362.2 to 11028.9)             | 8304.9<br>(6200.9 to 10643.7) | -3.2<br>(-4.6 to -1.7)        | 13524.8<br>(13280.4 to 13774.0)           | 9879.9<br>(9486.4 to 10235.0)   | -27.0<br>(-30.0 to -24.0)    | 22103.5<br>(19862.8 to 24612.4)            | 18184.8<br>(15988.0 to 20593.0) | -17.7<br>(-20.3 to -15.3)       |
| Fukushima | 8778.5<br>(6541.5 to 11300.3)             | 8468.6<br>(6319.6 to 10895.1) | -3.5<br>(-5.0 to -1.8)        | 15079.8<br>(14794.8 to 15347.1)           | 10260.6<br>(9784.2 to 10690.0)  | -31.9<br>(-35.3 to -28.7)    | 23858.2<br>(21549.1 to 26454.9)            | 18729.2<br>(16555.6 to 21148.8) | -21.5<br>(-24.5 to -18.8)       |
| Ibaraki   | 8734.7<br>(6481.6 to 11250.4)             | 8431.5<br>(6263.4 to 10825.1) | -3.5<br>(-4.8 to -1.9)        | 15138.8<br>(14963.5 to 15313.2)           | 10391.1<br>(10077.1 to 10693.4) | -31.3<br>(-33.7 to -29.2)    | 23873.6<br>(21593.5 to 26522.5)            | 18822.6<br>(16665.9 to 21290.8) | -21.2<br>(-23.6 to -19.0)       |
| Tochigi   | 8695.2<br>(6446.4 to 11264.4)             | 8431.4<br>(6260.0 to 10818.6) | -3.0<br>(-4.5 to -1.5)        | 15377.1<br>(15114.1 to 15627.8)           | 10423.2<br>(10085.1 to 10789.5) | -32.3<br>(-34.7 to -29.7)    | 24072.2<br>(21782.4 to 26619.4)            | 18854.6<br>(16736.9 to 21250.3) | -21.7<br>(-24.2 to -19.2)       |
| Gunma     | 9158.1<br>(6812.1 to 11792.7)             | 8876.0<br>(6596.9 to 11373.0) | -3.1<br>(-4.3 to -1.6)        | 13893.8<br>(13660.0 to 14130.9)           | 9900.6<br>(9542.6 to 10269.2)   | -28.7<br>(-31.5 to -25.8)    | 23051.8<br>(20624.4 to 25715.9)            | 18776.6<br>(16403.5 to 21421.1) | -18.5<br>(-21.3 to -16.2)       |
| Saitama   | 8583.5<br>(6368.5 to 11087.3)             | 8357.4<br>(6225.9 to 10710.0) | -2.6<br>(-4.1 to -1.0)        | 13941.2<br>(13793.5 to 14087.8)           | 9714.1<br>(9443.6 to 9974.8)    | -30.3<br>(-32.3 to -28.4)    | 22524.7<br>(20336.6 to 24987.6)            | 18071.5<br>(15894.3 to 20483.7) | -19.8<br>(-22.2 to -17.7)       |
| Chiba     | 8658.4<br>(6433.4 to 11183.3)             | 8425.9<br>(6257.6 to 10804.0) | -2.7<br>(-4.1 to -1.1)        | 13895.8<br>(13766.4 to 14037.6)           | 9645.0<br>(9415.6 to 9890.9)    | -30.6<br>(-32.2 to -28.7)    | 22554.2<br>(20316.3 to 25117.0)            | 18070.9<br>(15847.7 to 20513.3) | -19.9<br>(-22.2 to -17.9)       |
| Tokyo     | 8647.8<br>(6403.8 to 11177.5)             | 8323.4<br>(6187.3 to 10686.3) | -3.8<br>(-5.1 to -2.2)        | 14140.8<br>(14017.8 to 14264.2)           | 9357.0<br>(9080.4 to 9614.3)    | -33.8<br>(-35.7 to -32.0)    | 22788.6<br>(20552.5 to 25338.2)            | 17680.4<br>(15457.6 to 20174.2) | -22.4<br>(-24.9 to -20.1)       |
| Kanagawa  | 8529.3<br>(6328.8 to 10983.0)             | 8270.8<br>(6158.1 to 10589.9) | -3.0<br>(-4.4 to -1.4)        | 13716.0<br>(13583.4 to 13849.7)           | 9196.5<br>(8951.6 to 9433.4)    | -32.9<br>(-34.7 to -31.1)    | 22245.3<br>(20052.0 to 24768.2)            | 17467.2<br>(15305.1 to 19855.7) | -21.5<br>(-23.9 to -19.3)       |
| Niigata   | 8770.8<br>(6517.7 to 11293.1)             | 8550.3<br>(6358.0 to 11001.0) | -2.5<br>(-3.7 to -0.9)        | 13548.3<br>(13265.1 to 13831.7)           | 9606.3<br>(9129.4 to 10115.8)   | -29.1<br>(-33.0 to -25.0)    | 22319.1<br>(20049.2 to 24947.1)            | 18156.7<br>(15883.3 to 20740.2) | -18.6<br>(-21.9 to -15.7)       |
| Toyama    | 8723.9<br>(6450.2 to 11271.8)             | 8461.5<br>(6305.4 to 10872.3) | -3.0<br>(-4.3 to -1.6)        | 14145.7<br>(13912.0 to 14392.1)           | 9602.5<br>(9264.4 to 9980.5)    | -32.1<br>(-34.9 to -29.3)    | 22869.7<br>(20586.7 to 25403.5)            | 18064.0<br>(15839.2 to 20497.9) | -21.0<br>(-23.7 to -18.6)       |
| Ishikawa  | 8619.0<br>(6384.7 to 11092.1)             | 8358.4<br>(6203.4 to 10706.3) | -3.0<br>(-4.3 to -1.3)        | 13352.5<br>(13091.6 to 13610.5)           | 9017.6<br>(8699.5 to 9339.2)    | -32.5<br>(-35.4 to -29.6)    | 21971.5<br>(19745.7 to 24451.5)            | 17376.0<br>(15219.1 to 19800.9) | -20.9<br>(-23.6 to -18.3)       |
| Fukui     | 8549.8<br>(6345.2 to 11020.1)             | 8251.5<br>(6143.5 to 10617.5) | -3.5<br>(-4.8 to -2.1)        | 12827.4<br>(12559.1 to 13114.7)           | 8799.3<br>(8443.5 to 9159.6)    | -31.4<br>(-34.6 to -28.1)    | 21377.3<br>(19174.8 to 23815.9)            | 17050.8<br>(14909.0 to 19489.7) | -20.2<br>(-23.2 to -17.5)       |
| Yamanashi | 8721.2<br>(6499.3 to 11250.4)             | 8325.4<br>(6207.9 to 10672.7) | -4.5<br>(-6.0 to -2.9)        | 15113.7<br>(14704.5 to 15562.5)           | 9688.1<br>(9155.2 to 10298.6)   | -35.9<br>(-39.9 to -31.7)    | 23834.9<br>(21464.8 to 26427.5)            | 18013.5<br>(15813.6 to 20402.1) | -24.4<br>(-27.8 to -21.3)       |
| Nagano    | 8550.7<br>(6343.5 to 11036.1)             | 8285.9<br>(6171.6 to 10622.4) | -3.1<br>(-4.4 to -1.5)        | 12346.9<br>(12081.0 to 12617.2)           | 8564.3<br>(8096.8 to 9037.3)    | -30.8<br>(-34.5 to -26.5)    | 20897.6<br>(18657.7 to 23454.4)            | 16850.1<br>(14650.6 to 19320.0) | -19.4<br>(-22.7 to -16.4)       |
| Gifu      | 9104.0<br>(6734.2 to 11769.7)             | 8784.6<br>(6506.6 to 11327.6) | -3.5<br>(-4.8 to -2.2)        | 13101.6<br>(12817.7 to 13408.0)           | 9284.8<br>(8836.6 to 9763.7)    | -29.2<br>(-33.1 to -25.1)    | 22205.6<br>(19808.3 to 24857.0)            | 18069.4<br>(15756.0 to 20679.7) | -18.6<br>(-21.7 to -15.7)       |
| Shizuoka  | 8663.7<br>(6453.9 to 11158.1)             | 8424.0<br>(6273.8 to 10799.5) | -2.8<br>(-4.1 to -1.2)        | 13783.8<br>(13633.4 to 13941.0)           | 9412.9<br>(9136.9 to 9695.3)    | -31.7<br>(-33.8 to -29.7)    | 22447.5<br>(20211.2 to 24975.6)            | 17836.9<br>(15659.4 to 20317.2) | -20.5<br>(-23.0 to -18.4)       |
| Aichi     | 8525.7<br>(6340.2 to 10986.1)             | 8321.0<br>(6211.7 to 10722.4) | -2.4<br>(-3.8 to -0.8)        | 13884.1<br>(13744.8 to 14013.6)           | 9446.4<br>(9209.0 to 9685.3)    | -32.0<br>(-33.7 to -30.1)    | 22409.8<br>(20209.5 to 24885.4)            | 17767.3<br>(15635.3 to 20199.3) | -20.7<br>(-23.2 to -18.4)       |
| Mie       | 8655.1<br>(6449.3 to 11204.1)             | 8390.8<br>(6248.5 to 10776.9) | -3.1<br>(-4.4 to -1.6)        | 13954.2<br>(13751.6 to 14163.4)           | 9497.8<br>(9184.1 to 9844.2)    | -31.9<br>(-34.4 to -29.2)    | 22609.3<br>(20366.8 to 25141.0)            | 17888.6<br>(15665.9 to 20282.3) | -20.9<br>(-23.4 to -18.5)       |
| Shiga     | 8623.3<br>(6376.6 to 11137.0)             | 8297.7<br>(6158.5 to 10664.8) | -3.8<br>(-5.1 to -2.4)        | 12838.4<br>(12521.7 to 13175.1)           | 8219.7<br>(7809.2 to 8679.1)    | -36.0<br>(-39.4 to -32.1)    | 21461.8<br>(19143.3 to 23960.3)            | 16517.4<br>(14392.2 to 18925.7) | -23.0<br>(-26.5 to -20.1)       |

|           |                               |                               |                        |                                 |                                 |                           |                                 |                                 |                           |
|-----------|-------------------------------|-------------------------------|------------------------|---------------------------------|---------------------------------|---------------------------|---------------------------------|---------------------------------|---------------------------|
| Kyoto     | 8581.4<br>(6350.5 to 11057.1) | 8304.4<br>(6175.5 to 10672.8) | -3.2<br>(-4.7 to -1.7) | 13670.1<br>(13476.8 to 13861.7) | 9200.1<br>(8871.5 to 9539.9)    | -32.7<br>(-35.2 to -30.2) | 22251.5<br>(20059.0 to 24783.0) | 17504.4<br>(15342.3 to 19943.1) | -21.3<br>(-24.0 to -18.9) |
| Osaka     | 8568.1<br>(6348.2 to 11047.3) | 8345.9<br>(6203.9 to 10717.8) | -2.6<br>(-4.0 to -0.9) | 15974.1<br>(15809.7 to 16141.2) | 10408.8<br>(10022.9 to 10785.3) | -34.9<br>(-37.5 to -32.4) | 24542.2<br>(22354.3 to 27011.7) | 18754.7<br>(16532.1 to 21218.8) | -23.6<br>(-26.4 to -20.9) |
| Hyogo     | 8774.9<br>(6490.0 to 11310.6) | 8478.8<br>(6302.7 to 10894.8) | -3.4<br>(-5.1 to -0.8) | 15144.7<br>(14979.2 to 15321.6) | 9614.9<br>(9316.3 to 9932.6)    | -36.5<br>(-38.6 to -34.2) | 23919.6<br>(21666.6 to 26441.7) | 18093.7<br>(15882.6 to 20542.7) | -24.4<br>(-27.0 to -21.9) |
| Nara      | 8686.1<br>(6465.0 to 11209.2) | 8407.3<br>(6250.9 to 10778.8) | -3.2<br>(-4.6 to -1.5) | 13469.7<br>(13210.7 to 13712.1) | 8886.8<br>(8547.3 to 9238.2)    | -34.0<br>(-36.9 to -31.1) | 22155.8<br>(19929.0 to 24660.2) | 17294.1<br>(15153.5 to 19663.8) | -21.9<br>(-24.7 to -19.4) |
| Wakayama  | 8734.5<br>(6495.9 to 11300.6) | 8371.5<br>(6262.1 to 10752.9) | -4.2<br>(-5.5 to -2.7) | 16232.2<br>(15878.0 to 16570.1) | 10188.8<br>(9716.2 to 10697.2)  | -37.3<br>(-40.3 to -33.9) | 24966.7<br>(22769.9 to 27584.1) | 18560.3<br>(16354.9 to 21045.7) | -25.7<br>(-28.8 to -22.7) |
| Tottori   | 8683.6<br>(6453.2 to 11219.3) | 8372.9<br>(6262.1 to 10768.5) | -3.6<br>(-5.0 to -2.1) | 15680.0<br>(15218.3 to 16168.7) | 10695.6<br>(10081.4 to 11283.5) | -31.7<br>(-36.0 to -27.5) | 24363.6<br>(21946.5 to 26978.9) | 19068.6<br>(16820.1 to 21555.6) | -21.7<br>(-25.4 to -18.5) |
| Shimane   | 8618.6<br>(6407.2 to 11118.1) | 8210.8<br>(6112.7 to 10482.7) | -4.7<br>(-6.1 to -3.3) | 15014.9<br>(14567.6 to 15476.4) | 10158.8<br>(9588.0 to 10780.3)  | -32.4<br>(-36.5 to -27.8) | 23633.4<br>(21347.9 to 26234.8) | 18369.5<br>(16184.3 to 20757.9) | -22.3<br>(-25.8 to -18.9) |
| Okayama   | 8683.3<br>(6457.8 to 11177.5) | 8342.7<br>(6234.3 to 10731.3) | -3.9<br>(-5.3 to -2.1) | 14404.9<br>(14155.4 to 14630.4) | 9590.7<br>(9264.0 to 9934.6)    | -33.4<br>(-35.8 to -30.7) | 23088.2<br>(20848.0 to 25609.6) | 17933.4<br>(15749.9 to 20379.3) | -22.3<br>(-25.0 to -19.8) |
| Hiroshima | 8632.0<br>(6422.6 to 11080.3) | 8324.5<br>(6187.7 to 10698.6) | -3.6<br>(-5.0 to -1.7) | 14557.6<br>(14374.4 to 14738.9) | 9667.9<br>(9394.5 to 9957.9)    | -33.6<br>(-35.6 to -31.5) | 23189.7<br>(20986.8 to 25740.0) | 17992.3<br>(15853.5 to 20396.9) | -22.4<br>(-24.9 to -20.3) |
| Yamaguchi | 8670.0<br>(6441.4 to 11189.3) | 8251.5<br>(6130.3 to 10597.3) | -4.8<br>(-6.2 to -3.3) | 15491.9<br>(15248.5 to 15737.1) | 10119.3<br>(9735.2 to 10473.1)  | -34.6<br>(-37.5 to -32.2) | 24161.8<br>(21843.2 to 26696.3) | 18370.8<br>(16283.3 to 20786.6) | -24.0<br>(-26.8 to -21.5) |
| Tokushima | 8822.3<br>(6548.0 to 11406.1) | 8549.3<br>(6380.5 to 10971.6) | -3.1<br>(-4.4 to -1.8) | 15579.8<br>(15160.4 to 16025.6) | 10779.5<br>(10188.0 to 11375.5) | -30.8<br>(-35.0 to -26.3) | 24402.1<br>(22105.0 to 26969.1) | 19328.8<br>(17020.1 to 21893.3) | -20.8<br>(-24.2 to -17.6) |
| Kagawa    | 8641.6<br>(6407.2 to 11157.8) | 8428.6<br>(6266.6 to 10838.3) | -2.5<br>(-3.8 to -1.0) | 14473.9<br>(14183.1 to 14761.9) | 10076.8<br>(9728.6 to 10448.0)  | -30.4<br>(-33.2 to -27.3) | 23115.6<br>(20780.3 to 25716.5) | 18505.3<br>(16268.3 to 20994.7) | -19.9<br>(-22.7 to -17.3) |
| Ehime     | 8768.1<br>(6535.8 to 11321.8) | 8486.3<br>(6323.0 to 10874.2) | -3.2<br>(-4.6 to -1.3) | 15402.2<br>(15016.0 to 15810.4) | 10775.1<br>(10238.6 to 11368.7) | -30.1<br>(-33.9 to -25.9) | 24170.4<br>(21815.6 to 26743.6) | 19261.3<br>(16972.5 to 21735.3) | -20.3<br>(-23.5 to -17.2) |
| Kochi     | 9008.2<br>(6682.1 to 11633.4) | 8660.3<br>(6437.0 to 11168.0) | -3.9<br>(-5.2 to -2.6) | 16941.0<br>(16626.5 to 17228.8) | 11199.4<br>(10778.7 to 11632.4) | -33.9<br>(-36.6 to -31.3) | 25949.2<br>(23545.8 to 28654.3) | 19859.7<br>(17632.0 to 22415.8) | -23.5<br>(-26.2 to -21.0) |
| Fukuoka   | 8618.0<br>(6402.3 to 11118.5) | 8337.4<br>(6220.1 to 10691.9) | -3.3<br>(-4.7 to -1.6) | 15692.8<br>(15531.1 to 15866.4) | 9760.6<br>(9469.5 to 10063.5)   | -37.8<br>(-39.7 to -35.6) | 24310.9<br>(22104.4 to 26802.5) | 18098.1<br>(15958.5 to 20499.7) | -25.6<br>(-28.3 to -23.1) |
| Saga      | 8698.5<br>(6474.4 to 11204.6) | 8437.8<br>(6269.7 to 10843.6) | -3.0<br>(-4.5 to -1.0) | 15626.4<br>(15216.6 to 16020.3) | 10042.5<br>(9531.2 to 10635.5)  | -35.9<br>(-39.5 to -31.5) | 24324.9<br>(22115.6 to 26935.2) | 18480.4<br>(16214.3 to 20951.4) | -24.0<br>(-27.6 to -20.8) |
| Nagasaki  | 8893.3<br>(6574.1 to 11528.7) | 8625.7<br>(6435.5 to 11092.1) | -3.0<br>(-4.3 to -1.6) | 15810.8<br>(15571.7 to 16068.4) | 10475.9<br>(10109.6 to 10856.2) | -33.7<br>(-36.5 to -31.0) | 24704.0<br>(22358.8 to 27345.6) | 19101.6<br>(16864.8 to 21643.6) | -22.7<br>(-25.4 to -20.1) |
| Kumamoto  | 8748.0<br>(6494.4 to 11218.1) | 8426.6<br>(6273.8 to 10850.6) | -3.7<br>(-5.0 to -2.2) | 14746.6<br>(14497.0 to 14974.3) | 9303.2<br>(8941.2 to 9684.2)    | -36.9<br>(-39.7 to -34.2) | 23494.7<br>(21231.8 to 26060.0) | 17729.8<br>(15527.5 to 20220.2) | -24.5<br>(-27.4 to -21.9) |
| Ōita      | 8754.4<br>(6506.1 to 11248.7) | 8421.6<br>(6263.7 to 10832.2) | -3.8<br>(-5.2 to -2.3) | 14909.5<br>(14538.7 to 15289.1) | 9729.6<br>(9189.0 to 10284.0)   | -34.7<br>(-38.5 to -30.7) | 23663.9<br>(21341.9 to 26209.2) | 18151.2<br>(16022.6 to 20653.7) | -23.3<br>(-26.6 to -20.1) |
| Miyazaki  | 8769.7<br>(6508.5 to 11326.3) | 8495.6<br>(6337.0 to 10905.1) | -3.1<br>(-4.6 to -1.5) | 15848.1<br>(15614.0 to 16111.8) | 10356.3<br>(9987.2 to 10729.9)  | -34.6<br>(-37.3 to -32.2) | 24617.8<br>(22355.1 to 27172.2) | 18851.8<br>(16634.6 to 21308.8) | -23.4<br>(-26.1 to -20.8) |
| Kagoshima | 8805.9<br>(6564.2 to 11381.5) | 8559.1<br>(6376.2 to 10971.9) | -2.8<br>(-4.2 to -1.2) | 15691.3<br>(15363.5 to 16050.0) | 10898.2<br>(10381.4 to 11495.9) | -30.6<br>(-34.1 to -26.5) | 24497.3<br>(22169.4 to 27040.1) | 19457.3<br>(17226.9 to 21979.3) | -20.6<br>(-23.8 to -17.6) |
| Okinawa   | 8753.1<br>(6526.4 to 11246.0) | 8508.4<br>(6335.5 to 10885.9) | -2.8<br>(-4.2 to -1.3) | 15745.3<br>(15462.0 to 16042.2) | 11678.1<br>(11272.3 to 12102.8) | -25.8<br>(-28.7 to -22.8) | 24498.5<br>(22201.2 to 27099.4) | 20186.5<br>(17835.8 to 22711.3) | -17.6<br>(-20.2 to -15.2) |

| C (Women) | Age-standardize YLD rate<br>(per 100 000) |                               |                               | Age-standardize YLL rate<br>(per 100 000) |                              |                              | Age-standardize DALY rate<br>(per 100 000) |                                 |                                 |
|-----------|-------------------------------------------|-------------------------------|-------------------------------|-------------------------------------------|------------------------------|------------------------------|--------------------------------------------|---------------------------------|---------------------------------|
|           | 1990                                      | 2015                          | Percent change<br>1990–2015   | 1990                                      | 2015                         | Percent change<br>1990–2015  | 1990                                       | 2015                            | Percent change<br>1990–2015     |
|           | Japan                                     | 9552.2<br>(7091.6 to 12314.9) | 9188.1<br>(6830.1 to 11844.5) | -3.8<br>(-4.7 to -2.8)                    | 7858.1<br>(7833.2 to 7883.8) | 5018.3<br>(4980.8 to 5052.6) | -36.1<br>(-36.7 to -35.6)                  | 17410.3<br>(14939.2 to 20177.4) | 14206.4<br>(11834.9 to 16878.8) |
| Hokkaido  | 9512.4<br>(7046.8 to 12259.4)             | 9128.0<br>(6795.1 to 11777.0) | -4.0<br>(-5.4 to -2.6)        | 8049.3<br>(7900.9 to 8201.4)              | 5258.8<br>(5001.5 to 5503.4) | -34.6<br>(-38.1 to -31.5)    | 17561.8<br>(15084.7 to 20333.8)            | 14386.7<br>(11961.6 to 17058.7) | -18.1<br>(-21.0 to -15.6)       |
| Aomori    | 9623.5<br>(7105.8 to 12445.6)             | 9340.2<br>(6918.4 to 12018.9) | -2.9<br>(-4.4 to -1.4)        | 8379.1<br>(8182.8 to 8577.5)              | 5821.5<br>(5565.0 to 6084.0) | -30.5<br>(-34.0 to -27.1)    | 18002.6<br>(15478.5 to 20854.8)            | 15161.7<br>(12769.9 to 17889.2) | -15.8<br>(-18.5 to -13.3)       |
| Iwate     | 9555.5<br>(7087.0 to 12351.6)             | 9318.6<br>(6947.8 to 12013.0) | -2.5<br>(-8.6 to 7.0)         | 7884.6<br>(7688.0 to 8095.4)              | 5163.9<br>(4919.8 to 5402.0) | -34.5<br>(-37.9 to -30.9)    | 17440.1<br>(15012.5 to 20194.1)            | 14482.4<br>(12058.4 to 17280.3) | -17.0<br>(-21.0 to -11.5)       |
| Miyagi    | 9623.1<br>(7176.4 to 12426.4)             | 9395.3<br>(7001.9 to 12010.2) | -2.4<br>(-6.9 to 5.9)         | 7588.1<br>(7413.6 to 7773.3)              | 4789.2<br>(4573.8 to 5006.7) | -36.8<br>(-40.1 to -33.6)    | 17211.2<br>(14680.1 to 20029.6)            | 14184.4<br>(11781.7 to 16836.0) | -17.6<br>(-21.2 to -13.4)       |
| Akita     | 9446.4<br>(7010.1 to 12188.0)             | 9186.7<br>(6801.5 to 11860.8) | -2.7<br>(-4.4 to -0.9)        | 7709.4<br>(7520.2 to 7904.9)              | 5266.1<br>(5051.5 to 5515.0) | -31.8<br>(-34.8 to -28.2)    | 17155.8<br>(14752.4 to 19927.8)            | 14452.8<br>(12103.9 to 17170.0) | -15.8<br>(-18.4 to -13.5)       |
| Yamagata  | 9424.8<br>(6991.7 to 12133.3)             | 9179.6<br>(6834.7 to 11866.3) | -2.6<br>(-4.0 to -1.2)        | 7088.7<br>(6917.7 to 7276.0)              | 5069.3<br>(4844.4 to 5307.1) | -28.5<br>(-32.5 to -24.6)    | 16513.5<br>(14042.7 to 19280.1)            | 14248.9<br>(11877.6 to 16942.1) | -13.7<br>(-16.4 to -11.5)       |
| Fukushima | 9609.6<br>(7086.1 to 12419.2)             | 9208.1<br>(6842.0 to 11885.2) | -4.2<br>(-6.3 to -1.9)        | 7928.4<br>(7722.1 to 8127.8)              | 4978.1<br>(4725.8 to 5230.1) | -37.2<br>(-40.8 to -33.7)    | 17538.0<br>(14976.6 to 20351.9)            | 14186.2<br>(11766.9 to 16915.9) | -19.1<br>(-22.4 to -16.4)       |
| Ibaraki   | 9623.7<br>(7161.8 to 12421.6)             | 9248.5<br>(6831.4 to 11873.2) | -3.9<br>(-5.4 to -2.5)        | 8142.7<br>(8016.9 to 8281.3)              | 5226.4<br>(5032.5 to 5422.9) | -35.8<br>(-38.3 to -33.3)    | 17766.4<br>(15309.0 to 20573.7)            | 14474.9<br>(12019.5 to 17162.7) | -18.5<br>(-21.4 to -16.1)       |
| Tochigi   | 9536.0<br>(7070.2 to 12335.5)             | 9145.8<br>(6788.9 to 11827.3) | -4.1<br>(-5.5 to -2.5)        | 8469.0<br>(8302.0 to 8634.5)              | 5059.2<br>(4856.3 to 5275.5) | -40.2<br>(-43.0 to -37.4)    | 18005.0<br>(15437.1 to 20799.0)            | 14205.0<br>(11807.4 to 16896.7) | -21.1<br>(-24.2 to -18.3)       |
| Gunma     | 9610.1<br>(7156.4 to 12378.6)             | 9179.2<br>(6820.3 to 11874.4) | -4.5<br>(-5.9 to -3.1)        | 7958.6<br>(7783.4 to 8128.1)              | 5166.6<br>(4951.3 to 5415.9) | -35.1<br>(-38.1 to -31.8)    | 17568.7<br>(15050.3 to 20413.8)            | 14345.9<br>(11883.1 to 17050.8) | -18.3<br>(-21.3 to -15.8)       |
| Saitama   | 9593.2<br>(7107.7 to 12360.3)             | 9255.4<br>(6873.1 to 11909.3) | -3.5<br>(-4.9 to -2.0)        | 7949.3<br>(7829.0 to 8065.7)              | 5276.5<br>(5112.0 to 5450.5) | -33.7<br>(-35.8 to -31.2)    | 17542.5<br>(15032.6 to 20312.6)            | 14531.8<br>(12131.2 to 17268.1) | -17.2<br>(-19.8 to -14.9)       |
| Chiba     | 9605.9<br>(7133.9 to 12400.7)             | 9239.9<br>(6840.5 to 11958.8) | -3.8<br>(-5.2 to -2.4)        | 7600.4<br>(7493.6 to 7702.7)              | 5031.4<br>(4879.4 to 5186.8) | -33.8<br>(-36.0 to -31.5)    | 17206.3<br>(14733.5 to 19986.7)            | 14271.3<br>(11857.5 to 16959.0) | -17.1<br>(-19.7 to -14.9)       |
| Tokyo     | 9429.4<br>(6991.2 to 12178.9)             | 9037.7<br>(6692.4 to 11674.9) | -4.2<br>(-5.5 to -2.6)        | 7814.4<br>(7720.0 to 7912.2)              | 5039.4<br>(4880.9 to 5205.4) | -35.5<br>(-37.8 to -33.2)    | 17243.8<br>(14772.8 to 20062.7)            | 14077.1<br>(11669.9 to 16762.2) | -18.4<br>(-21.1 to -16.0)       |
| Kanagawa  | 9488.2<br>(7021.1 to 12236.5)             | 9152.6<br>(6782.7 to 11851.4) | -3.5<br>(-4.9 to -1.8)        | 7589.5<br>(7482.3 to 7693.7)              | 4914.4<br>(4746.5 to 5071.1) | -35.2<br>(-37.5 to -33.1)    | 17077.7<br>(14582.6 to 19814.0)            | 14067.0<br>(11661.5 to 16806.1) | -17.6<br>(-20.4 to -15.3)       |
| Niigata   | 9744.3<br>(7219.2 to 12523.0)             | 9521.2<br>(7065.7 to 12278.6) | -2.3<br>(-3.7 to -0.8)        | 7123.4<br>(6924.7 to 7333.7)              | 4730.1<br>(4471.0 to 5017.1) | -33.6<br>(-37.7 to -29.0)    | 16867.7<br>(14327.5 to 19708.4)            | 14251.3<br>(11723.0 to 17089.4) | -15.5<br>(-18.6 to -12.7)       |
| Toyama    | 9700.7<br>(7179.9 to 12514.1)             | 9355.5<br>(6947.1 to 12092.8) | -3.6<br>(-5.1 to -2.1)        | 7721.0<br>(7530.4 to 7912.8)              | 4835.8<br>(4612.7 to 5078.7) | -37.3<br>(-40.6 to -33.8)    | 17421.7<br>(14883.1 to 20214.1)            | 14191.3<br>(11759.0 to 16896.9) | -18.5<br>(-21.9 to -15.9)       |
| Ishikawa  | 9593.6<br>(7117.3 to 12404.5)             | 9261.2<br>(6885.7 to 11921.4) | -3.5<br>(-4.9 to -1.8)        | 7227.5<br>(7044.2 to 7416.5)              | 4722.1<br>(4523.6 to 4926.9) | -34.6<br>(-37.9 to -31.3)    | 16821.0<br>(14370.0 to 19576.3)            | 13983.4<br>(11557.6 to 16726.7) | -16.9<br>(-19.9 to -14.4)       |
| Fukui     | 9612.2<br>(7115.4 to 12413.4)             | 9250.4<br>(6886.5 to 11957.2) | -3.8<br>(-5.2 to -2.2)        | 7324.2<br>(7112.6 to 7557.7)              | 4530.3<br>(4319.0 to 4744.7) | -38.2<br>(-41.6 to -34.6)    | 16936.4<br>(14495.6 to 19787.0)            | 13780.7<br>(11392.0 to 16480.0) | -18.6<br>(-22.0 to -15.9)       |
| Yamanashi | 9432.9<br>(6982.6 to 12168.1)             | 9029.1<br>(6695.9 to 11682.1) | -4.3<br>(-5.6 to -2.8)        | 7840.3<br>(7579.8 to 8092.6)              | 4738.8<br>(4448.4 to 5041.1) | -39.5<br>(-43.5 to -34.9)    | 17273.3<br>(14834.8 to 20013.0)            | 13767.9<br>(11381.0 to 16446.1) | -20.3<br>(-23.8 to -17.0)       |
| Nagano    | 9378.1<br>(6951.9 to 12105.7)             | 9045.2<br>(6697.4 to 11644.8) | -3.5<br>(-4.9 to -2.1)        | 7341.0<br>(7131.5 to 7551.7)              | 4534.3<br>(4273.9 to 4798.6) | -38.2<br>(-42.4 to -34.2)    | 16719.1<br>(14365.3 to 19513.2)            | 13579.5<br>(11231.9 to 16264.0) | -18.8<br>(-22.3 to -15.6)       |
| Gifu      | 9469.7<br>(7047.0 to 12234.1)             | 9119.7<br>(6771.4 to 11757.1) | -3.7<br>(-5.1 to -2.3)        | 7886.0<br>(7688.3 to 8110.4)              | 5077.6<br>(4814.3 to 5369.7) | -35.7<br>(-39.3 to -31.5)    | 17355.7<br>(14877.0 to 20173.2)            | 14197.2<br>(11841.3 to 16883.1) | -18.2<br>(-21.4 to -15.5)       |
| Shizuoka  | 9586.3<br>(7096.8 to 12381.6)             | 9250.4<br>(6845.7 to 11955.9) | -3.5<br>(-4.9 to -2.0)        | 7446.0<br>(7331.0 to 7573.4)              | 4947.0<br>(4782.6 to 5105.6) | -33.5<br>(-36.0 to -31.3)    | 17032.3<br>(14538.3 to 19824.2)            | 14197.4<br>(11816.9 to 16899.8) | -16.6<br>(-19.2 to -14.4)       |
| Aichi     | 9513.8<br>(7061.6 to 12266.9)             | 9128.9<br>(6792.5 to 11776.0) | -4.0<br>(-5.5 to -2.6)        | 7990.9<br>(7888.7 to 8093.9)              | 5030.9<br>(4885.0 to 5190.2) | -37.0<br>(-39.0 to -35.0)    | 17504.8<br>(15064.7 to 20315.6)            | 14159.8<br>(11794.7 to 16903.9) | -19.1<br>(-21.8 to -16.7)       |
| Mie       | 9595.1<br>(7104.0 to 12399.4)             | 9222.3<br>(6831.1 to 11905.6) | -3.9<br>(-5.2 to -2.5)        | 7689.3<br>(7538.1 to 7850.0)              | 4798.0<br>(4612.3 to 5005.3) | -37.7<br>(-40.2 to -34.7)    | 17284.4<br>(14783.3 to 20127.8)            | 14020.3<br>(11537.8 to 16731.8) | -18.9<br>(-21.9 to -16.3)       |
| Shiga     | 9464.5<br>(7045.3 to 12228.1)             | 9062.6<br>(6744.1 to 11673.9) | -4.2<br>(-5.7 to -2.9)        | 7551.1<br>(7316.8 to 7845.4)              | 4314.6<br>(4069.8 to 4562.3) | -42.9<br>(-46.7 to -39.0)    | 17015.6<br>(14553.6 to 19846.4)            | 13377.2<br>(11059.7 to 16054.8) | -21.4<br>(-24.9 to -18.4)       |

|           |                                |                               |                        |                              |                              |                           |                                 |                                 |                           |
|-----------|--------------------------------|-------------------------------|------------------------|------------------------------|------------------------------|---------------------------|---------------------------------|---------------------------------|---------------------------|
| Kyoto     | 9452.4<br>(6977.6 to 12233.7)  | 9081.3<br>(6744.1 to 11735.0) | -3.9<br>(-5.3 to -2.5) | 7740.6<br>(7599.9 to 7883.9) | 4693.7<br>(4501.3 to 4882.2) | -39.4<br>(-41.9 to -36.7) | 17193.0<br>(14762.1 to 19970.2) | 13775.1<br>(11425.5 to 16460.1) | -19.9<br>(-23.0 to -17.3) |
| Osaka     | 9543.5<br>(7072.3 to 12349.6)  | 9119.9<br>(6762.0 to 11770.3) | -4.4<br>(-5.7 to -3.0) | 8549.1<br>(8426.7 to 8670.0) | 5361.9<br>(5159.3 to 5577.0) | -37.3<br>(-39.7 to -34.6) | 18092.6<br>(15636.0 to 20906.0) | 14481.8<br>(12110.3 to 17206.6) | -20.0<br>(-22.8 to -17.6) |
| Hyogo     | 9746.5<br>(7227.6 to 12652.3)  | 9481.5<br>(7117.6 to 12188.1) | -2.7<br>(-6.1 to 4.1)  | 8120.7<br>(8003.7 to 8246.0) | 4962.4<br>(4783.3 to 5145.3) | -38.9<br>(-41.4 to -36.4) | 17867.1<br>(15373.6 to 20760.0) | 14443.9<br>(12003.9 to 17219.3) | -19.2<br>(-22.8 to -15.3) |
| Nara      | 9549.0<br>(7064.7 to 12325.1)  | 9140.5<br>(6783.3 to 11792.2) | -4.3<br>(-5.6 to -2.9) | 7677.4<br>(7505.2 to 7855.8) | 4551.2<br>(4330.0 to 4771.1) | -40.8<br>(-43.7 to -37.4) | 17226.4<br>(14742.0 to 20010.4) | 13691.6<br>(11325.3 to 16327.3) | -20.5<br>(-23.7 to -17.8) |
| Wakayama  | 9537.4<br>(7080.8 to 12274.2)  | 9150.3<br>(6768.7 to 11839.4) | -4.1<br>(-5.4 to -2.6) | 8257.1<br>(8013.5 to 8509.1) | 5227.9<br>(4935.6 to 5563.1) | -36.8<br>(-40.4 to -32.1) | 17794.5<br>(15287.3 to 20698.1) | 14378.3<br>(12012.0 to 17127.7) | -19.2<br>(-22.4 to -16.1) |
| Tottori   | 9491.6<br>(7028.5 to 12239.3)  | 9183.2<br>(6830.2 to 11828.4) | -3.2<br>(-4.6 to -1.8) | 7860.8<br>(7566.8 to 8157.1) | 5014.3<br>(4739.6 to 5354.2) | -36.3<br>(-40.5 to -31.4) | 17352.4<br>(14854.1 to 20162.7) | 14197.5<br>(11849.6 to 16892.6) | -18.2<br>(-21.8 to -15.2) |
| Shimane   | 9460.9<br>(6992.7 to 12289.7)  | 9123.7<br>(6782.1 to 11824.4) | -3.6<br>(-5.1 to -1.8) | 7622.5<br>(7354.5 to 7899.9) | 4664.5<br>(4357.3 to 4978.7) | -38.8<br>(-43.2 to -34.1) | 17083.4<br>(14618.8 to 19892.2) | 13788.2<br>(11412.5 to 16500.2) | -19.3<br>(-22.9 to -16.1) |
| Okayama   | 9459.8<br>(7024.3 to 12176.1)  | 9049.6<br>(6701.0 to 11691.4) | -4.3<br>(-5.7 to -2.9) | 7556.7<br>(7391.6 to 7729.6) | 4674.8<br>(4457.7 to 4868.3) | -38.1<br>(-41.2 to -35.5) | 17016.6<br>(14550.1 to 19749.0) | 13724.4<br>(11365.3 to 16368.2) | -19.3<br>(-22.4 to -16.7) |
| Hiroshima | 9485.3<br>(7002.5 to 12252.2)  | 9100.1<br>(6766.9 to 11774.8) | -4.1<br>(-5.4 to -2.6) | 7681.2<br>(7544.9 to 7816.2) | 4797.3<br>(4643.3 to 4969.3) | -37.5<br>(-40.0 to -35.0) | 17166.5<br>(14693.4 to 19947.5) | 13897.4<br>(11540.3 to 16603.6) | -19.0<br>(-22.0 to -16.7) |
| Yamaguchi | 9601.2<br>(7109.9 to 12412.8)  | 9227.6<br>(6837.2 to 11887.7) | -3.9<br>(-5.3 to -2.3) | 8022.9<br>(7844.4 to 8196.0) | 5051.8<br>(4831.7 to 5263.5) | -37.1<br>(-39.9 to -34.1) | 17624.1<br>(15121.7 to 20460.3) | 14279.4<br>(11907.5 to 17065.9) | -19.0<br>(-22.1 to -16.3) |
| Tokushima | 9798.0<br>(7259.7 to 12648.2)  | 9359.2<br>(6941.9 to 12083.7) | -4.5<br>(-5.8 to -3.0) | 8305.5<br>(8013.9 to 8598.4) | 5203.9<br>(4865.3 to 5540.0) | -37.4<br>(-41.8 to -32.5) | 18103.5<br>(15569.3 to 21016.1) | 14563.1<br>(12121.4 to 17301.9) | -19.6<br>(-23.0 to -16.5) |
| Kagawa    | 9623.1<br>(7161.8 to 12436.4)  | 9265.5<br>(6865.8 to 11975.2) | -3.7<br>(-5.0 to -2.4) | 7825.6<br>(7622.5 to 8042.6) | 5011.6<br>(4804.7 to 5224.7) | -35.9<br>(-39.1 to -32.6) | 17448.7<br>(14959.4 to 20290.5) | 14277.1<br>(11876.9 to 16999.6) | -18.2<br>(-21.3 to -15.7) |
| Ehime     | 9641.2<br>(7184.7 to 12419.5)  | 9297.9<br>(6888.1 to 11997.2) | -3.6<br>(-5.0 to -2.0) | 8091.7<br>(7832.8 to 8350.8) | 5169.0<br>(4884.0 to 5467.9) | -36.1<br>(-40.2 to -32.1) | 17732.9<br>(15246.6 to 20644.8) | 14466.9<br>(12016.7 to 17247.5) | -18.4<br>(-22.1 to -15.6) |
| Kochi     | 10067.7<br>(7459.8 to 13027.6) | 9693.1<br>(7180.3 to 12569.2) | -3.7<br>(-5.0 to -2.3) | 8373.5<br>(8169.9 to 8575.6) | 5296.1<br>(5035.8 to 5550.0) | -36.8<br>(-40.2 to -33.3) | 18441.2<br>(15828.5 to 21418.8) | 14989.1<br>(12397.0 to 17927.7) | -18.7<br>(-21.8 to -16.1) |
| Fukuoka   | 9563.6<br>(7093.4 to 12413.5)  | 9183.5<br>(6832.6 to 11858.2) | -4.0<br>(-5.6 to -2.3) | 7902.8<br>(7788.7 to 8020.4) | 4936.1<br>(4778.8 to 5106.5) | -37.5<br>(-39.8 to -35.1) | 17466.4<br>(15004.0 to 20325.7) | 14119.6<br>(11778.7 to 16806.2) | -19.2<br>(-22.0 to -16.5) |
| Saga      | 9636.5<br>(7141.7 to 12435.0)  | 9242.1<br>(6833.6 to 11916.4) | -4.1<br>(-5.6 to -2.6) | 8224.7<br>(7951.5 to 8503.4) | 4867.1<br>(4573.7 to 5175.4) | -40.8<br>(-44.7 to -36.7) | 17861.3<br>(15356.1 to 20789.9) | 14109.2<br>(11685.8 to 16827.1) | -21.0<br>(-24.6 to -17.9) |
| Nagasaki  | 9652.7<br>(7166.8 to 12489.8)  | 9315.8<br>(6923.6 to 12027.2) | -3.5<br>(-5.0 to -1.9) | 8194.7<br>(8018.0 to 8363.2) | 5193.4<br>(4963.9 to 5430.6) | -36.6<br>(-39.6 to -33.3) | 17847.4<br>(15347.3 to 20714.5) | 14509.2<br>(12095.7 to 17287.2) | -18.7<br>(-21.8 to -16.2) |
| Kumamoto  | 9521.0<br>(7081.3 to 12263.6)  | 9194.2<br>(6835.1 to 11882.5) | -3.4<br>(-5.0 to -1.8) | 7492.4<br>(7332.3 to 7651.2) | 4922.4<br>(4686.6 to 5178.1) | -34.2<br>(-37.6 to -30.8) | 17013.4<br>(14543.0 to 19715.2) | 14116.6<br>(11755.0 to 16780.5) | -17.0<br>(-19.9 to -14.4) |
| Ōita      | 9636.6<br>(7150.5 to 12447.1)  | 9173.3<br>(6823.4 to 11865.3) | -4.8<br>(-6.2 to -3.5) | 7869.9<br>(7624.2 to 8110.8) | 4653.3<br>(4375.6 to 4941.8) | -41.0<br>(-44.7 to -36.5) | 17506.6<br>(14990.7 to 20359.1) | 13826.6<br>(11389.2 to 16578.8) | -21.0<br>(-24.8 to -18.0) |
| Miyazaki  | 9462.4<br>(7045.8 to 12210.1)  | 9076.0<br>(6753.7 to 11704.9) | -4.1<br>(-5.4 to -2.6) | 8210.3<br>(8033.8 to 8398.0) | 4976.2<br>(4766.1 to 5200.0) | -39.4<br>(-42.3 to -36.5) | 17672.7<br>(15216.9 to 20468.2) | 14052.2<br>(11681.4 to 16743.4) | -20.5<br>(-23.8 to -17.7) |
| Kagoshima | 9457.8<br>(7029.5 to 12189.3)  | 9094.6<br>(6753.9 to 11738.7) | -3.8<br>(-5.2 to -2.4) | 8352.0<br>(8108.8 to 8609.4) | 5247.7<br>(4940.4 to 5556.8) | -37.2<br>(-41.0 to -33.0) | 17809.8<br>(15341.8 to 20571.1) | 14342.3<br>(11907.9 to 17032.0) | -19.5<br>(-23.0 to -16.5) |
| Okinawa   | 9658.5<br>(7177.8 to 12489.6)  | 9252.4<br>(6866.3 to 11905.1) | -4.2<br>(-5.5 to -2.9) | 8014.1<br>(7811.2 to 8234.8) | 5325.9<br>(5081.2 to 5579.3) | -33.6<br>(-37.1 to -29.8) | 17672.6<br>(15172.7 to 20523.5) | 14578.2<br>(12158.1 to 17333.7) | -17.5<br>(-20.5 to -14.8) |

Japan and prefectures are ordered from north (Hokkaido) to south (Okinawa).

**Web Table 4: Major health system inputs - per capita health expenditure in 2015 and number of physicians, registered nurses, and public health nurses per population in 2014.**

|           | Per capita health expenditure (USD) in 2015 | Number of health workforces per 100 000 in 2014* |                  |                     |
|-----------|---------------------------------------------|--------------------------------------------------|------------------|---------------------|
|           |                                             | Physician                                        | Registered nurse | Public health nurse |
| Japan     | 2126.4                                      | 233.6                                            | 855.2            | 38.1                |
| Hokkaido  | 2577.6                                      | 230.2                                            | 1069.1           | 56.1                |
| Aomori    | 2135.6                                      | 193.3                                            | 929.1            | 45.6                |
| Iwate     | 2005.9                                      | 192.0                                            | 1007.6           | 52.7                |
| Miyagi    | 1935.9                                      | 221.2                                            | 778.3            | 44.1                |
| Akita     | 2230.1                                      | 216.3                                            | 1005.9           | 54.5                |
| Yamagata  | 2183.8                                      | 215.0                                            | 958.5            | 49.1                |
| Fukushima | 2041.3                                      | 188.7                                            | 797.5            | 48.9                |
| Ibaraki   | 1788.7                                      | 169.6                                            | 674.0            | 37.6                |
| Tochigi   | 2048.5                                      | 212.8                                            | 758.5            | 42.3                |
| Gunma     | 2158.3                                      | 218.9                                            | 838.1            | 45.9                |
| Saitama   | 1611.1                                      | 152.8                                            | 568.9            | 25.9                |
| Chiba     | 1731.6                                      | 182.9                                            | 625.1            | 29.9                |
| Tokyo     | 2031.7                                      | 304.5                                            | 727.3            | 25.4                |
| Kanagawa  | 1707.6                                      | 201.8                                            | 672.4            | 22.8                |
| Niigata   | 1927.0                                      | 188.2                                            | 906.5            | 51.8                |
| Toyama    | 2236.1                                      | 234.9                                            | 1072.3           | 56.7                |
| Ishikawa  | 2360.8                                      | 270.6                                            | 1170.8           | 47.2                |
| Fukui     | 2301.6                                      | 240.0                                            | 1007.3           | 63.7                |
| Yamanashi | 1988.9                                      | 222.3                                            | 873.2            | 70.0                |
| Nagano    | 2047.6                                      | 216.8                                            | 969.1            | 69.5                |
| Gifu      | 2006.6                                      | 202.9                                            | 788.8            | 44.6                |
| Shizuoka  | 1960.2                                      | 193.9                                            | 787.4            | 43.2                |
| Aichi     | 1936.6                                      | 202.1                                            | 724.5            | 31.4                |
| Mie       | 1969.1                                      | 207.3                                            | 817.0            | 35.3                |
| Shiga     | 1854.7                                      | 211.6                                            | 899.4            | 47.2                |
| Kyoto     | 2292.3                                      | 307.9                                            | 943.9            | 41.6                |
| Osaka     | 2363.1                                      | 261.9                                            | 821.8            | 24.3                |
| Hyogo     | 2146.4                                      | 232.1                                            | 860.4            | 28.3                |
| Nara      | 2227.4                                      | 225.7                                            | 830.6            | 34.6                |
| Wakayama  | 2482.8                                      | 277.5                                            | 991.7            | 48.8                |
| Tottori   | 2428.1                                      | 289.6                                            | 1104.5           | 52.3                |
| Shimane   | 2378.5                                      | 265.2                                            | 1132.0           | 66.3                |
| Okayama   | 2490.5                                      | 287.8                                            | 1087.6           | 48.6                |
| Hiroshima | 2382.1                                      | 252.2                                            | 965.5            | 37.1                |
| Yamaguchi | 2571.5                                      | 244.8                                            | 1107.8           | 50.4                |
| Tokushima | 2719.6                                      | 303.3                                            | 1104.2           | 51.0                |
| Kagawa    | 2459.7                                      | 268.3                                            | 1071.8           | 53.6                |
| Ehime     | 2530.4                                      | 254.4                                            | 1101.5           | 48.2                |
| Kochi     | 3022.6                                      | 293.0                                            | 1314.4           | 68.8                |
| Fukuoka   | 2570.7                                      | 292.9                                            | 1073.5           | 33.0                |
| Saga      | 2474.8                                      | 266.2                                            | 1200.0           | 55.9                |
| Nagasaki  | 2665.2                                      | 287.8                                            | 1181.7           | 49.3                |
| Kumamoto  | 2664.1                                      | 275.3                                            | 1189.1           | 50.7                |
| Ōita      | 2634.3                                      | 260.8                                            | 1151.3           | 57.4                |
| Miyazaki  | 2408.0                                      | 233.2                                            | 1154.8           | 54.6                |
| Kagoshima | 2729.5                                      | 247.8                                            | 1215.6           | 52.8                |
| Okinawa   | 2150.3                                      | 241.5                                            | 951.9            | 51.0                |

Japan and prefectures are ordered from north (Hokkaido) to south (Okinawa). \*Data was extracted from the database maintained by the Ministry of Health, Labour and Welfare of Japan (physicians; <http://www.mhlw.go.jp/toukei/saikin/hw/ishi/14/index.html>, registered nurses and public health nurses; <http://www.mhlw.go.jp/toukei/saikin/hw/eisei/14/>).
